# Supplementary material for: Re and99mTc complexes of BodP3– multi-modality imaging probes
Source: Royal Society of Chemistry journal article supplement (doi:10.1039/c4cc06367h), 2014-01-01
Supplement: c4cc06367h1.pdf [file c4cc06367h1.pdf]

## Supporting Information

### Table of Contents

|                                                                                            |     |
|--------------------------------------------------------------------------------------------|-----|
| Table of Contents .....                                                                    | 1   |
| 1 General Considerations and Chemical Analysis.....                                        | 2   |
| 2 Experimental Procedures .....                                                            | 3   |
| 2.1 <i>cis,mer</i> (1)-[ReCl(CO) <sub>2</sub> (2)](3a) .....                               | 3   |
| 2.2 <i>cis,mer</i> (2)-[ReCl(CO) <sub>2</sub> (2)] (3b) .....                              | 4   |
| 2.3 <i>cis,fac</i> -[ReCl(CO) <sub>2</sub> (2)] (3c) .....                                 | 5   |
| 2.4 <i>fac</i> -[Re(CO) <sub>3</sub> (triphos-Ph)][OTf] (4) .....                          | 5   |
| 2.5 <i>fac</i> -[Re(CO) <sub>3</sub> (2)][OTf] (5) .....                                   | 7   |
| 3 Radiochemistry.....                                                                      | 9   |
| 3.1 General Experimental Considerations .....                                              | 9   |
| 3.2 <i>fac</i> -[ <sup>99m</sup> Tc(CO) <sub>3</sub> (triphos-Ph)] <sup>+</sup> (6) .....  | 9   |
| 3.3 <i>fac</i> -[ <sup>99m</sup> Tc(CO) <sub>3</sub> (2)] <sup>+</sup> (7) .....           | 10  |
| 3.4 Stability Analysis .....                                                               | 11  |
| 4 Cell Imaging .....                                                                       | 13  |
| 4.1 Cell Culturing and Cell Preparation .....                                              | 13  |
| 4.2 MTT Assays .....                                                                       | 13  |
| 4.3 Fluorescence Microscopy .....                                                          | 14  |
| 5 X-ray Crystallography .....                                                              | 16  |
| 5.1 General Information .....                                                              | 16  |
| 5.2 Crystallographic data for <i>cis,mer</i> (2)-[ReCl(CO) <sub>2</sub> (2)](3b).....      | 17  |
| 5.3 Crystallographic data for <i>cis,fac</i> -[ReCl(CO) <sub>2</sub> (2)](3c).....         | 37  |
| 5.4 Crystallographic data for <i>fac</i> -[Re(CO) <sub>3</sub> (triphos-Ph)][OTf] (4)..... | 75  |
| 5.5 Crystallographic data for <i>fac</i> -[Re(CO) <sub>3</sub> (2)][OTf] (5).....          | 91  |
| 6 Absorption and Emission Spectroscopy .....                                               | 116 |
| 6.1 General Considerations .....                                                           | 116 |
| 6.2 Absorption and Emission Spectra .....                                                  | 116 |
| 6.3 Quantum Yield Method .....                                                             | 117 |
| 7 References.....                                                                          | 119 |

## 1 General Considerations and Chemical Analysis

All air- and/or water-sensitive reactions were performed under a nitrogen atmosphere using standard Schlenk line techniques. Tetrahydrofuran was dried over sodium/benzophenone, toluene and mesitylene dried over sodium and ethanol over magnesium ethoxide; all solvents were distilled prior to use. Pentane was purchased in an anhydrous state. All starting materials were purchased from Aldrich, Acros Organics, Alfa Aesar, Strem or Johnson Matthey and used as received. Reference 4,4-difluoro-8-phenyl-1,3,5,7-tetramethyl-2,6-diethyl-4-bora-3a,4a-diaza-s-indacene,<sup>1</sup> [Pt(norbornene)<sub>3</sub>],<sup>2</sup> *mer*-[ReCl(CO)<sub>3</sub>(PPh<sub>3</sub>)<sub>2</sub>],<sup>3</sup> [ReBr(CO)<sub>3</sub>(3,4-diaminobenzoic acid)],<sup>4</sup> and [Re(CO)<sub>5</sub>][OTf]<sup>5</sup> were prepared according to literature procedures. The experimental procedure and characterisation data for **2** and detailed crystallographic data for **3a** are given in our initial report.<sup>6</sup>

Flash chromatography was performed on silica gel from Fluorochem (silica gel, 40-63u, 60A, LC301). Thin-layer chromatography was performed on Fisher aluminium-based plates with silica gel and fluorescent indicator (254 nm). Melting points were determined in open glass capillary tubes on a Stuart SMP3 melting point apparatus. <sup>1</sup>H, <sup>13</sup>C {<sup>1</sup>H}, <sup>31</sup>P {<sup>1</sup>H}, and <sup>11</sup>B {<sup>1</sup>H} NMR spectra were recorded on a JEOL Lambda 500 (<sup>1</sup>H 500.16 MHz) or JEOL ECS-400 (<sup>1</sup>H 399.78 MHz) spectrometer at room temperature (21°C) using the indicated solvent as internal reference; <sup>1</sup>H and <sup>13</sup>C shifts were relative to tetramethylsilane, <sup>31</sup>P relative to 80% H<sub>3</sub>PO<sub>4</sub>, and <sup>11</sup>B relative to BF<sub>3</sub>.Et<sub>2</sub>O. Infrared spectra were recorded on a Varian 800 FT-IR spectrometer and mass spectrometry was carried out by the EPSRC National Mass Spectrometry Service Centre, Swansea.

## 2 Experimental Procedures

### 2.1 *cis,mer*(1)-[ReCl(CO)<sub>2</sub>(2)](3a)

8-(4-(Bis-2-ethyl-diphenylphosphino)-phenylphosphino)-4,4-dimethyl-1,3,5,7-tetramethyl-2,6-diethyl-4-bora-3a,4a-diaza-*s*-indacene (0.050 g, 0.060 mmol) and [ReCl(CO)<sub>3</sub>(PPh<sub>3</sub>)<sub>2</sub>] (0.050 g, 0.060 mmol) were dissolved in anhydrous mesitylene (2 mL) and stirred at reflux for four hours. After passing the reaction mixture through a pad of silica, eluting first with hexane, followed by dichloromethane, an orange solid was obtained (0.051 g, 82%). A sample suitable for X-ray crystallographic analysis was obtained from tetrahydrofuran/pentane. <sup>1</sup>H NMR (500 MHz, CDCl<sub>3</sub>) δ 7.78-7.75 (m, 4H), 7.53-7.45 (m, 6H), 7.40-7.24 (m, 14H), 3.52-3.40 (m, 2H), 2.88-2.84 (m, 2H), 2.58-2.47 (m, 4H), 2.45 (s, 6H), 2.30 (q, <sup>3</sup>J<sub>HH</sub> = 7.3 Hz, 4H), 1.14 (s, 6H), 0.99 (t, <sup>3</sup>J<sub>HH</sub> = 7.3 Hz, 6H), 0.26 (s, 6H) ppm; <sup>13</sup>C{<sup>1</sup>H} NMR (126 MHz, CDCl<sub>3</sub>) δ 201.8 (dt, <sup>2</sup>J<sub>CP</sub> = 59.6 Hz, <sup>2</sup>J<sub>CP</sub> = 6.3 Hz, CO), 196.2 (m, CO), 151.1, 140.0, 138.7, 137.8 (m), 134.4 (m), 133.3-131.7 (overlapping m), 129.8-128.2 (overlapping m), 33.1 (m), 25.5 (dt, <sup>1</sup>J<sub>CP</sub> = 28.8 Hz, <sup>2</sup>J<sub>CP</sub> = 6.6 Hz), 17.6, 14.8, 14.4, 11.8, 10.5 ppm; <sup>31</sup>P{<sup>1</sup>H} NMR (202 MHz, CDCl<sub>3</sub>) δ 79.8 (1P), 37.7 (2P) ppm; <sup>11</sup>B{<sup>1</sup>H} NMR (160 MHz, CDCl<sub>3</sub>) δ -2.0 ppm; IR (neat):  $\tilde{\nu}$  = 1933 (s, CO), 1852 (s, CO) cm<sup>-1</sup>; HRMS (ESI<sup>+</sup>) calc. for C<sub>55</sub>H<sub>61</sub>B<sub>1</sub>Cl<sub>1</sub>N<sub>2</sub>O<sub>2</sub>P<sub>3</sub>Re<sub>1</sub> [M+H]<sup>+</sup> requires *m/z* 1104.3288, found *m/z* 1104.3284 (0.4 ppm).

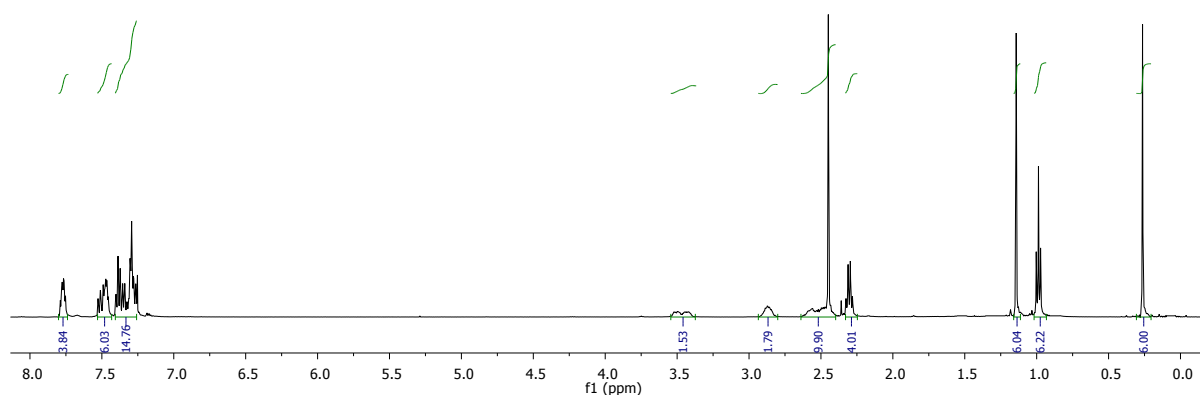

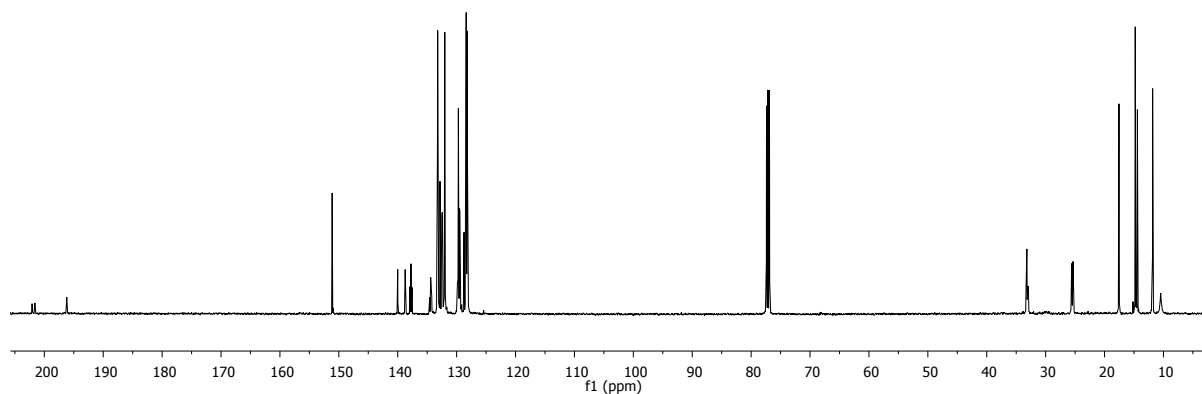

## 2.2 *cis,mer(2)-[ReCl(CO)<sub>2</sub>(2)] (3b)*

8-(4-(Bis-2-ethylphenylphosphino)-phenylphosphino)-4,4-dimethyl-1,3,5,7-tetramethyl-2,6-diethyl-4-bora-3a,4a-diaza-*s*-indacene (0.050 g, 0.060 mmol) and  $[\text{ReCl}(\text{CO})_3(\text{PPh}_3)_2]$  (0.050 g, 0.060 mmol) were dissolved in anhydrous toluene (5 mL) and stirred at reflux for seven hours. Purification was performed by column chromatography on silica gel (hexane/dichloromethane 1:1,  $R_f = 0.5$ ) to produce an orange solid (0.044 g, 67%). A sample suitable for X-ray crystallographic analysis was obtained from tetrahydrofuran/pentane.  $^1\text{H}$  NMR (500 MHz,  $\text{CDCl}_3$ )  $\delta$  8.07-8.04 (m, 2H), 7.69-7.65 (m, 8H), 7.42-7.20 (m, 14H), 3.58-3.46 (m, 2H), 3.00-2.94 (m, 2H), 2.46-2.36 (br, 4H), 2.44 (s, 6H), 2.29 (q,  $^3J_{\text{HH}} = 7.3$  Hz, 4H), 1.18 (s, 6H), 0.98 (t,  $^3J_{\text{HH}} = 7.3$  Hz, 6H), 0.28 (s, 6H) ppm;  $^{13}\text{C}\{^1\text{H}\}$  NMR (126 MHz,  $\text{CDCl}_3$ )  $\delta$  202.5 (dt,  $^2J_{\text{CP}} = 63.7$  Hz), 190.0 (m, CO), 151.0, 140.2, 139.1 (m), 134.3-131.1 (overlapping m), 129.9-128.0 (overlapping m), 33.8 (m), 30.2 (m,  $J_{\text{CP}} = 31.9$  Hz,  $J_{\text{CP}} = 8.0$  Hz), 17.5, 14.8, 14.4, 11.9, 10.4 ppm;  $^{31}\text{P}\{^1\text{H}\}$  NMR (202 MHz,  $\text{CDCl}_3$ )  $\delta$  59.3 (1P), 29.6 (2P) ppm;  $^{11}\text{B}\{^1\text{H}\}$  NMR (160 MHz,  $\text{CDCl}_3$ )  $\delta$  -2.0 ppm; IR (neat):  $\tilde{\nu} = 1942$  (s, CO), 1854 (s, CO)  $\text{cm}^{-1}$ ; HRMS (ESI<sup>+</sup>) calc. for  $\text{C}_{55}\text{H}_{61}\text{B}_1\text{Cl}_1\text{N}_2\text{O}_2\text{P}_3\text{Re}_1$   $[\text{M}+\text{H}]^+$  requires  $m/z$  1104.3288, found  $m/z$  1104.3286 (0.2 ppm).

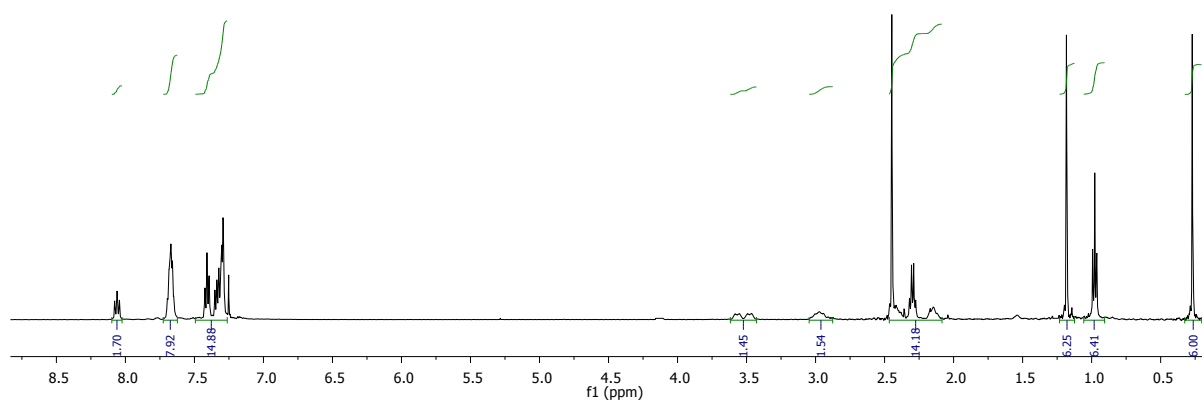

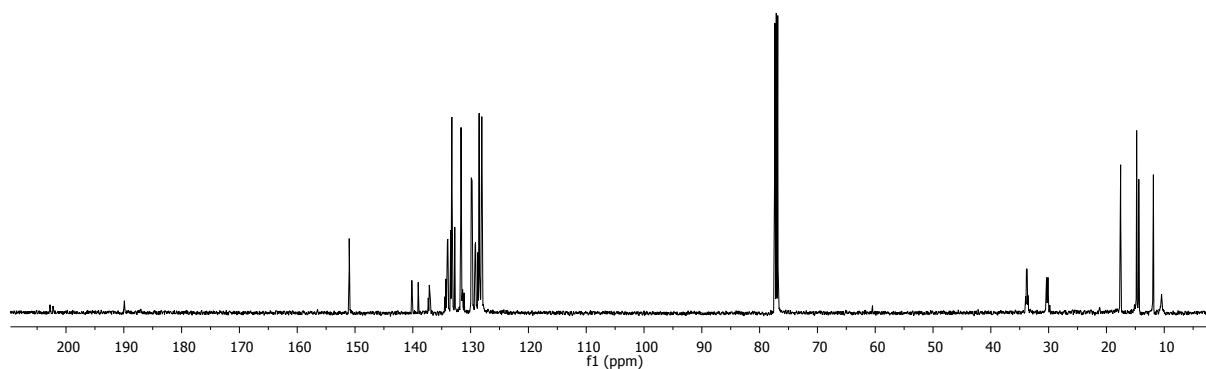

### 2.3 *cis,fac*-[ReCl(CO)<sub>2</sub>(2)] (3c)

Prepared in the same manner as **3b**. Purification was performed by column chromatography on silica gel (dichloromethane,  $R_f = 0.4$ ) to produce an orange solid (0.003 g, 4.5%). A sample suitable for X-ray crystallographic analysis was obtained from tetrahydrofuran/pentane. <sup>1</sup>H NMR (400 MHz, CDCl<sub>3</sub>) δ 7.95-7.91 (m, 4H), 7.59-7.55 (m, 2H), 7.38-7.29 (m, 12H), 6.99-6.97 (m, 2H), 6.87-6.83 (m, 4H), 2.86-2.52 (br, 8H), 2.42 (s, 6H), 2.38 (q, <sup>3</sup>J<sub>HH</sub> = 7.3 Hz, 4H), 1.18 (s, 6H), 0.93 (t, <sup>3</sup>J<sub>HH</sub> = 7.3 Hz, 6H), 0.25 (s, 6H) ppm; <sup>31</sup>P{<sup>1</sup>H} NMR (161 MHz, CDCl<sub>3</sub>) δ 68.1 (t, <sup>2</sup>J<sub>PP</sub> = 7.4 Hz, 1P), 13.3 (d, <sup>2</sup>J<sub>PP</sub> = 7.4 Hz, 2P) ppm; <sup>11</sup>B{<sup>1</sup>H} NMR (128 MHz, CDCl<sub>3</sub>) δ -2.0 ppm; IR (neat):  $\tilde{\nu} = 1941$  (s, CO), 1876 (s, CO) cm<sup>-1</sup>; HRMS (ESI<sup>+</sup>) calc. for C<sub>55</sub>H<sub>61</sub>B<sub>1</sub>Cl<sub>1</sub>N<sub>2</sub>O<sub>2</sub>P<sub>3</sub>Re<sub>1</sub> [M+NH<sub>4</sub>]<sup>+</sup> requires  $m/z$  11121.3553, found  $m/z$  1121.3555 (0.1 ppm).

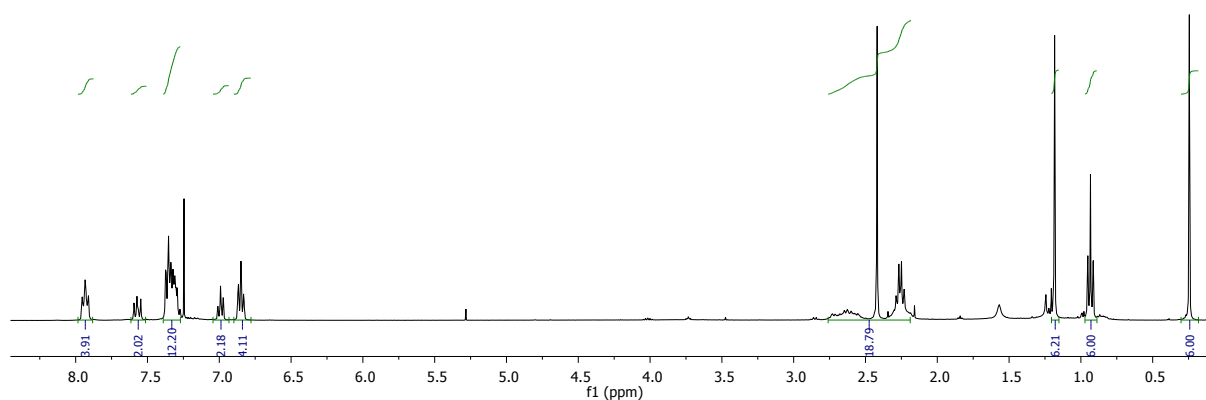

### 2.4 *fac*-[Re(CO)<sub>3</sub>(triphos-Ph)][OTf] (4)

[Re(CO)<sub>5</sub>][OTf] (0.015 g, 0.032 mmol) and triphos-Ph (0.017 g, 0.031 mmol) were added to a darkened flask and stirred at reflux in anhydrous ethanol (3 mL) for two hours, under nitrogen. The complex was purified using silica gel flash column chromatography with a

gradient from 1-5% ethanol in dichloromethane (dichloromethane/ethanol 100:3,  $R_f = 0.1$ ) to yield a powdery white solid. This material was dissolved in ethanol/water and passed through a 3 mL PrepSep C18 cartridge, which had been equilibrated in water; the product was rinsed with 30% methanol in water to remove impurities and the product was eluted by flushing with methanol. Fractions containing pure product were combined and the solvent was removed to yield an off-white solid (0.010 g, 34%). A sample suitable for X-ray crystallographic analysis was obtained from tetrahydrofuran/pentane (slow diffusion).

**$^1\text{H}$  NMR** (500 MHz,  $\text{CDCl}_3$ )  $\delta$  7.79 (m, 2H), 7.53 (s, 2H), 7.44-7.37 (m, 11H), 7.19-7.11 (m, 6H), 7.01-6.99 (m, 4H), 3.95 (m, 1H), 3.20 (m, 1H), 2.72 (br, 2H), 2.07 (br, 4H) ppm;  **$^{13}\text{C}\{^1\text{H}\}$  NMR** (126 MHz,  $\text{CDCl}_3$ )  $\delta$  194.1 (dt,  $^2J_{\text{CP}} = 36.8$  Hz), 188.6 (m, CO), 134.4 (m), 132.4, 132.0 (d,  $J_{\text{CP}} = 11.1$  Hz), 131.1, 130.6, 129.8 (d,  $J_{\text{CP}} = 11.1$  Hz), 129.3 (d,  $J_{\text{CP}} = 4.8$  Hz), 127.0, 120.9 (q,  $^1J_{\text{CF}} = 332.2$  Hz,  $\text{CF}_3$ ), 29.4 (m), 27.2 (m) ppm;  **$^{31}\text{P}\{^1\text{H}\}$  NMR** (202 MHz,  $\text{CDCl}_3$ )  $\delta$  66.4 (1P), 28.2 (2P) ppm; **IR** (neat):  $\tilde{\nu} = 2957$  (w), 2921 (w), 2851 (w), 2029 (s, CO), 1953 (s, CO), 1932 (s, CO), 1436 (m), 1260 (s), 1228 (w), 1147 (w), 1096 (m), 1030 (s), 999 (m), 806 (s)  $\text{cm}^{-1}$ ; **HRMS** (ESI $^+$ ) calcd for  $\text{C}_{37}\text{H}_{33}\text{O}_3\text{P}_3\text{Re}_1$   $[\text{M}]^+$  requires  $m/z$  803.1167, found  $m/z$  803.1167 (0.0 ppm).

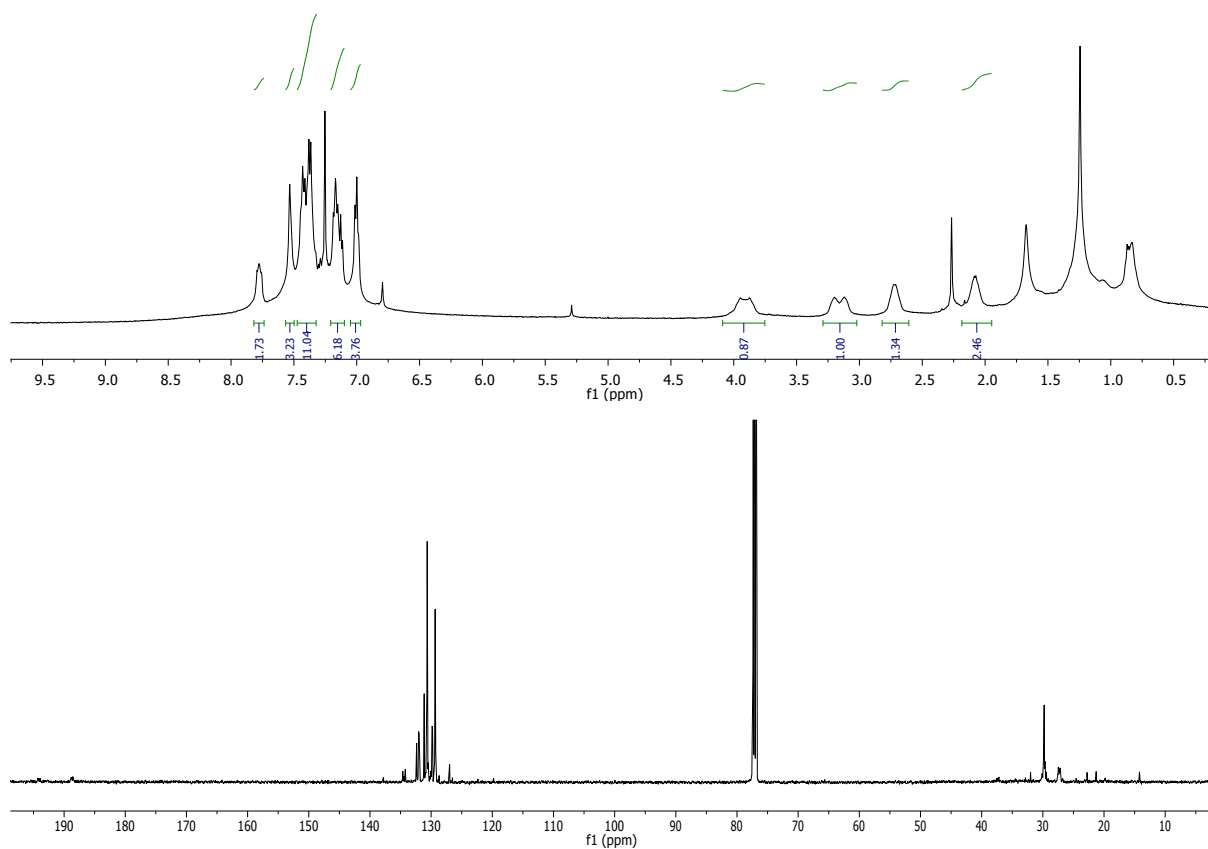

## 2.5 *fac*-[Re(CO)<sub>3</sub>(2)][OTf] (5)

### Method A:

[ReBr(CO)<sub>3</sub>(3,4-diaminobenzoic acid)] (0.050 g, 0.100 mmol, 1.0 eq) and silver triflate (0.026 g, 0.100 mmol) were added to a darkened flask and stirred at room temperature in anhydrous ethanol (3 mL) for two hours, under nitrogen. A solid of silver bromide precipitated, which was filtered. To the filtrate, 8-(4-(bis-2-ethyldiphenylphosphino)-phenylphosphine)-4,4-dimethyl-1,3,5,7-tetramethyl-2,6-diethyl-4-bora-3a,4a-diaza-*s*-indacene (0.083 g, 0.100 mmol, 1.0 eq) was added and the reaction was stirred at 65 °C for 4 hours. The complex was purified using column chromatography on silica gel (chloroform/methanol 100:6,  $R_f = 0.1$ ) to afford an orange solid (0.104 g, 84%). A sample suitable for X-ray crystallographic analysis was obtained from ethanol/pentane (slow diffusion).

### Method B:

[Re(CO)<sub>5</sub>][OTf] (0.018 g, 0.037 mmol) and 8-(4-(bis-2-ethyldiphenylphosphino)-phenylphosphine)-4,4-dimethyl-1,3,5,7-tetramethyl-2,6-diethyl-4-bora-3a,4a-diaza-*s*-indacene (0.030 g, 0.037 mmol) were added to a darkened flask and stirred at reflux in anhydrous ethanol (3 mL) for three hours, under nitrogen. The solvent was removed and the crude residue was purified by silica gel flash column chromatography with a gradient from 1-5% ethanol in dichloromethane (dichloromethane/ethanol 100:4,  $R_f = 0.1$ ) to yield an amorphous deep red solid. This material was dissolved in ethanol/water and passed through a 3 mL PrepSep C18 cartridge, which had been equilibrated in water; the product was eluted by increasing the ratio of ethanol in water in 25% increments. Fractions containing pure product were combined and the solvent was removed to yield a deep red, glassy solid (0.013 g, 29%).

**<sup>1</sup>H NMR** (500 MHz, CDCl<sub>3</sub>) δ 7.71 (m, 2H), 7.50-7.40 (m, 12H), 7.19-7.11 (m, 6H), 7.02-6.97 (m, 4H), 3.96 (m, 1H), 3.21 (m, 1H), 2.85 (m, 2H), 2.43 (s, 6H), 2.28 (br, 4H), 2.29 (q, <sup>3</sup> $J_{\text{HH}} = 7.8$  Hz, 4H), 1.19 (s, 6H), 0.96 (t, <sup>3</sup> $J_{\text{HH}} = 7.8$  Hz, 6H), 0.26 (s, 6H) ppm; **<sup>13</sup>C{<sup>1</sup>H} NMR** (126 MHz, CDCl<sub>3</sub>) δ 194.1 (dt, <sup>2</sup> $J_{\text{CP}} = 42.0$  Hz, <sup>2</sup> $J_{\text{CP}} = 8.6$  Hz, CO), 188.7 (m, CO), 151.4, 141.5 (d,  $J_{\text{CP}} = 2.6$  Hz), 137.9, 134.6, 134.2, 133.3 (d,  $J_{\text{CP}} = 40.9$  Hz), 131.3, 131.0 (d,  $J_{\text{CP}} = 10.5$  Hz), 130.9 (pseudo t,  $J_{\text{CP}} = 5.1$  Hz), 130.7, 130.6 (pseudo t,  $J_{\text{CP}} = 5.1$  Hz), 130.4 (d,  $J_{\text{CP}} = 10.7$  Hz), 129.4 (overlapping m), 128.7, 121.1 (q, <sup>1</sup> $J_{\text{CF}} = 320.2$  Hz, CF<sub>3</sub>), 29.7, 28.6 (m), 28.3 (m), 27.5 (m), 17.5, 14.7, 14.4, 12.0, 10.4 ppm; **<sup>31</sup>P{<sup>1</sup>H} NMR** (202 MHz, CDCl<sub>3</sub>) δ 65.1 (1P), 29.5 (2P) ppm; **<sup>11</sup>B NMR** (128 MHz, CDCl<sub>3</sub>) δ -1.8 ppm; **IR** (neat):  $\tilde{\nu} = 2964$  (w), 2927 (w), 2854 (w), 2035 (s), 1946 (s), 1910 (s), 1558 (m), 1436 (w), 1361 (m), 1322 (m),

1259 (w), 1174 (s), 1147 (m), 1112 (m), 1030 (m), 983 (s), 946 (s)  $\text{cm}^{-1}$ ; **HRMS** (ESI<sup>+</sup>) calcd for  $\text{C}_{56}\text{H}_{60}\text{B}_1\text{N}_2\text{O}_3\text{P}_3\text{Re}_1$   $[\text{M}]^+$  requires  $m/z$  1096.3470, found  $m/z$  1096.3460 (0.9 ppm).

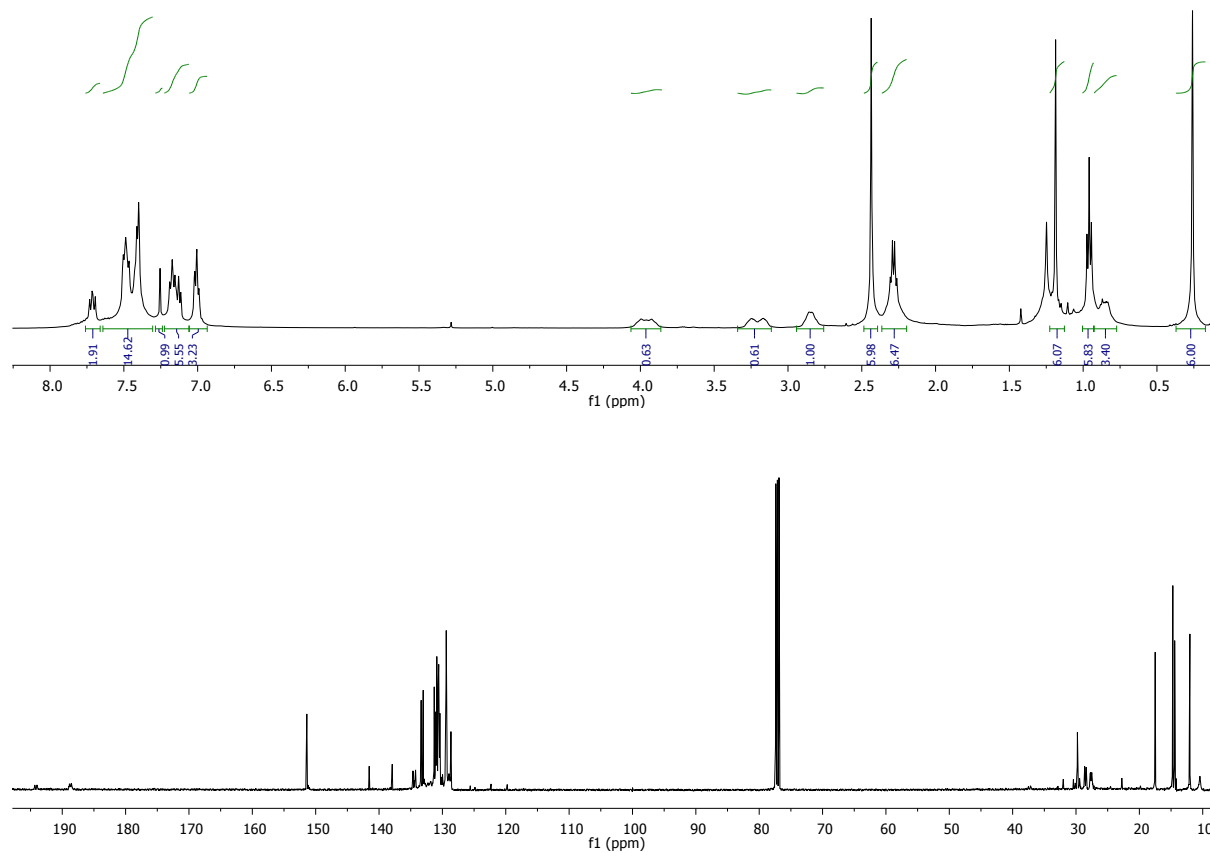



### 3 Radiochemistry

#### 3.1 General Experimental Considerations

$[\text{}^{99\text{m}}\text{TcO}_4]^-$  (9.5-10 mCi) was obtained from Cardinal Health (Spokane, WA) and was used to prepare  $\text{fac-}[\text{}^{99\text{m}}\text{Tc}(\text{CO})_3(\text{OH}_2)_3]^+$  via commercially available Isolink® kits (Tyco, Inc.) as previously described.<sup>7</sup> A Perkin-Elmer Series 200 analytical chromatography system equipped with a Perkin-Elmer Radiomatic 610TR detector and a Hitachi D-7000 series analytical chromatography system (L-7100 pump, L-7400 UV detector) equipped with a Berthold FlowStar LB 513 radiodetector were used during reversed-phase HPLC (RP-HPLC) analysis of the rhenium and technetium complexes. Analytical separation and identification of the complexes were conducted using a Varian Pursuit XRs column (C18, 5  $\mu\text{m}$ , 4.6  $\times$  250 mm) and a Phenomenex security guard cartridge (C18, 4.0  $\times$  3.0 mm) with the following gradient method and conditions: solvent A, 0.1% trifluoroacetic acid (TFA) in water; solvent B, methanol; 1 mL/min flow rate; 0-3 min 100% A, 3-9 min 75% A/25% B, 9-20 min linear gradient to 100% B, 9-25 min hold 100% B, step to 100% A at 30 min and equilibrate.

#### 3.2 $\text{fac-}[\text{}^{99\text{m}}\text{Tc}(\text{CO})_3(\text{triphos-Ph})]^+$ (6)

Ethanol stock solutions of triphos-Ph ( $9.7 \times 10^{-3}$  M to  $9.7 \times 10^{-5}$  M, 5  $\mu\text{L}$ ), ethanol (245  $\mu\text{L}$ ) and 10 mM pH 7.2 sodium phosphate buffer (200  $\mu\text{L}$ ) were added to 5 mL sealable labelling vials. The vials were sealed and purged with nitrogen for 5 min and a solution of  $\text{fac-}[\text{}^{99\text{m}}\text{Tc}(\text{CO})_3(\text{OH}_2)_3]^+$  (50  $\mu\text{L}$ , 200-920  $\mu\text{Ci}$ ) was added to the vial to bring the total volume to 0.5 mL, with final concentrations of triphos-Ph at  $1 \times 10^{-4}$  M to  $1 \times 10^{-6}$  M (constant 1:1 ratio of ethanol:aqueous solution). The vials were then heated at 85  $^\circ\text{C}$  with periodic analysis by RP-HPLC.

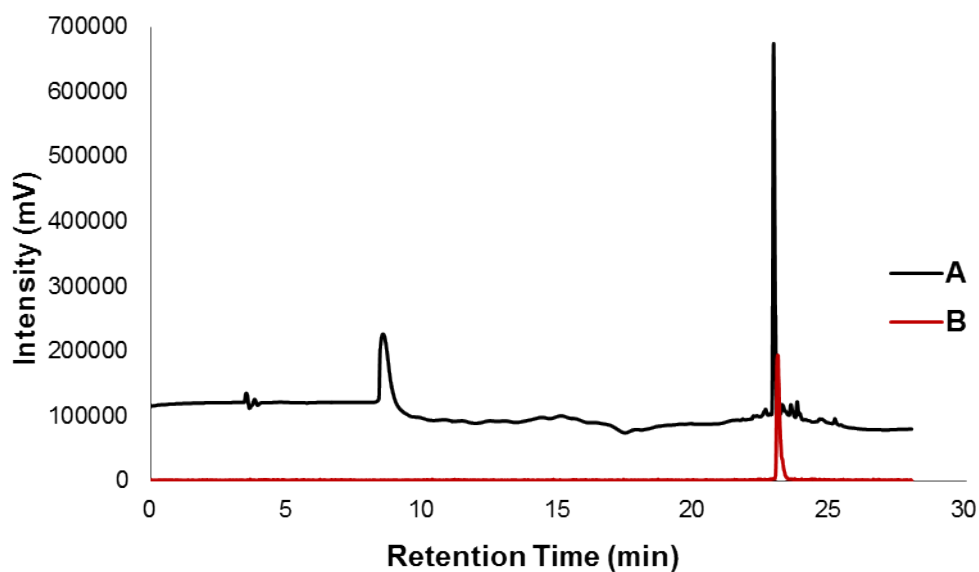

**Fig. 3.1.** Overlay of HPLC chromatograms from the crude reactions between triphos-Ph and  $[\text{Re}(\text{CO})_5]^+$  (black trace, UV, 220 nm) or  $\text{fac}-[{}^{99\text{m}}\text{Tc}(\text{CO})_3(\text{OH}_2)_3]^+$  (red trace, NaI  $\gamma$ -detector) to yield  $\text{fac}-[\text{Re}(\text{CO})_3(\text{triphos-Ph})]^+$  (**4**) at 22.9 min (A) or  $\text{fac}-[{}^{99\text{m}}\text{Tc}(\text{CO})_3(\text{triphos-Ph})]^+$  (**6**) at 23.0 min (B), respectively.

### 3.3 $\text{fac}-[{}^{99\text{m}}\text{Tc}(\text{CO})_3(\mathbf{2})]^+$ (**7**)

#### $\text{fac}-[{}^{99\text{m}}\text{Tc}(\text{CO})_3(\mathbf{2})]^+$ (**7**)

Ethanol stock solutions of **2** ( $8.45 \times 10^{-4}$  M or  $8.45 \times 10^{-5}$  M, 6  $\mu\text{L}$ ) and ethanol (444  $\mu\text{L}$ ) were added to 5 mL sealable labelling vials. The vials were sealed and purged with nitrogen for 5 min and a solution of  $\text{fac}-[{}^{99\text{m}}\text{Tc}(\text{CO})_3(\text{OH}_2)_3]^+$  (50  $\mu\text{L}$ , 150-300  $\mu\text{Ci}$ ) was added to the vial to bring the total volume to 0.5 mL, with final concentrations of **2** at  $1 \times 10^{-5}$  M or  $1 \times 10^{-6}$  M. The vials were then heated at 85  $^\circ\text{C}$  with periodic analysis by RP-HPLC.

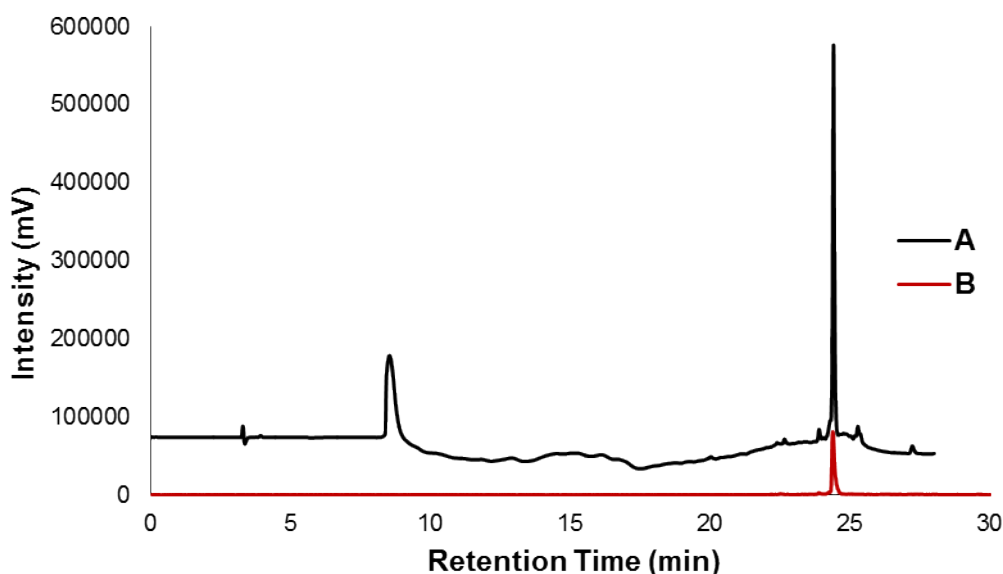

**Fig. 3.2.** Overlay of HPLC chromatograms from the crude reactions between **2** and  $[\text{Re}(\text{CO})_5]^+$  (black trace; UV, 220 nm) or  $\text{fac}-[^{99\text{m}}\text{Tc}(\text{CO})_3(\text{OH}_2)_3]^+$  (red trace, NaI  $\gamma$ -detector) to yield  $\text{fac}-[\text{Re}(\text{CO})_3(\mathbf{2})]^+$  (**5**) at 24.4 min (A) or  $\text{fac}-[^{99\text{m}}\text{Tc}(\text{CO})_3(\mathbf{2})]^+$  (**7**) at 24.5 min (B), respectively.

### 3.4 Stability Analysis

RP-HPLC purified solutions of **6** or **7** (200-250  $\mu\text{L}$ ) were added to an equal volume of 10 mM pH 7.2 sodium phosphate buffer or to solutions containing  $L$ -histidine or  $L$ -cysteine at 2 mM in 10 mM pH 7.2 sodium phosphate buffer in a sealable labelling vial (0.4-0.5 mL final solution volume). The vials were sealed, degassed with nitrogen, and incubated at 37  $^\circ\text{C}$ . Aliquots were periodically withdrawn and analysed by RP-HPLC to determine the stability of the parent peak to transchelation or degradation.

**Table 3.1.** Radiolabeling conversion<sup>a</sup> from the  $\text{fac}-[^{99\text{m}}\text{Tc}(\text{CO})_3(\text{OH}_2)_3]^+$  precursor based on starting concentrations of triphos-Ph or ligand **2** to form **6** or **7**, respectively. Reactions were heated at 85  $^\circ\text{C}$  and then allowed to cool briefly before aliquots were removed at the time points shown, for analysis by RP-HPLC.

| Starting ligand concentration | <b>6</b> |        | <b>7</b> |        |
|-------------------------------|----------|--------|----------|--------|
|                               | 30 min   | 60 min | 30 min   | 60 min |
| <b>10<sup>-4</sup> M</b>      | >98%     | >99%   | --       | --     |
| <b>10<sup>-5</sup> M</b>      | >98%     | >99%   | >98%     | >99%   |
| <b>10<sup>-6</sup> M</b>      | 40%      | 83%    | 86%      | 93%    |

<sup>a</sup>Radiochemical conversion (%) =  $((1 - (\text{radiochemical area of the remaining } \text{fac}-[^{99\text{m}}\text{Tc}(\text{CO})_3(\text{OH}_2)_3]^+ \text{ precursor} / \text{radiochemical area of the entire chromatogram})) \times 100$ .

**Table 3.2.** Stability analysis of RP-HPLC purified **6** and **7** following incubation at 37 °C in 10 mM pH 7.2 sodium phosphate buffer or in 10 mM pH 7.2 sodium phosphate buffer containing 1 mM histidine or 1 mM cysteine. Aliquots of the solutions were removed at the time points shown for analysis by RP-HPLC.

| Solution                | <b>6</b> |      |        | <b>7</b> |      |        |
|-------------------------|----------|------|--------|----------|------|--------|
|                         | 2 h      | 4 h  | 18.5 h | 2 h      | 4 h  | 19.5 h |
| sodium phosphate buffer | >99%     | >99% | >99%   | >99%     | 99%  | >99%   |
| 1 mM histidine          | >99%     | 89%  | >99%   | >99%     | 97%  | >99%   |
| 1 mM cysteine           | >99%     | 97%  | >99%   | >99%     | >99% | >99%   |

## 4 Cell Imaging

### 4.1 Cell Culturing and Cell Preparation

Cells were cultured at 37 °C in a humidified atmosphere in air and diluted once confluence had been reached. Culture occurred in RPMI (Roswell Park Memorial Institute) 1640 medium for PC3 (prostate cancer cells). The media contained 10% foetal calf serum (FCS), 0.5% penicillin/streptomycin (10,000 IU mL<sup>-1</sup>/10,000 mg mL<sup>-1</sup>) and 200 mM L-Glutamine (5 mL). All steps were performed in absence of phenol red. Surplus supernatant containing dead cell matter and excess protein was aspirated. The live adherent cells were then washed with 2 x 10 mL aliquots of phosphate buffer saline (PBS) solution to remove any remaining media containing FCS, which inactivates trypsin. Cells were resuspended in solution by incubation in 3 mL of trypsin–PBS solution (0.25% trypsin) for 5 min at 37 °C. After trypsinisation, 5 mL of medium containing 10% serum was added to inactivate the trypsin and the solution was centrifuged for 5 min (1000 rpm, 25 °C) to remove any remaining dead cell matter. The supernatant liquid was aspirated and 5 mL of cell medium (10% FCS) was added to the cell matter left behind. Cells were counted using a haemocytometer and then seeded as appropriate.

### 4.2 MTT Assays

Cells cultured as above were plated ( $5 \times 10^4$  cells mL<sup>-1</sup>) and left for 48 h to adhere fully. All steps were carried out in the absence of phenol red. (a) For MI<sub>50</sub> estimations by MTT assays, cells were incubated with each compound tested for 48 h at 37 °C. Concentrations used were 1 nM, 50 nM, 100 nM, 1 µM, 10 µM, 50 µM, 100 µM and 250 µM (1% DMSO, 99% Eagle's Modified Essential Medium containing FCS at standard concentration of the cell line). Subsequently, cells were washed three times with PBS and 100 µL of MTT were added (0.5 mg mL<sup>-1</sup>, 10% PBS:SFM) followed by a 2 h incubation. Following aspiration, 100 µL of DMSO was added and 96 well plates were read at an ELISA plate reader, Fluostar Omega BMGLabTech. Data were obtained from at least three consistent results and MI<sub>50</sub> was calculated using Origin 8 as half the height of the fitted curve for each compound and for each individual experiment. Due to background absorbance, 100% cell death would not correspond to zero absorbance, therefore the height of the curve was calculated as the highest absorbance of the fit plot minus the minimum absorbance of the curve, at which point death of all cells has been achieved. This value therefore indicates the minimum MI<sub>50</sub> for this

compound and is stated in the text/figure legend. The mean  $MI_{50}$  was calculated from the average of the five  $MI_{50}$  values obtained from five consistent experiments. The error reported was the standard error of the mean and shown as  $\pm$  S.E.M.

### 4.3 Fluorescence Microscopy

For confocal fluorescence microscopy experiments, cells were cultured as above and plated in glass-bottomed dishes as  $1.5 \times 10^5$  cells per dish (*ca.* 60% coverage) and incubated for 72 h. All steps were carried out in the absence of phenol red. Prior to compound addition, cells were washed three times with PBS, before adding serum free medium (SFM) or PBS (990  $\mu$ L). 10  $\mu$ L of compound in DMSO was added to give a 1% solution. The final concentration of compounds on the cell plate for example was 100  $\mu$ M in medium for a 10 mM stock solution (whereby 990  $\mu$ L SFM was added originally for obtaining a 1% solution). After 15 min incubation with the compound, the cells were washed three times with PBS, fresh SFM was added (1 mL) and followed by recording of images. Cell imaging was carried out on a Zeiss LSM510META, a modified Nikon TE2000-U or a Nikon Eclipse TE2000 epi-fluorescence instrument.

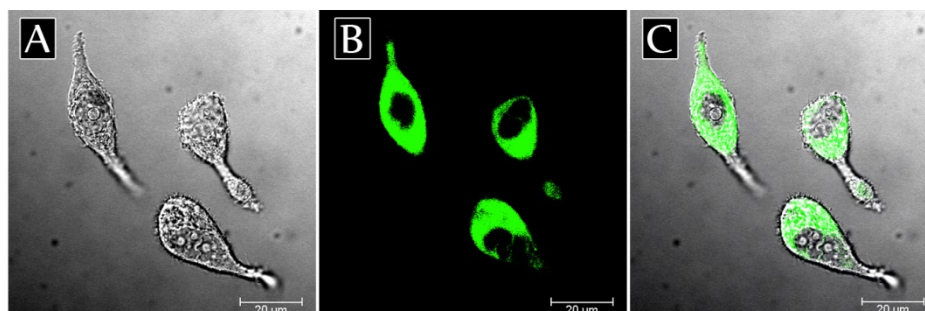

**Fig. 4.1.** Single-photon confocal microscopy images of a 10  $\mu$ M solution of tridentate phosphine, **2** in PC-3: (A) DIC image; (B) excitation at 488 nm, long pass filtered at 510 nm, (C) an overlay of the previous three images.

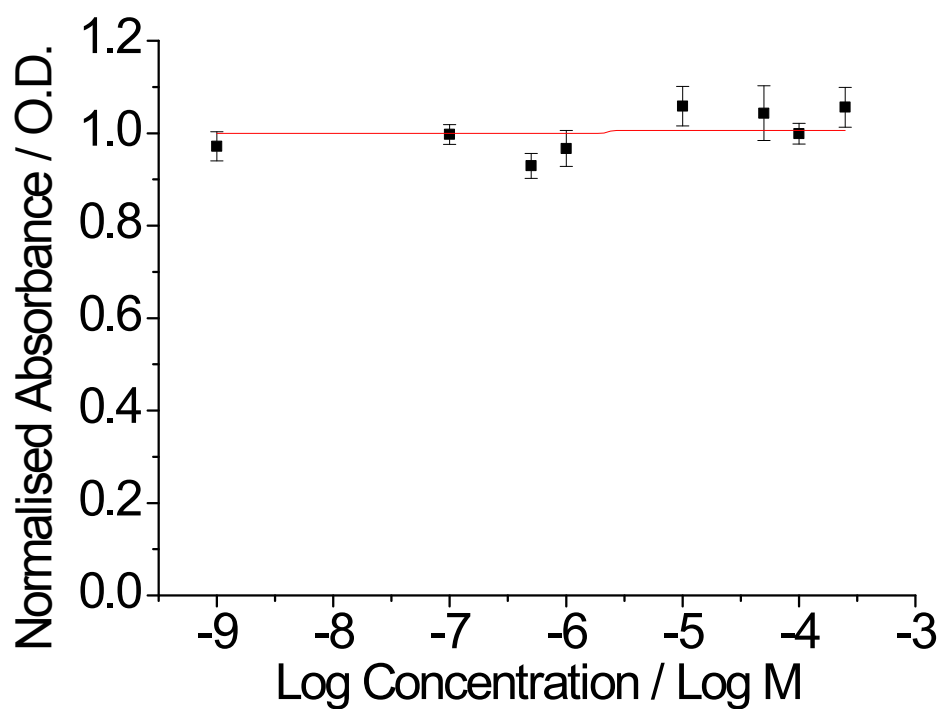

**Fig. 4.2.** MTT assays of *cis,mer*-[ReCl(CO)<sub>2</sub>(2)], **3a**, in PC-3 cells, whereby the MI<sub>50</sub> was determined to be > 250 μM.

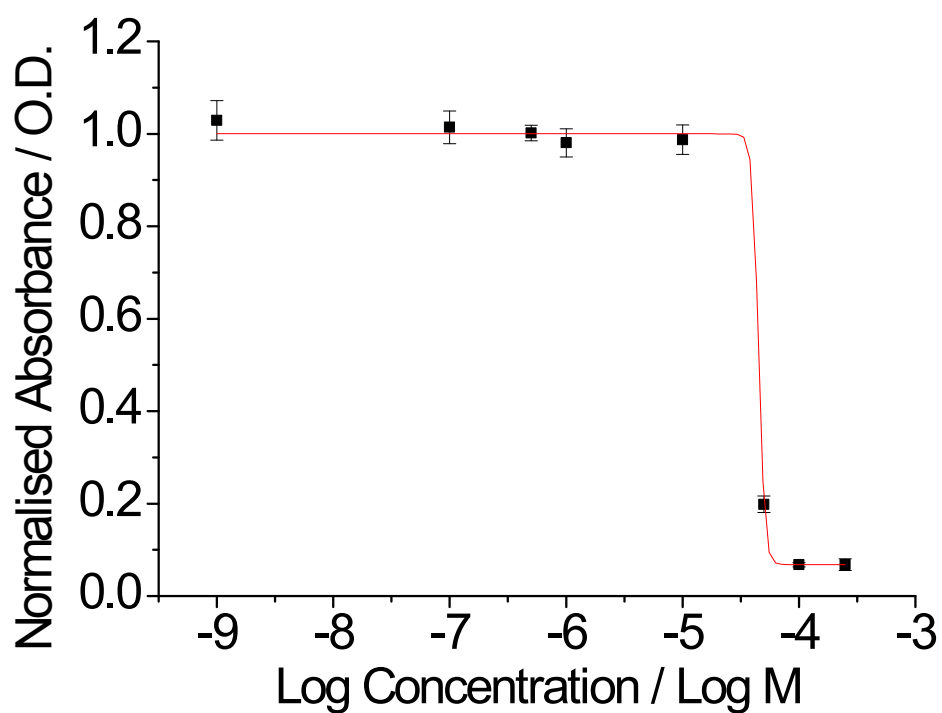

**Fig. 4.3.** MTT assays of *fac*-[Re(CO)<sub>3</sub>(2)][OTf], **5**, in PC-3 cells, whereby the MI<sub>50</sub> was determined to be 45 μM ± 5 μM.

## 5 X-ray Crystallography

### 5.1 General Information

Data were collected at 150(2) K on an Agilent Technologies Gemini A Ultra diffractometer with MoK $\alpha$  ( $\lambda = 0.71073$  Å for **3a**, and **4**) or CuK $\alpha$  ( $\lambda = 1.54178$  Å, for **3b**, **3c**, and **5**) radiation.<sup>8</sup> Selected crystallographic information is given in the following tables. Absorption corrections were based on multiple and symmetry-equivalent data; the structures were solved by direct methods, and refined on all unique  $F^2$  values with appropriate constraints and/or restraints in each case, particularly for the treatment of disordered structural components.<sup>9</sup> Unidentified solvent in the structures of **3a** and **3c** was treated by the Squeeze procedure of PLATON.<sup>10</sup> CCDC references: 849753 (**3a**), 101450 (**3b**), 101449 (**3c**), 101451 (**4**) and 101452 (**5**).



## 5.2 Crystallographic data for *cis,mer*(2)-[ReCl(CO)<sub>2</sub>](2)(3b)

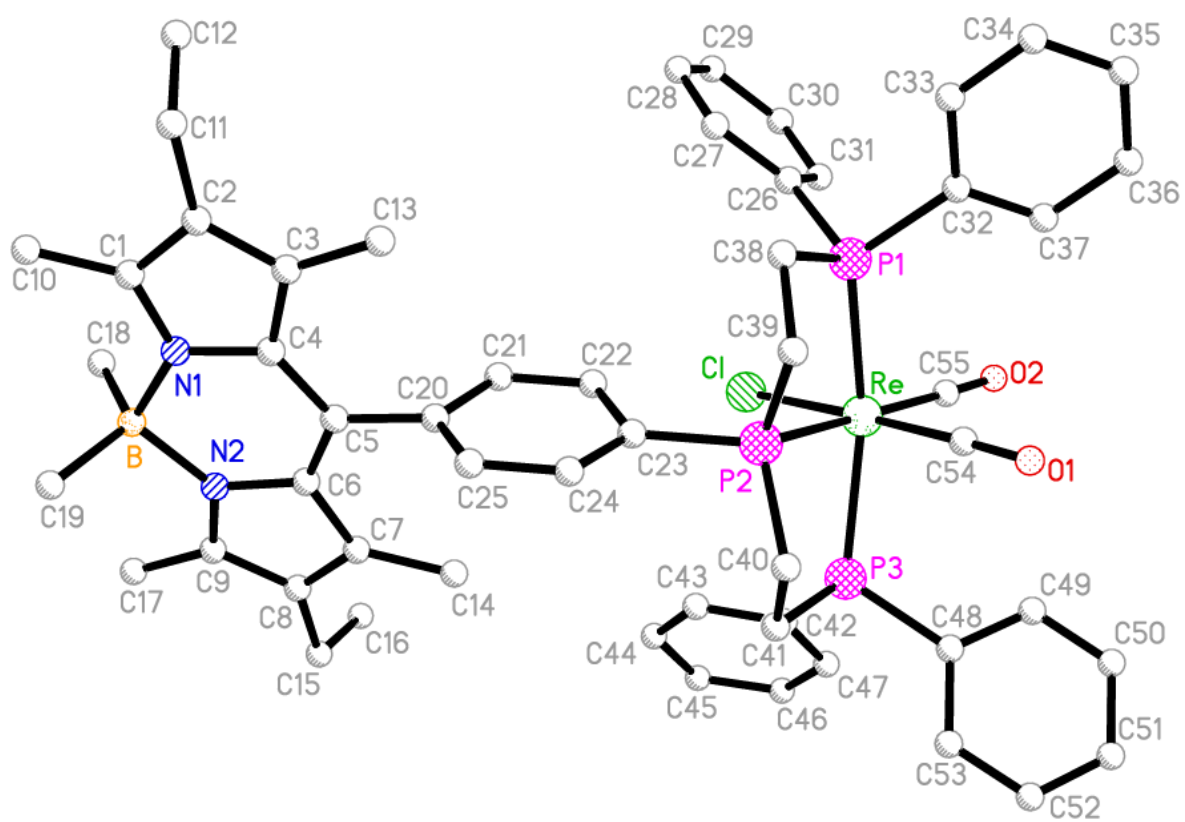

**Table 3b:1.** Crystal data and structure refinement for ljh117 (**3b**).

|                                       |                                                                                    |                            |
|---------------------------------------|------------------------------------------------------------------------------------|----------------------------|
| Identification code                   | ljh117 ( <b>3b</b> )                                                               |                            |
| Chemical formula (moiety)             | C <sub>55</sub> H <sub>60</sub> BClN <sub>2</sub> O <sub>2</sub> P <sub>3</sub> Re |                            |
| Chemical formula (total)              | C <sub>55</sub> H <sub>60</sub> BClN <sub>2</sub> O <sub>2</sub> P <sub>3</sub> Re |                            |
| Formula weight                        | 1106.42                                                                            |                            |
| Temperature                           | 150(2) K                                                                           |                            |
| Radiation, wavelength                 | CuK $\alpha$ , 1.54178 Å                                                           |                            |
| Crystal system, space group           | monoclinic, P2 <sub>1</sub> /c                                                     |                            |
| Unit cell parameters                  | a = 12.7603(4) Å                                                                   | $\alpha = 90^\circ$        |
|                                       | b = 26.1035(8) Å                                                                   | $\beta = 106.521(3)^\circ$ |
|                                       | c = 15.6208(4) Å                                                                   | $\gamma = 90^\circ$        |
| Cell volume                           | 4988.3(3) Å <sup>3</sup>                                                           |                            |
| Z                                     | 4                                                                                  |                            |
| Calculated density                    | 1.473 g/cm <sup>3</sup>                                                            |                            |
| Absorption coefficient $\mu$          | 6.500 mm <sup>-1</sup>                                                             |                            |
| F(000)                                | 2248                                                                               |                            |
| Crystal colour and size               | red, 0.15 × 0.10 × 0.02 mm <sup>3</sup>                                            |                            |
| Reflections for cell refinement       | 6037 ( $\theta$ range 3.0 to 62.3°)                                                |                            |
| Data collection method                | Agilent Technologies Gemini A Ultra<br>$\omega$ scans                              |                            |
| $\theta$ range for data collection    | 3.4 to 62.4°                                                                       |                            |
| Index ranges                          | h -11 to 14, k -29 to 27, l -17 to 16                                              |                            |
| Completeness to $\theta = 67.7^\circ$ | 85.5 %                                                                             |                            |
| Reflections collected                 | 16817                                                                              |                            |
| Independent reflections               | 7730 ( $R_{\text{int}} = 0.0413$ )                                                 |                            |
| Reflections with $F^2 > 2\sigma$      | 6049                                                                               |                            |
| Absorption correction                 | multi-scan                                                                         |                            |
| Min. and max. transmission            | 0.440 and 0.881                                                                    |                            |
| Structure solution                    | direct methods                                                                     |                            |
| Refinement method                     | Full-matrix least-squares on $F^2$                                                 |                            |
| Weighting parameters a, b             | 0.0457,                                                                            |                            |
| Data / restraints / parameters        | 7730 / 0 / 594                                                                     |                            |

|                                     |                                             |
|-------------------------------------|---------------------------------------------|
| Final R indices [ $F^2 > 2\sigma$ ] | R1 = 0.0408, wR2 = 0.0898                   |
| R indices (all data)                | R1 = 0.0589, wR2 = 0.1001                   |
| Goodness-of-fit on $F^2$            | 1.031                                       |
| Largest and mean shift/su           | 0.002 and 0.000                             |
| Largest diff. peak and hole         | 2.24 and $-1.31 \text{ e } \text{\AA}^{-3}$ |

**Table 3b:2.** Atomic coordinates and equivalent isotropic displacement parameters ( $\text{\AA}^2$ ) for ljh117 (**3b**).  $U_{\text{eq}}$  is defined as one third of the trace of the orthogonalised  $U^{\text{ij}}$  tensor.

|     | x          | y           | z          | $U_{\text{eq}}$ |
|-----|------------|-------------|------------|-----------------|
| Re  | 0.21067(2) | 0.17275(2)  | 0.47918(2) | 0.02352(9)      |
| B   | 0.2871(6)  | 0.5785(3)   | 0.5233(4)  | 0.0367(16)      |
| N1  | 0.3779(4)  | 0.5444(2)   | 0.5920(3)  | 0.0364(12)      |
| N2  | 0.1933(4)  | 0.53935(19) | 0.4761(3)  | 0.0345(12)      |
| C1  | 0.4758(5)  | 0.5607(3)   | 0.6434(4)  | 0.0423(16)      |
| C2  | 0.5353(5)  | 0.5187(3)   | 0.6911(4)  | 0.0430(17)      |
| C3  | 0.4706(5)  | 0.4754(3)   | 0.6695(4)  | 0.0400(15)      |
| C4  | 0.3712(5)  | 0.4919(2)   | 0.6059(3)  | 0.0331(14)      |
| C5  | 0.2794(5)  | 0.4636(2)   | 0.5582(3)  | 0.0333(14)      |
| C6  | 0.1949(4)  | 0.4865(2)   | 0.4938(3)  | 0.0263(12)      |
| C7  | 0.0953(5)  | 0.4646(2)   | 0.4380(4)  | 0.0330(14)      |
| C8  | 0.0399(5)  | 0.5039(3)   | 0.3853(4)  | 0.0375(15)      |
| C9  | 0.1013(5)  | 0.5494(2)   | 0.4096(4)  | 0.0372(15)      |
| C10 | 0.5141(5)  | 0.6138(3)   | 0.6513(5)  | 0.0551(19)      |
| C11 | 0.6475(5)  | 0.5218(3)   | 0.7540(4)  | 0.0522(19)      |
| C12 | 0.7381(5)  | 0.5205(4)   | 0.7083(4)  | 0.067(2)        |
| C13 | 0.4987(5)  | 0.4233(3)   | 0.7085(4)  | 0.0484(18)      |
| C14 | 0.0559(5)  | 0.4105(3)   | 0.4310(4)  | 0.0433(16)      |
| C15 | -0.0655(5) | 0.4998(3)   | 0.3116(4)  | 0.0439(16)      |
| C16 | -0.0520(5) | 0.4787(3)   | 0.2252(4)  | 0.0527(19)      |
| C17 | 0.0718(6)  | 0.6008(3)   | 0.3686(5)  | 0.0537(18)      |
| C18 | 0.3424(5)  | 0.6016(3)   | 0.4499(4)  | 0.0491(17)      |
| C19 | 0.2389(5)  | 0.6188(3)   | 0.5803(4)  | 0.0458(17)      |
| C20 | 0.2743(4)  | 0.4081(2)   | 0.5731(3)  | 0.0318(13)      |
| C21 | 0.3009(5)  | 0.3734(2)   | 0.5151(4)  | 0.0357(14)      |
| C22 | 0.2851(5)  | 0.3217(2)   | 0.5218(3)  | 0.0337(14)      |
| C23 | 0.2420(4)  | 0.3025(2)   | 0.5884(3)  | 0.0282(13)      |
| C24 | 0.2236(5)  | 0.3370(2)   | 0.6509(3)  | 0.0337(14)      |

|     |             |            |            |            |
|-----|-------------|------------|------------|------------|
| C25 | 0.2394(5)   | 0.3890(2)  | 0.6434(4)  | 0.0334(14) |
| P1  | 0.40512(11) | 0.17473(6) | 0.54507(8) | 0.0249(3)  |
| P2  | 0.22112(11) | 0.23424(6) | 0.59690(8) | 0.0246(3)  |
| P3  | 0.01767(11) | 0.18928(6) | 0.45130(9) | 0.0276(3)  |
| C26 | 0.4910(4)   | 0.2016(2)  | 0.4796(3)  | 0.0285(13) |
| C27 | 0.5657(5)   | 0.2409(3)  | 0.5081(4)  | 0.0411(16) |
| C28 | 0.6295(5)   | 0.2577(3)  | 0.4554(4)  | 0.0416(16) |
| C29 | 0.6192(5)   | 0.2362(3)  | 0.3731(4)  | 0.0407(16) |
| C30 | 0.5446(5)   | 0.1978(3)  | 0.3437(4)  | 0.0418(16) |
| C31 | 0.4794(5)   | 0.1803(2)  | 0.3957(4)  | 0.0398(15) |
| C32 | 0.4813(4)   | 0.1159(2)  | 0.5856(3)  | 0.0268(13) |
| C33 | 0.5893(5)   | 0.1188(3)  | 0.6393(4)  | 0.0371(15) |
| C34 | 0.6483(5)   | 0.0752(3)  | 0.6702(4)  | 0.0446(17) |
| C35 | 0.6023(5)   | 0.0270(3)  | 0.6475(4)  | 0.0463(17) |
| C36 | 0.4958(5)   | 0.0235(3)  | 0.5949(4)  | 0.0454(16) |
| C37 | 0.4361(5)   | 0.0686(2)  | 0.5639(4)  | 0.0360(14) |
| C38 | 0.4356(4)   | 0.2153(2)  | 0.6473(3)  | 0.0318(14) |
| C39 | 0.3396(4)   | 0.2160(2)  | 0.6882(3)  | 0.0282(13) |
| C40 | 0.0935(4)   | 0.2278(2)  | 0.6269(3)  | 0.0282(13) |
| C41 | 0.0006(4)   | 0.2335(2)  | 0.5401(3)  | 0.0323(14) |
| C42 | -0.0608(4)  | 0.2227(2)  | 0.3510(3)  | 0.0302(13) |
| C43 | -0.0383(5)  | 0.2736(2)  | 0.3373(4)  | 0.0359(14) |
| C44 | -0.0963(5)  | 0.2995(3)  | 0.2608(4)  | 0.0453(16) |
| C45 | -0.1764(5)  | 0.2746(3)  | 0.1966(4)  | 0.0437(17) |
| C46 | -0.1973(5)  | 0.2237(3)  | 0.2070(4)  | 0.0454(17) |
| C47 | -0.1405(5)  | 0.1979(3)  | 0.2838(3)  | 0.0379(15) |
| C48 | -0.0706(4)  | 0.1347(2)  | 0.4571(3)  | 0.0321(14) |
| C49 | -0.0413(5)  | 0.0854(2)  | 0.4406(4)  | 0.0371(14) |
| C50 | -0.1079(5)  | 0.0441(3)  | 0.4428(4)  | 0.0462(17) |
| C51 | -0.2051(5)  | 0.0518(3)  | 0.4628(4)  | 0.0488(17) |
| C52 | -0.2368(5)  | 0.1000(3)  | 0.4784(4)  | 0.0493(18) |
| C53 | -0.1714(5)  | 0.1417(3)  | 0.4744(4)  | 0.0406(16) |
| C54 | 0.1950(4)   | 0.1239(2)  | 0.5629(4)  | 0.0281(13) |

|     |             |             |            |            |
|-----|-------------|-------------|------------|------------|
| O1  | 0.1817(3)   | 0.09363(17) | 0.6132(3)  | 0.0427(11) |
| C55 | 0.2070(4)   | 0.1186(2)   | 0.3933(4)  | 0.0308(13) |
| O2  | 0.2077(3)   | 0.08616(18) | 0.3442(3)  | 0.0447(11) |
| Cl  | 0.22012(11) | 0.23309(6)  | 0.35675(8) | 0.0329(3)  |

**Table 3b:3.** Bond lengths [Å] and angles [°] for ljh117 (**3b**).

|          |            |          |            |
|----------|------------|----------|------------|
| Re–P1    | 2.4012(14) | Re–P2    | 2.4157(13) |
| Re–P3    | 2.4147(14) | Re–C54   | 1.878(6)   |
| Re–C55   | 1.940(6)   | Re–Cl    | 2.5068(13) |
| B–N1     | 1.605(9)   | B–N2     | 1.586(8)   |
| B–C18    | 1.624(9)   | B–C19    | 1.609(9)   |
| N1–C1    | 1.347(7)   | N1–C4    | 1.395(8)   |
| N2–C6    | 1.407(7)   | N2–C9    | 1.354(7)   |
| C1–C2    | 1.417(9)   | C1–C10   | 1.463(9)   |
| C2–C3    | 1.385(9)   | C2–C11   | 1.491(8)   |
| C3–C4    | 1.437(8)   | C3–C13   | 1.491(9)   |
| C4–C5    | 1.405(8)   | C5–C6    | 1.384(7)   |
| C5–C20   | 1.472(8)   | C6–C7    | 1.438(7)   |
| C7–C8    | 1.378(8)   | C7–C14   | 1.493(8)   |
| C8–C9    | 1.412(9)   | C8–C15   | 1.506(8)   |
| C9–C17   | 1.488(9)   | C10–H10A | 0.980      |
| C10–H10B | 0.980      | C10–H10C | 0.980      |
| C11–H11A | 0.990      | C11–H11B | 0.990      |
| C11–C12  | 1.523(8)   | C12–H12A | 0.980      |
| C12–H12B | 0.980      | C12–H12C | 0.980      |
| C13–H13A | 0.980      | C13–H13B | 0.980      |
| C13–H13C | 0.980      | C14–H14A | 0.980      |
| C14–H14B | 0.980      | C14–H14C | 0.980      |
| C15–H15A | 0.990      | C15–H15B | 0.990      |
| C15–C16  | 1.511(8)   | C16–H16A | 0.980      |
| C16–H16B | 0.980      | C16–H16C | 0.980      |
| C17–H17A | 0.980      | C17–H17B | 0.980      |
| C17–H17C | 0.980      | C18–H18A | 0.980      |
| C18–H18B | 0.980      | C18–H18C | 0.980      |
| C19–H19A | 0.980      | C19–H19B | 0.980      |
| C19–H19C | 0.980      | C20–C21  | 1.389(8)   |
| C20–C25  | 1.389(7)   | C21–H21  | 0.950      |
| C21–C22  | 1.375(8)   | C22–H22  | 0.950      |

|          |           |          |          |
|----------|-----------|----------|----------|
| C22–C23  | 1.401(7)  | C23–C24  | 1.396(7) |
| C23–P2   | 1.811(6)  | C24–H24  | 0.950    |
| C24–C25  | 1.383(8)  | C25–H25  | 0.950    |
| P1–C26   | 1.837(5)  | P1–C32   | 1.831(6) |
| P1–C38   | 1.863(5)  | P2–C39   | 1.822(5) |
| P2–C40   | 1.826(5)  | P3–C41   | 1.864(5) |
| P3–C42   | 1.824(6)  | P3–C48   | 1.833(6) |
| C26–C27  | 1.385(8)  | C26–C31  | 1.393(8) |
| C27–H27  | 0.950     | C27–C28  | 1.383(8) |
| C28–H28  | 0.950     | C28–C29  | 1.374(8) |
| C29–H29  | 0.950     | C29–C30  | 1.370(9) |
| C30–H30  | 0.950     | C30–C31  | 1.394(8) |
| C31–H31  | 0.950     | C32–C33  | 1.396(7) |
| C32–C37  | 1.366(8)  | C33–H33  | 0.950    |
| C33–C34  | 1.373(8)  | C34–H34  | 0.950    |
| C34–C35  | 1.390(9)  | C35–H35  | 0.950    |
| C35–C36  | 1.376(9)  | C36–H36  | 0.950    |
| C36–C37  | 1.411(8)  | C37–H37  | 0.950    |
| C38–H38A | 0.990     | C38–H38B | 0.990    |
| C38–C39  | 1.534(7)  | C39–H39A | 0.990    |
| C39–H39B | 0.990     | C40–H40A | 0.990    |
| C40–H40B | 0.990     | C40–C41  | 1.534(7) |
| C41–H41A | 0.990     | C41–H41B | 0.990    |
| C42–C43  | 1.387(8)  | C42–C47  | 1.396(8) |
| C43–H43  | 0.950     | C43–C44  | 1.389(8) |
| C44–H44  | 0.950     | C44–C45  | 1.374(9) |
| C45–H45  | 0.950     | C45–C46  | 1.375(9) |
| C46–H46  | 0.950     | C46–C47  | 1.386(8) |
| C47–H47  | 0.950     | C48–C49  | 1.385(8) |
| C48–C53  | 1.400(8)  | C49–H49  | 0.950    |
| C49–C50  | 1.380(8)  | C50–H50  | 0.950    |
| C50–C51  | 1.377(9)  | C51–H51  | 0.950    |
| C51–C52  | 1.365(10) | C52–H52  | 0.950    |
| C52–C53  | 1.384(9)  | C53–H53  | 0.950    |



|               |            |               |            |
|---------------|------------|---------------|------------|
| C54-O1        | 1.161(6)   | C55-O2        | 1.144(7)   |
| P1-Re-P2      | 80.37(5)   | P1-Re-P3      | 161.81(5)  |
| P1-Re-C54     | 91.02(17)  | P1-Re-C55     | 97.51(16)  |
| P1-Re-Cl      | 92.61(5)   | P2-Re-P3      | 81.45(5)   |
| P2-Re-C54     | 85.10(17)  | P2-Re-C55     | 174.63(17) |
| P2-Re-Cl      | 99.16(5)   | P3-Re-C54     | 86.66(17)  |
| P3-Re-C55     | 100.53(16) | P3-Re-Cl      | 91.03(5)   |
| C54-Re-C55    | 90.0(2)    | C54-Re-Cl     | 174.82(16) |
| C55-Re-Cl     | 85.84(17)  | N1-B-N2       | 105.1(5)   |
| N1-B-C18      | 107.6(5)   | N1-B-C19      | 108.0(5)   |
| N2-B-C18      | 109.5(5)   | N2-B-C19      | 108.8(5)   |
| C18-B-C19     | 117.3(6)   | B-N1-C1       | 126.5(6)   |
| B-N1-C4       | 125.7(5)   | C1-N1-C4      | 107.7(5)   |
| B-N2-C6       | 125.0(5)   | B-N2-C9       | 127.4(5)   |
| C6-N2-C9      | 107.5(5)   | N1-C1-C2      | 109.8(6)   |
| N1-C1-C10     | 125.4(6)   | C2-C1-C10     | 124.8(6)   |
| C1-C2-C3      | 108.1(6)   | C1-C2-C11     | 125.2(7)   |
| C3-C2-C11     | 126.8(7)   | C2-C3-C4      | 105.8(6)   |
| C2-C3-C13     | 126.0(6)   | C4-C3-C13     | 128.2(6)   |
| N1-C4-C3      | 108.7(5)   | N1-C4-C5      | 120.9(5)   |
| C3-C4-C5      | 130.3(6)   | C4-C5-C6      | 121.2(6)   |
| C4-C5-C20     | 120.1(5)   | C6-C5-C20     | 118.6(5)   |
| N2-C6-C5      | 122.0(5)   | N2-C6-C7      | 108.0(5)   |
| C5-C6-C7      | 129.9(5)   | C6-C7-C8      | 106.4(5)   |
| C6-C7-C14     | 129.8(5)   | C8-C7-C14     | 123.8(5)   |
| C7-C8-C9      | 108.3(5)   | C7-C8-C15     | 126.7(6)   |
| C9-C8-C15     | 124.9(6)   | N2-C9-C8      | 109.7(6)   |
| N2-C9-C17     | 124.2(6)   | C8-C9-C17     | 126.1(6)   |
| C1-C10-H10A   | 109.5      | C1-C10-H10B   | 109.5      |
| C1-C10-H10C   | 109.5      | H10A-C10-H10B | 109.5      |
| H10A-C10-H10C | 109.5      | H10B-C10-H10C | 109.5      |
| C2-C11-H11A   | 108.8      | C2-C11-H11B   | 108.8      |
| C2-C11-C12    | 113.8(5)   | H11A-C11-H11B | 107.7      |

|               |          |               |          |
|---------------|----------|---------------|----------|
| H11A-C11-C12  | 108.8    | H11B-C11-C12  | 108.8    |
| C11-C12-H12A  | 109.5    | C11-C12-H12B  | 109.5    |
| C11-C12-H12C  | 109.5    | H12A-C12-H12B | 109.5    |
| H12A-C12-H12C | 109.5    | H12B-C12-H12C | 109.5    |
| C3-C13-H13A   | 109.5    | C3-C13-H13B   | 109.5    |
| C3-C13-H13C   | 109.5    | H13A-C13-H13B | 109.5    |
| H13A-C13-H13C | 109.5    | H13B-C13-H13C | 109.5    |
| C7-C14-H14A   | 109.5    | C7-C14-H14B   | 109.5    |
| C7-C14-H14C   | 109.5    | H14A-C14-H14B | 109.5    |
| H14A-C14-H14C | 109.5    | H14B-C14-H14C | 109.5    |
| C8-C15-H15A   | 108.8    | C8-C15-H15B   | 108.8    |
| C8-C15-C16    | 114.0(5) | H15A-C15-H15B | 107.7    |
| H15A-C15-C16  | 108.8    | H15B-C15-C16  | 108.8    |
| C15-C16-H16A  | 109.5    | C15-C16-H16B  | 109.5    |
| C15-C16-H16C  | 109.5    | H16A-C16-H16B | 109.5    |
| H16A-C16-H16C | 109.5    | H16B-C16-H16C | 109.5    |
| C9-C17-H17A   | 109.5    | C9-C17-H17B   | 109.5    |
| C9-C17-H17C   | 109.5    | H17A-C17-H17B | 109.5    |
| H17A-C17-H17C | 109.5    | H17B-C17-H17C | 109.5    |
| B-C18-H18A    | 109.5    | B-C18-H18B    | 109.5    |
| B-C18-H18C    | 109.5    | H18A-C18-H18B | 109.5    |
| H18A-C18-H18C | 109.5    | H18B-C18-H18C | 109.5    |
| B-C19-H19A    | 109.5    | B-C19-H19B    | 109.5    |
| B-C19-H19C    | 109.5    | H19A-C19-H19B | 109.5    |
| H19A-C19-H19C | 109.5    | H19B-C19-H19C | 109.5    |
| C5-C20-C21    | 120.6(5) | C5-C20-C25    | 121.0(5) |
| C21-C20-C25   | 118.4(6) | C20-C21-H21   | 119.3    |
| C20-C21-C22   | 121.5(5) | H21-C21-C22   | 119.3    |
| C21-C22-H22   | 119.8    | C21-C22-C23   | 120.4(5) |
| H22-C22-C23   | 119.8    | C22-C23-C24   | 117.9(6) |
| C22-C23-P2    | 120.2(4) | C24-C23-P2    | 121.8(4) |
| C23-C24-H24   | 119.4    | C23-C24-C25   | 121.2(5) |
| H24-C24-C25   | 119.4    | C20-C25-C24   | 120.4(5) |
| C20-C25-H25   | 119.8    | C24-C25-H25   | 119.8    |

|              |            |               |            |
|--------------|------------|---------------|------------|
| Re-P1-C26    | 118.48(17) | Re-P1-C32     | 120.84(19) |
| Re-P1-C38    | 108.54(17) | C26-P1-C32    | 99.8(2)    |
| C26-P1-C38   | 104.3(3)   | C32-P1-C38    | 102.7(3)   |
| Re-P2-C23    | 125.10(17) | Re-P2-C39     | 106.04(18) |
| Re-P2-C40    | 105.91(18) | C23-P2-C39    | 102.0(3)   |
| C23-P2-C40   | 105.6(3)   | C39-P2-C40    | 112.2(2)   |
| Re-P3-C41    | 107.78(17) | Re-P3-C42     | 121.55(18) |
| Re-P3-C48    | 117.49(19) | C41-P3-C42    | 101.0(3)   |
| C41-P3-C48   | 103.9(3)   | C42-P3-C48    | 102.7(3)   |
| P1-C26-C27   | 124.7(4)   | P1-C26-C31    | 116.8(4)   |
| C27-C26-C31  | 118.5(5)   | C26-C27-H27   | 119.6      |
| C26-C27-C28  | 120.8(6)   | H27-C27-C28   | 119.6      |
| C27-C28-H28  | 119.6      | C27-C28-C29   | 120.8(6)   |
| H28-C28-C29  | 119.6      | C28-C29-H29   | 120.5      |
| C28-C29-C30  | 119.1(5)   | H29-C29-C30   | 120.5      |
| C29-C30-H30  | 119.5      | C29-C30-C31   | 121.1(6)   |
| H30-C30-C31  | 119.5      | C26-C31-C30   | 119.8(6)   |
| C26-C31-H31  | 120.1      | C30-C31-H31   | 120.1      |
| P1-C32-C33   | 119.9(5)   | P1-C32-C37    | 121.8(4)   |
| C33-C32-C37  | 118.2(5)   | C32-C33-H33   | 119.5      |
| C32-C33-C34  | 121.0(6)   | H33-C33-C34   | 119.5      |
| C33-C34-H34  | 119.7      | C33-C34-C35   | 120.6(6)   |
| H34-C34-C35  | 119.7      | C34-C35-H35   | 120.4      |
| C34-C35-C36  | 119.1(6)   | H35-C35-C36   | 120.4      |
| C35-C36-H36  | 120.2      | C35-C36-C37   | 119.6(6)   |
| H36-C36-C37  | 120.2      | C32-C37-C36   | 121.4(6)   |
| C32-C37-H37  | 119.3      | C36-C37-H37   | 119.3      |
| P1-C38-H38A  | 109.3      | P1-C38-H38B   | 109.3      |
| P1-C38-C39   | 111.5(4)   | H38A-C38-H38B | 108.0      |
| H38A-C38-C39 | 109.3      | H38B-C38-C39  | 109.3      |
| P2-C39-C38   | 105.1(3)   | P2-C39-H39A   | 110.7      |
| P2-C39-H39B  | 110.7      | C38-C39-H39A  | 110.7      |
| C38-C39-H39B | 110.7      | H39A-C39-H39B | 108.8      |
| P2-C40-H40A  | 110.4      | P2-C40-H40B   | 110.4      |

|              |          |               |          |
|--------------|----------|---------------|----------|
| P2-C40-C41   | 106.6(3) | H40A-C40-H40B | 108.6    |
| H40A-C40-C41 | 110.4    | H40B-C40-C41  | 110.4    |
| P3-C41-C40   | 111.9(4) | P3-C41-H41A   | 109.2    |
| P3-C41-H41B  | 109.2    | C40-C41-H41A  | 109.2    |
| C40-C41-H41B | 109.2    | H41A-C41-H41B | 107.9    |
| P3-C42-C43   | 120.2(4) | P3-C42-C47    | 121.9(5) |
| C43-C42-C47  | 117.8(5) | C42-C43-H43   | 119.5    |
| C42-C43-C44  | 121.0(6) | H43-C43-C44   | 119.5    |
| C43-C44-H44  | 119.9    | C43-C44-C45   | 120.1(7) |
| H44-C44-C45  | 119.9    | C44-C45-H45   | 120.0    |
| C44-C45-C46  | 120.0(6) | H45-C45-C46   | 120.0    |
| C45-C46-H46  | 120.0    | C45-C46-C47   | 120.0(6) |
| H46-C46-C47  | 120.0    | C42-C47-C46   | 121.0(7) |
| C42-C47-H47  | 119.5    | C46-C47-H47   | 119.5    |
| P3-C48-C49   | 120.7(4) | P3-C48-C53    | 121.3(5) |
| C49-C48-C53  | 117.9(6) | C48-C49-H49   | 119.3    |
| C48-C49-C50  | 121.4(6) | H49-C49-C50   | 119.3    |
| C49-C50-H50  | 120.2    | C49-C50-C51   | 119.5(7) |
| H50-C50-C51  | 120.2    | C50-C51-H51   | 119.8    |
| C50-C51-C52  | 120.4(7) | H51-C51-C52   | 119.8    |
| C51-C52-H52  | 119.8    | C51-C52-C53   | 120.3(6) |
| H52-C52-C53  | 119.8    | C48-C53-C52   | 120.4(7) |
| C48-C53-H53  | 119.8    | C52-C53-H53   | 119.8    |
| Re-C54-O1    | 177.8(5) | Re-C55-O2     | 178.0(5) |

**Table 3b:4.** Torsion angles [°] for ljh117 (**3b**).

|              |           |               |           |
|--------------|-----------|---------------|-----------|
| N2–B–N1–C1   | 175.8(5)  | N2–B–N1–C4    | –0.9(7)   |
| C18–B–N1–C1  | 59.3(7)   | C18–B–N1–C4   | –117.5(6) |
| C19–B–N1–C1  | –68.2(7)  | C19–B–N1–C4   | 115.0(6)  |
| N1–B–N2–C6   | –0.2(7)   | N1–B–N2–C9    | –176.5(5) |
| C18–B–N2–C6  | 115.1(6)  | C18–B–N2–C9   | –61.3(7)  |
| C19–B–N2–C6  | –115.6(6) | C19–B–N2–C9   | 68.0(7)   |
| B–N1–C1–C2   | –176.6(5) | B–N1–C1–C10   | 5.2(9)    |
| C4–N1–C1–C2  | 0.6(6)    | C4–N1–C1–C10  | –177.5(6) |
| N1–C1–C2–C3  | –1.2(7)   | N1–C1–C2–C11  | 179.4(5)  |
| C10–C1–C2–C3 | 177.0(6)  | C10–C1–C2–C11 | –2.4(10)  |
| C1–C2–C3–C4  | 1.2(6)    | C1–C2–C3–C13  | –176.3(6) |
| C11–C2–C3–C4 | –179.4(5) | C11–C2–C3–C13 | 3.1(10)   |
| B–N1–C4–C3   | 177.4(5)  | B–N1–C4–C5    | –0.1(8)   |
| C1–N1–C4–C3  | 0.1(6)    | C1–N1–C4–C5   | –177.3(5) |
| C2–C3–C4–N1  | –0.9(6)   | C2–C3–C4–C5   | 176.3(6)  |
| C13–C3–C4–N1 | 176.6(5)  | C13–C3–C4–C5  | –6.2(10)  |
| N1–C4–C5–C6  | 2.4(8)    | N1–C4–C5–C20  | 179.3(5)  |
| C3–C4–C5–C6  | –174.5(5) | C3–C4–C5–C20  | 2.5(9)    |
| C4–C5–C6–N2  | –3.5(8)   | C4–C5–C6–C7   | 179.7(5)  |
| C20–C5–C6–N2 | 179.5(5)  | C20–C5–C6–C7  | 2.7(9)    |
| B–N2–C6–C5   | 2.3(8)    | B–N2–C6–C7    | 179.7(5)  |
| C9–N2–C6–C5  | 179.3(5)  | C9–N2–C6–C7   | –3.3(6)   |
| N2–C6–C7–C8  | 3.2(6)    | N2–C6–C7–C14  | –179.5(5) |
| C5–C6–C7–C8  | –179.7(5) | C5–C6–C7–C14  | –2.4(10)  |
| C6–C7–C8–C9  | –1.9(6)   | C6–C7–C8–C15  | 175.7(5)  |
| C14–C7–C8–C9 | –179.4(5) | C14–C7–C8–C15 | –1.8(9)   |
| B–N2–C9–C8   | 179.0(5)  | B–N2–C9–C17   | –0.3(9)   |
| C6–N2–C9–C8  | 2.1(6)    | C6–N2–C9–C17  | –177.2(5) |
| C7–C8–C9–N2  | –0.1(7)   | C7–C8–C9–C17  | 179.2(6)  |
| C15–C8–C9–N2 | –177.8(5) | C15–C8–C9–C17 | 1.5(10)   |

|                 |           |                 |           |
|-----------------|-----------|-----------------|-----------|
| C1-C2-C11-C12   | -82.5(9)  | C3-C2-C11-C12   | 98.2(8)   |
| C7-C8-C15-C16   | -78.2(8)  | C9-C8-C15-C16   | 99.1(8)   |
| C4-C5-C20-C21   | -98.6(7)  | C4-C5-C20-C25   | 83.5(7)   |
| C6-C5-C20-C21   | 78.4(7)   | C6-C5-C20-C25   | -99.4(6)  |
| C5-C20-C21-C22  | -172.7(6) | C25-C20-C21-C22 | 5.3(9)    |
| C20-C21-C22-C23 | -0.4(9)   | C21-C22-C23-C24 | -4.6(8)   |
| C21-C22-C23-P2  | 179.9(4)  | C22-C23-C24-C25 | 4.9(8)    |
| P2-C23-C24-C25  | -179.8(4) | C23-C24-C25-C20 | 0.0(9)    |
| C5-C20-C25-C24  | 172.9(5)  | C21-C20-C25-C24 | -5.0(9)   |
| C22-C23-P2-Re   | -19.0(5)  | C22-C23-P2-C39  | 100.6(5)  |
| C22-C23-P2-C40  | -142.0(4) | C24-C23-P2-Re   | 165.8(4)  |
| C24-C23-P2-C39  | -74.6(5)  | C24-C23-P2-C40  | 42.8(5)   |
| Re-P1-C26-C27   | 125.1(5)  | Re-P1-C26-C31   | -55.2(5)  |
| C32-P1-C26-C27  | -101.7(5) | C32-P1-C26-C31  | 78.1(5)   |
| C38-P1-C26-C27  | 4.3(6)    | C38-P1-C26-C31  | -176.0(5) |
| P1-C26-C27-C28  | 177.9(5)  | C31-C26-C27-C28 | -1.8(9)   |
| C26-C27-C28-C29 | 0.9(10)   | C27-C28-C29-C30 | 0.0(10)   |
| C28-C29-C30-C31 | 0.1(10)   | P1-C26-C31-C30  | -177.9(5) |
| C27-C26-C31-C30 | 1.8(9)    | C29-C30-C31-C26 | -1.0(10)  |
| Re-P1-C32-C33   | -167.2(3) | Re-P1-C32-C37   | 13.7(5)   |
| C26-P1-C32-C33  | 61.0(5)   | C26-P1-C32-C37  | -118.1(5) |
| C38-P1-C32-C33  | -46.3(5)  | C38-P1-C32-C37  | 134.6(5)  |
| P1-C32-C33-C34  | -179.7(4) | C37-C32-C33-C34 | -0.6(8)   |
| C32-C33-C34-C35 | 1.0(9)    | C33-C34-C35-C36 | -1.3(9)   |
| C34-C35-C36-C37 | 1.0(9)    | P1-C32-C37-C36  | 179.5(4)  |
| C33-C32-C37-C36 | 0.4(8)    | C35-C36-C37-C32 | -0.6(9)   |
| Re-P1-C38-C39   | 26.7(4)   | C26-P1-C38-C39  | 153.9(4)  |
| C32-P1-C38-C39  | -102.3(4) | P1-C38-C39-P2   | -52.8(5)  |
| Re-P2-C39-C38   | 56.0(4)   | C23-P2-C39-C38  | -76.3(4)  |
| C40-P2-C39-C38  | 171.1(4)  | Re-P2-C40-C41   | -53.5(4)  |
| C23-P2-C40-C41  | 81.0(4)   | C39-P2-C40-C41  | -168.7(4) |
| P2-C40-C41-P3   | 52.4(5)   | Re-P3-C41-C40   | -27.6(4)  |

|                 |           |                 |           |
|-----------------|-----------|-----------------|-----------|
| C42-P3-C41-C40  | -156.0(4) | C48-P3-C41-C40  | 97.8(4)   |
| Re-P3-C42-C43   | -65.1(5)  | Re-P3-C42-C47   | 111.4(4)  |
| C41-P3-C42-C43  | 53.9(5)   | C41-P3-C42-C47  | -129.7(5) |
| C48-P3-C42-C43  | 161.0(5)  | C48-P3-C42-C47  | -22.5(5)  |
| P3-C42-C43-C44  | 179.2(4)  | C47-C42-C43-C44 | 2.6(8)    |
| C42-C43-C44-C45 | -1.0(9)   | C43-C44-C45-C46 | -1.6(9)   |
| C44-C45-C46-C47 | 2.5(9)    | C45-C46-C47-C42 | -0.8(9)   |
| P3-C42-C47-C46  | -178.3(4) | C43-C42-C47-C46 | -1.7(8)   |
| Re-P3-C48-C49   | -26.4(5)  | Re-P3-C48-C53   | 156.5(4)  |
| C41-P3-C48-C49  | -145.3(5) | C41-P3-C48-C53  | 37.5(5)   |
| C42-P3-C48-C49  | 109.8(5)  | C42-P3-C48-C53  | -67.3(5)  |
| P3-C48-C49-C50  | -178.6(4) | C53-C48-C49-C50 | -1.4(9)   |
| C48-C49-C50-C51 | -0.7(9)   | C49-C50-C51-C52 | 1.4(10)   |
| C50-C51-C52-C53 | -0.1(10)  | C51-C52-C53-C48 | -2.0(9)   |
| P3-C48-C53-C52  | 179.9(4)  | C49-C48-C53-C52 | 2.7(8)    |

**Table 3b:5.** Anisotropic displacement parameters ( $\text{\AA}^2$ ) for ljh117 (**3b**). The anisotropic displacement factor exponent takes the form:  $-2\pi^2[h^2a^{*2}U^{11} + \dots + 2hka^*b^*U^{12}]$

|     | U <sup>11</sup> | U <sup>22</sup> | U <sup>33</sup> | U <sup>23</sup> | U <sup>13</sup> | U <sup>12</sup> |
|-----|-----------------|-----------------|-----------------|-----------------|-----------------|-----------------|
| Re  | 0.02648(14)     | 0.02370(15)     | 0.01895(13)     | -0.00037(11)    | 0.00415(9)      | 0.00130(12)     |
| B   | 0.041(4)        | 0.030(4)        | 0.038(4)        | -0.004(3)       | 0.010(3)        | -0.008(4)       |
| N1  | 0.043(3)        | 0.032(3)        | 0.034(3)        | -0.008(2)       | 0.011(2)        | -0.006(3)       |
| N2  | 0.042(3)        | 0.026(3)        | 0.036(3)        | -0.003(2)       | 0.012(2)        | 0.001(2)        |
| C1  | 0.045(4)        | 0.043(4)        | 0.040(3)        | -0.014(3)       | 0.014(3)        | -0.006(3)       |
| C2  | 0.042(4)        | 0.059(5)        | 0.030(3)        | -0.012(3)       | 0.013(3)        | -0.008(4)       |
| C3  | 0.044(4)        | 0.046(4)        | 0.029(3)        | -0.004(3)       | 0.010(3)        | 0.003(3)        |
| C4  | 0.037(3)        | 0.034(4)        | 0.027(3)        | -0.006(3)       | 0.007(3)        | -0.003(3)       |
| C5  | 0.048(4)        | 0.030(4)        | 0.024(3)        | -0.006(3)       | 0.013(3)        | -0.003(3)       |
| C6  | 0.032(3)        | 0.015(3)        | 0.026(3)        | 0.003(2)        | 0.001(2)        | -0.005(3)       |
| C7  | 0.041(3)        | 0.029(4)        | 0.031(3)        | 0.000(3)        | 0.012(3)        | 0.000(3)        |
| C8  | 0.042(4)        | 0.035(4)        | 0.036(3)        | 0.001(3)        | 0.012(3)        | 0.000(3)        |
| C9  | 0.044(4)        | 0.035(4)        | 0.034(3)        | 0.001(3)        | 0.013(3)        | 0.002(3)        |
| C10 | 0.050(4)        | 0.060(5)        | 0.056(4)        | -0.021(4)       | 0.015(3)        | -0.018(4)       |
| C11 | 0.041(4)        | 0.077(6)        | 0.037(3)        | -0.010(4)       | 0.008(3)        | -0.012(4)       |
| C12 | 0.050(4)        | 0.103(7)        | 0.048(4)        | -0.029(4)       | 0.014(3)        | 0.000(5)        |
| C13 | 0.041(4)        | 0.065(5)        | 0.035(3)        | -0.001(3)       | 0.003(3)        | 0.007(4)        |
| C14 | 0.038(3)        | 0.042(4)        | 0.041(3)        | 0.002(3)        | -0.003(3)       | -0.015(3)       |
| C15 | 0.034(3)        | 0.052(5)        | 0.041(3)        | 0.003(3)        | 0.004(3)        | 0.001(3)        |
| C16 | 0.043(4)        | 0.067(5)        | 0.042(4)        | -0.002(4)       | 0.002(3)        | -0.005(4)       |
| C17 | 0.059(4)        | 0.041(5)        | 0.058(4)        | 0.013(4)        | 0.011(4)        | 0.008(4)        |
| C18 | 0.059(4)        | 0.038(4)        | 0.054(4)        | 0.003(3)        | 0.022(3)        | -0.006(4)       |
| C19 | 0.048(4)        | 0.039(4)        | 0.053(4)        | -0.006(3)       | 0.020(3)        | -0.005(3)       |
| C20 | 0.034(3)        | 0.030(4)        | 0.027(3)        | 0.001(3)        | 0.003(2)        | 0.004(3)        |
| C21 | 0.047(4)        | 0.031(4)        | 0.032(3)        | 0.001(3)        | 0.016(3)        | -0.002(3)       |
| C22 | 0.047(3)        | 0.032(4)        | 0.026(3)        | -0.008(3)       | 0.015(3)        | -0.002(3)       |
| C23 | 0.030(3)        | 0.032(4)        | 0.020(3)        | 0.003(2)        | 0.004(2)        | 0.004(3)        |



|     |           |           |           |            |           |           |
|-----|-----------|-----------|-----------|------------|-----------|-----------|
| C24 | 0.041(3)  | 0.038(4)  | 0.023(3)  | 0.000(3)   | 0.010(2)  | 0.009(3)  |
| C25 | 0.051(4)  | 0.023(3)  | 0.028(3)  | -0.004(3)  | 0.013(3)  | 0.007(3)  |
| P1  | 0.0282(7) | 0.0224(8) | 0.0214(7) | -0.0027(6) | 0.0026(5) | 0.0008(6) |
| P2  | 0.0299(7) | 0.0236(8) | 0.0189(7) | -0.0005(6) | 0.0048(5) | 0.0032(6) |
| P3  | 0.0271(7) | 0.0295(9) | 0.0240(7) | 0.0004(6)  | 0.0040(6) | 0.0039(6) |
| C26 | 0.027(3)  | 0.029(3)  | 0.027(3)  | 0.005(3)   | 0.005(2)  | 0.000(3)  |
| C27 | 0.041(3)  | 0.046(4)  | 0.035(3)  | -0.006(3)  | 0.008(3)  | -0.005(3) |
| C28 | 0.044(4)  | 0.039(4)  | 0.046(4)  | 0.000(3)   | 0.019(3)  | -0.014(3) |
| C29 | 0.041(4)  | 0.046(4)  | 0.039(3)  | 0.018(3)   | 0.017(3)  | 0.006(3)  |
| C30 | 0.050(4)  | 0.045(4)  | 0.035(3)  | -0.004(3)  | 0.019(3)  | -0.004(3) |
| C31 | 0.043(4)  | 0.039(4)  | 0.039(3)  | -0.008(3)  | 0.015(3)  | -0.010(3) |
| C32 | 0.027(3)  | 0.031(4)  | 0.023(3)  | 0.009(2)   | 0.009(2)  | 0.010(3)  |
| C33 | 0.034(3)  | 0.034(4)  | 0.042(3)  | 0.001(3)   | 0.010(3)  | 0.006(3)  |
| C34 | 0.041(4)  | 0.056(5)  | 0.033(3)  | 0.004(3)   | 0.005(3)  | 0.017(4)  |
| C35 | 0.047(4)  | 0.051(5)  | 0.043(4)  | 0.015(3)   | 0.016(3)  | 0.021(4)  |
| C36 | 0.053(4)  | 0.027(4)  | 0.064(4)  | 0.006(3)   | 0.029(4)  | 0.006(3)  |
| C37 | 0.037(3)  | 0.033(4)  | 0.041(3)  | 0.001(3)   | 0.015(3)  | 0.004(3)  |
| C38 | 0.031(3)  | 0.037(4)  | 0.023(3)  | 0.001(3)   | 0.001(2)  | 0.001(3)  |
| C39 | 0.031(3)  | 0.032(4)  | 0.018(3)  | -0.001(2)  | 0.002(2)  | 0.003(3)  |
| C40 | 0.035(3)  | 0.028(3)  | 0.019(3)  | 0.001(2)   | 0.004(2)  | 0.000(3)  |
| C41 | 0.030(3)  | 0.037(4)  | 0.027(3)  | -0.001(3)  | 0.003(2)  | 0.005(3)  |
| C42 | 0.030(3)  | 0.034(4)  | 0.027(3)  | 0.002(3)   | 0.008(2)  | 0.009(3)  |
| C43 | 0.038(3)  | 0.030(4)  | 0.038(3)  | -0.002(3)  | 0.006(3)  | 0.007(3)  |
| C44 | 0.055(4)  | 0.038(4)  | 0.042(4)  | 0.007(3)   | 0.012(3)  | 0.014(3)  |
| C45 | 0.046(4)  | 0.053(5)  | 0.031(3)  | 0.013(3)   | 0.010(3)  | 0.027(4)  |
| C46 | 0.044(4)  | 0.062(5)  | 0.024(3)  | -0.003(3)  | -0.001(3) | 0.008(4)  |
| C47 | 0.039(3)  | 0.044(4)  | 0.028(3)  | 0.000(3)   | 0.006(3)  | 0.011(3)  |
| C48 | 0.030(3)  | 0.041(4)  | 0.023(3)  | 0.004(3)   | 0.004(2)  | 0.000(3)  |
| C49 | 0.034(3)  | 0.032(4)  | 0.044(4)  | -0.002(3)  | 0.009(3)  | -0.005(3) |
| C50 | 0.044(4)  | 0.040(4)  | 0.048(4)  | 0.003(3)   | 0.003(3)  | 0.002(3)  |
| C51 | 0.045(4)  | 0.048(5)  | 0.048(4)  | 0.001(3)   | 0.005(3)  | -0.014(4) |
| C52 | 0.036(4)  | 0.065(5)  | 0.051(4)  | 0.000(4)   | 0.019(3)  | -0.013(4) |
| C53 | 0.032(3)  | 0.050(5)  | 0.038(3)  | 0.001(3)   | 0.007(3)  | 0.000(3)  |

|     |           |           |           |           |           |           |
|-----|-----------|-----------|-----------|-----------|-----------|-----------|
| C54 | 0.031(3)  | 0.020(3)  | 0.031(3)  | -0.006(3) | 0.005(2)  | -0.005(3) |
| O1  | 0.039(2)  | 0.044(3)  | 0.044(2)  | 0.012(2)  | 0.010(2)  | 0.005(2)  |
| C55 | 0.033(3)  | 0.031(4)  | 0.028(3)  | 0.002(3)  | 0.006(2)  | 0.006(3)  |
| O2  | 0.057(3)  | 0.041(3)  | 0.037(2)  | -0.012(2) | 0.015(2)  | -0.004(2) |
| Cl  | 0.0423(8) | 0.0332(8) | 0.0222(6) | 0.0022(6) | 0.0079(6) | 0.0011(7) |

**Table 3b:6.** Hydrogen coordinates and isotropic displacement parameters ( $\text{\AA}^2$ ) for ljh117 (3b).

|      | x       | y      | z      | U     |
|------|---------|--------|--------|-------|
| H10A | 0.4785  | 0.6323 | 0.5962 | 0.083 |
| H10B | 0.5935  | 0.6143 | 0.6614 | 0.083 |
| H10C | 0.4960  | 0.6302 | 0.7017 | 0.083 |
| H11A | 0.6579  | 0.4928 | 0.7965 | 0.063 |
| H11B | 0.6539  | 0.5539 | 0.7889 | 0.063 |
| H12A | 0.8087  | 0.5264 | 0.7526 | 0.100 |
| H12B | 0.7250  | 0.5472 | 0.6624 | 0.100 |
| H12C | 0.7388  | 0.4869 | 0.6804 | 0.100 |
| H13A | 0.5761  | 0.4224 | 0.7426 | 0.073 |
| H13B | 0.4849  | 0.3979 | 0.6603 | 0.073 |
| H13C | 0.4536  | 0.4155 | 0.7481 | 0.073 |
| H14A | -0.0223 | 0.4096 | 0.3994 | 0.065 |
| H14B | 0.0679  | 0.3962 | 0.4910 | 0.065 |
| H14C | 0.0962  | 0.3902 | 0.3981 | 0.065 |
| H15A | -0.0992 | 0.5341 | 0.3000 | 0.053 |
| H15B | -0.1163 | 0.4773 | 0.3319 | 0.053 |
| H16A | -0.1233 | 0.4778 | 0.1801 | 0.079 |
| H16B | -0.0221 | 0.4439 | 0.2352 | 0.079 |
| H16C | -0.0020 | 0.5007 | 0.2044 | 0.079 |
| H17A | 0.1254  | 0.6261 | 0.4008 | 0.081 |
| H17B | -0.0011 | 0.6103 | 0.3722 | 0.081 |
| H17C | 0.0718  | 0.5997 | 0.3059 | 0.081 |
| H18A | 0.3850  | 0.5748 | 0.4313 | 0.074 |
| H18B | 0.3905  | 0.6302 | 0.4762 | 0.074 |
| H18C | 0.2849  | 0.6138 | 0.3978 | 0.074 |
| H19A | 0.2077  | 0.6002 | 0.6218 | 0.069 |
| H19B | 0.1819  | 0.6395 | 0.5398 | 0.069 |
| H19C | 0.2978  | 0.6412 | 0.6141 | 0.069 |

|      |         |         |        |       |
|------|---------|---------|--------|-------|
| H21  | 0.3307  | 0.3858  | 0.4698 | 0.043 |
| H22  | 0.3036  | 0.2988  | 0.4811 | 0.040 |
| H24  | 0.1998  | 0.3245  | 0.6993 | 0.040 |
| H25  | 0.2264  | 0.4119  | 0.6866 | 0.040 |
| H27  | 0.5733  | 0.2566  | 0.5644 | 0.049 |
| H28  | 0.6811  | 0.2844  | 0.4764 | 0.050 |
| H29  | 0.6633  | 0.2479  | 0.3372 | 0.049 |
| H30  | 0.5371  | 0.1827  | 0.2868 | 0.050 |
| H31  | 0.4272  | 0.1540  | 0.3739 | 0.048 |
| H33  | 0.6225  | 0.1514  | 0.6546 | 0.045 |
| H34  | 0.7213  | 0.0780  | 0.7074 | 0.054 |
| H35  | 0.6438  | -0.0030 | 0.6680 | 0.056 |
| H36  | 0.4628  | -0.0091 | 0.5797 | 0.054 |
| H37  | 0.3629  | 0.0659  | 0.5272 | 0.043 |
| H38A | 0.5015  | 0.2020  | 0.6918 | 0.038 |
| H38B | 0.4513  | 0.2507  | 0.6319 | 0.038 |
| H39A | 0.3527  | 0.2412  | 0.7375 | 0.034 |
| H39B | 0.3289  | 0.1818  | 0.7117 | 0.034 |
| H40A | 0.0898  | 0.1939  | 0.6543 | 0.034 |
| H40B | 0.0882  | 0.2547  | 0.6701 | 0.034 |
| H41A | -0.0013 | 0.2693  | 0.5186 | 0.039 |
| H41B | -0.0700 | 0.2263  | 0.5522 | 0.039 |
| H43  | 0.0177  | 0.2909  | 0.3809 | 0.043 |
| H44  | -0.0806 | 0.3344  | 0.2529 | 0.054 |
| H45  | -0.2173 | 0.2926  | 0.1451 | 0.052 |
| H46  | -0.2506 | 0.2061  | 0.1615 | 0.055 |
| H47  | -0.1561 | 0.1629  | 0.2908 | 0.046 |
| H49  | 0.0261  | 0.0799  | 0.4274 | 0.045 |
| H50  | -0.0868 | 0.0106  | 0.4307 | 0.055 |
| H51  | -0.2504 | 0.0233  | 0.4657 | 0.059 |
| H52  | -0.3041 | 0.1049  | 0.4920 | 0.059 |
| H53  | -0.1950 | 0.1753  | 0.4835 | 0.049 |

### 5.3 Crystallographic data for *cis, fac*-[ReCl(CO)<sub>2</sub>(2)](3c)

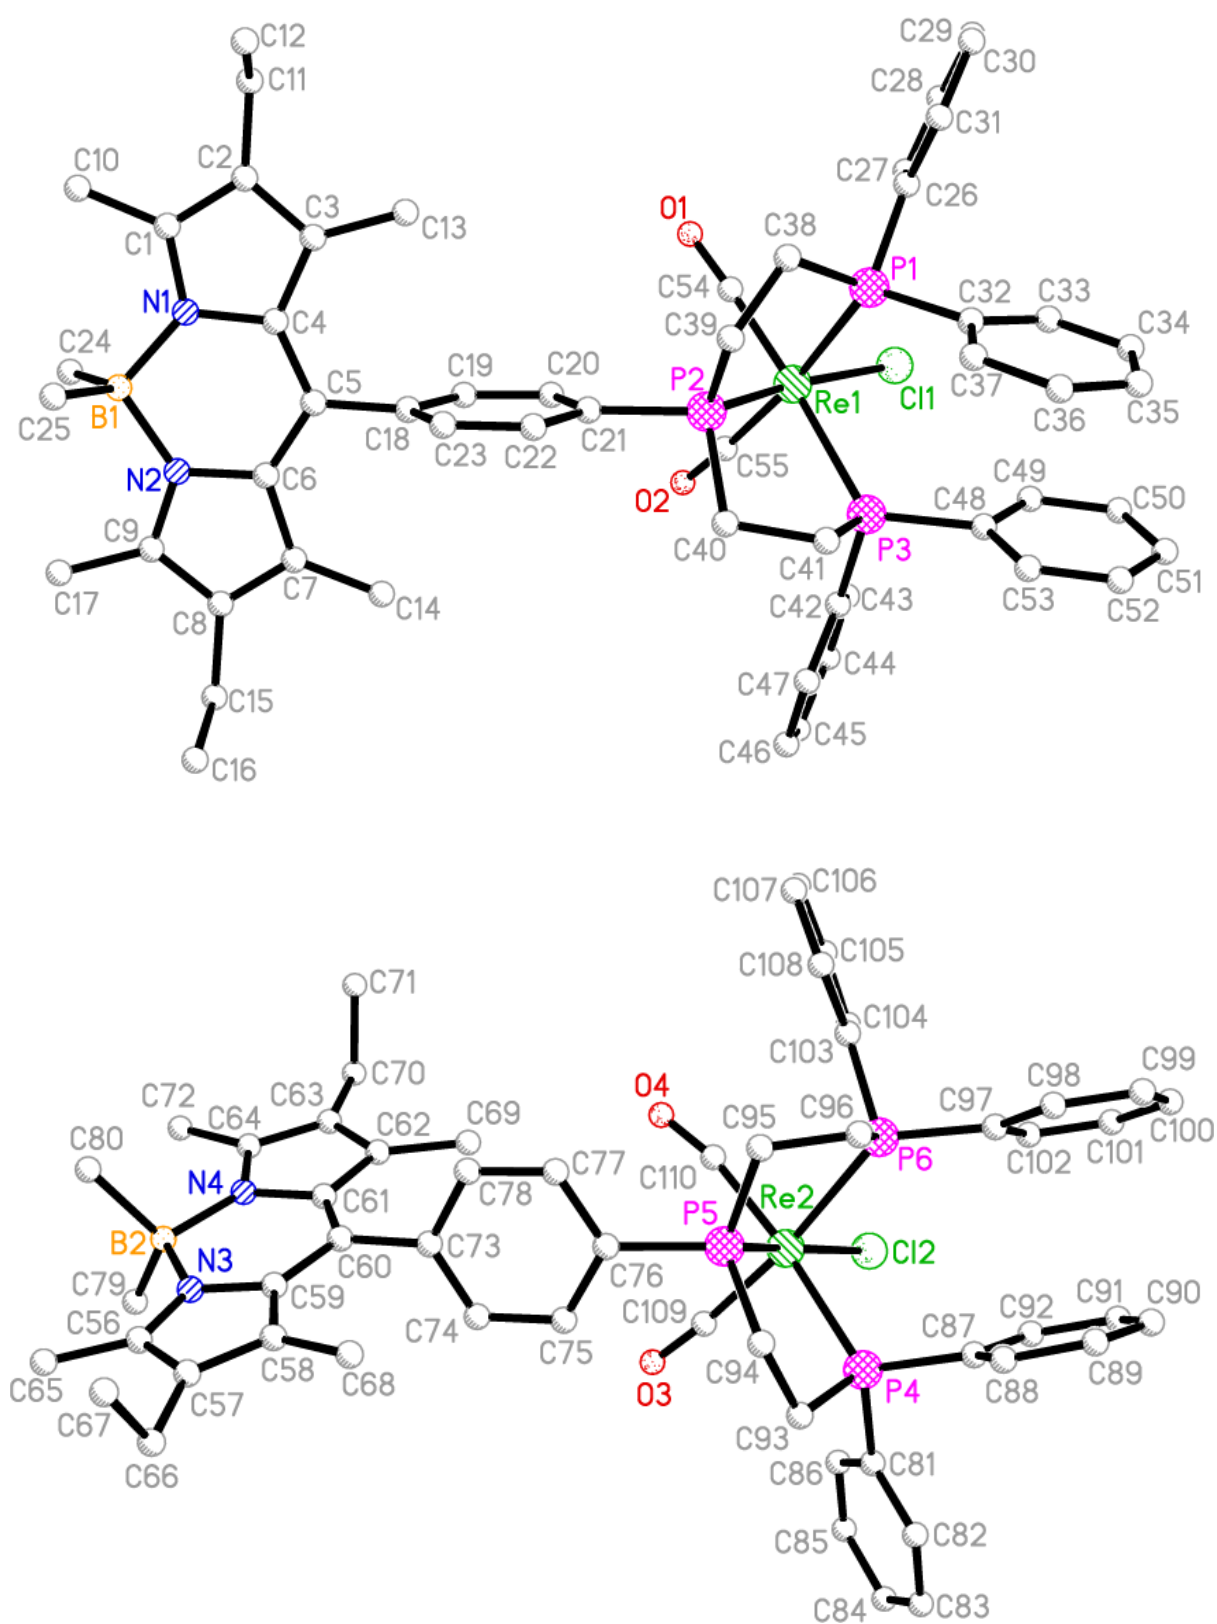

**Table 3c:1.** Crystal data and structure refinement for ljh102 (**3c**).

|                                       |                                                                                                                     |                       |
|---------------------------------------|---------------------------------------------------------------------------------------------------------------------|-----------------------|
| Identification code                   | ljh102 ( <b>3c</b> )                                                                                                |                       |
| Chemical formula (moiety)             | C <sub>55</sub> H <sub>60</sub> BClN <sub>2</sub> O <sub>2</sub> P <sub>3</sub> Re·2C <sub>4</sub> H <sub>8</sub> O |                       |
| Chemical formula (total)              | C <sub>63</sub> H <sub>76</sub> BClN <sub>2</sub> O <sub>4</sub> P <sub>3</sub> Re                                  |                       |
| Formula weight                        | 1250.62                                                                                                             |                       |
| Temperature                           | 150(2) K                                                                                                            |                       |
| Radiation, wavelength                 | CuK $\alpha$ , 1.54178 Å                                                                                            |                       |
| Crystal system, space group           | triclinic, P $\bar{1}$                                                                                              |                       |
| Unit cell parameters                  | a = 12.0578(8) Å                                                                                                    | $\alpha$ = 84.193(5)° |
|                                       | b = 15.8145(12) Å                                                                                                   | $\beta$ = 89.183(5)°  |
|                                       | c = 32.8027(16) Å                                                                                                   | $\gamma$ = 89.699(6)° |
| Cell volume                           | 6222.3(7) Å <sup>3</sup>                                                                                            |                       |
| Z                                     | 4                                                                                                                   |                       |
| Calculated density                    | 1.335 g/cm <sup>3</sup>                                                                                             |                       |
| Absorption coefficient $\mu$          | 5.297 mm <sup>-1</sup>                                                                                              |                       |
| F(000)                                | 2568                                                                                                                |                       |
| Crystal colour and size               | red, 0.20 × 0.02 × 0.02 mm <sup>3</sup>                                                                             |                       |
| Reflections for cell refinement       | 9471 ( $\theta$ range 2.7 to 62.3°)                                                                                 |                       |
| Data collection method                | Agilent Technologies Gemini A Ultra<br>$\omega$ scans                                                               |                       |
| $\theta$ range for data collection    | 2.7 to 62.4°                                                                                                        |                       |
| Index ranges                          | h -13 to 13, k -18 to 14, l -37 to 35                                                                               |                       |
| Completeness to $\theta = 67.7^\circ$ | 82.2 %                                                                                                              |                       |
| Reflections collected                 | 40658                                                                                                               |                       |
| Independent reflections               | 18503 ( $R_{\text{int}} = 0.0673$ )                                                                                 |                       |
| Reflections with $F^2 > 2\sigma$      | 13764                                                                                                               |                       |
| Absorption correction                 | multi-scan                                                                                                          |                       |
| Min. and max. transmission            | 0.420 and 0.900                                                                                                     |                       |
| Structure solution                    | direct methods                                                                                                      |                       |
| Refinement method                     | Full-matrix least-squares on $F^2$                                                                                  |                       |
| Weighting parameters a, b             | 0.0914, 37.8105                                                                                                     |                       |
| Data / restraints / parameters        | 18503 / 2512 / 1351                                                                                                 |                       |

|                                     |                                             |
|-------------------------------------|---------------------------------------------|
| Final R indices [ $F^2 > 2\sigma$ ] | R1 = 0.0664, wR2 = 0.1725                   |
| R indices (all data)                | R1 = 0.0910, wR2 = 0.1927                   |
| Goodness-of-fit on $F^2$            | 1.053                                       |
| Largest and mean shift/su           | 0.001 and 0.000                             |
| Largest diff. peak and hole         | 3.22 and $-2.00 \text{ e } \text{\AA}^{-3}$ |

**Table 3c:2.** Atomic coordinates and equivalent isotropic displacement parameters ( $\text{\AA}^2$ ) for ljh102 (3c).  $U_{\text{eq}}$  is defined as one third of the trace of the orthogonalised  $U^{ij}$  tensor.

|     | x          | y          | z          | $U_{\text{eq}}$ |
|-----|------------|------------|------------|-----------------|
| Re1 | 0.18741(3) | 0.95307(2) | 0.64733(2) | 0.02319(13)     |
| B1  | 0.6244(13) | 0.8872(12) | 0.9291(4)  | 0.066(3)        |
| N1  | 0.4963(8)  | 0.8856(6)  | 0.9199(3)  | 0.049(2)        |
| N2  | 0.6837(8)  | 0.9048(6)  | 0.8853(3)  | 0.050(2)        |
| C1  | 0.4122(10) | 0.8685(9)  | 0.9473(4)  | 0.057(3)        |
| C2  | 0.3073(10) | 0.8825(9)  | 0.9279(4)  | 0.057(3)        |
| C3  | 0.3278(9)  | 0.9094(7)  | 0.8868(3)  | 0.045(2)        |
| C4  | 0.4466(9)  | 0.9111(7)  | 0.8820(3)  | 0.044(2)        |
| C5  | 0.5135(9)  | 0.9296(7)  | 0.8470(3)  | 0.042(2)        |
| C6  | 0.6294(9)  | 0.9242(7)  | 0.8483(3)  | 0.044(2)        |
| C7  | 0.7093(10) | 0.9374(8)  | 0.8160(3)  | 0.050(3)        |
| C8  | 0.8111(10) | 0.9250(9)  | 0.8349(4)  | 0.060(3)        |
| C9  | 0.7916(10) | 0.9071(8)  | 0.8769(4)  | 0.054(3)        |
| C10 | 0.4290(13) | 0.8416(11) | 0.9919(4)  | 0.079(4)        |
| C11 | 0.1967(11) | 0.8714(10) | 0.9484(4)  | 0.068(3)        |
| C12 | 0.1462(11) | 0.9533(11) | 0.9613(4)  | 0.076(4)        |
| C13 | 0.2390(10) | 0.9310(9)  | 0.8564(4)  | 0.057(3)        |
| C14 | 0.6923(10) | 0.9559(8)  | 0.7712(3)  | 0.053(3)        |
| C15 | 0.9256(11) | 0.9343(10) | 0.8142(4)  | 0.073(4)        |
| C16 | 0.9735(12) | 1.0218(11) | 0.8136(4)  | 0.081(4)        |
| C17 | 0.8797(11) | 0.8929(11) | 0.9089(4)  | 0.073(4)        |
| C18 | 0.4571(9)  | 0.9575(7)  | 0.8080(3)  | 0.040(2)        |
| C19 | 0.4197(9)  | 0.8988(7)  | 0.7827(3)  | 0.042(2)        |
| C20 | 0.3594(8)  | 0.9241(6)  | 0.7475(3)  | 0.035(2)        |
| C21 | 0.3365(8)  | 1.0089(6)  | 0.7371(3)  | 0.0297(18)      |
| C22 | 0.3759(9)  | 1.0681(6)  | 0.7623(3)  | 0.038(2)        |
| C23 | 0.4326(9)  | 1.0428(7)  | 0.7973(3)  | 0.043(2)        |
| C24 | 0.6630(13) | 0.7964(11) | 0.9505(5)  | 0.093(5)        |
| C25 | 0.6479(14) | 0.9638(12) | 0.9554(5)  | 0.091(4)        |



|     |             |             |            |            |
|-----|-------------|-------------|------------|------------|
| P1  | 0.01922(19) | 1.03949(14) | 0.65358(7) | 0.0270(5)  |
| P2  | 0.25908(19) | 1.04438(14) | 0.69081(7) | 0.0268(5)  |
| P3  | 0.27522(18) | 1.05689(13) | 0.59472(7) | 0.0229(5)  |
| C26 | -0.1172(8)  | 0.9896(6)   | 0.6580(3)  | 0.0291(18) |
| C27 | -0.1300(9)  | 0.9056(7)   | 0.6496(4)  | 0.047(3)   |
| C28 | -0.2369(10) | 0.8708(8)   | 0.6501(4)  | 0.059(3)   |
| C29 | -0.3278(10) | 0.9169(8)   | 0.6597(4)  | 0.055(3)   |
| C30 | -0.3147(9)  | 0.9988(8)   | 0.6699(3)  | 0.047(2)   |
| C31 | -0.2110(8)  | 1.0344(7)   | 0.6686(3)  | 0.039(2)   |
| C32 | -0.0143(7)  | 1.1293(5)   | 0.6158(3)  | 0.0271(17) |
| C33 | -0.0645(8)  | 1.1111(6)   | 0.5798(3)  | 0.033(2)   |
| C34 | -0.0875(8)  | 1.1753(6)   | 0.5492(3)  | 0.038(2)   |
| C35 | -0.0585(9)  | 1.2573(7)   | 0.5537(3)  | 0.043(2)   |
| C36 | -0.0069(9)  | 1.2767(7)   | 0.5888(3)  | 0.041(2)   |
| C37 | 0.0159(8)   | 1.2130(6)   | 0.6203(3)  | 0.033(2)   |
| C38 | 0.0343(8)   | 1.0865(6)   | 0.7028(3)  | 0.0312(19) |
| C39 | 0.1527(8)   | 1.1175(6)   | 0.7097(3)  | 0.0306(19) |
| C40 | 0.3592(8)   | 1.1172(6)   | 0.6637(3)  | 0.0288(19) |
| C41 | 0.3118(8)   | 1.1483(6)   | 0.6213(3)  | 0.0277(18) |
| C42 | 0.4072(7)   | 1.0190(5)   | 0.5747(3)  | 0.0265(17) |
| C43 | 0.4088(9)   | 0.9429(6)   | 0.5586(3)  | 0.035(2)   |
| C44 | 0.5060(9)   | 0.9115(7)   | 0.5430(3)  | 0.041(2)   |
| C45 | 0.6034(9)   | 0.9555(7)   | 0.5439(3)  | 0.041(2)   |
| C46 | 0.6053(9)   | 1.0336(7)   | 0.5600(3)  | 0.044(2)   |
| C47 | 0.5068(8)   | 1.0643(7)   | 0.5750(3)  | 0.039(2)   |
| C48 | 0.2079(7)   | 1.1026(5)   | 0.5477(3)  | 0.0254(17) |
| C49 | 0.1542(7)   | 1.0485(6)   | 0.5237(3)  | 0.0296(19) |
| C50 | 0.1058(8)   | 1.0821(6)   | 0.4868(3)  | 0.0318(19) |
| C51 | 0.1132(8)   | 1.1679(6)   | 0.4738(3)  | 0.0312(19) |
| C52 | 0.1658(8)   | 1.2210(6)   | 0.4983(3)  | 0.0310(19) |
| C53 | 0.2137(8)   | 1.1884(6)   | 0.5345(3)  | 0.0303(19) |
| C54 | 0.1260(7)   | 0.8801(6)   | 0.6918(3)  | 0.0273(18) |
| O1  | 0.0925(7)   | 0.8343(5)   | 0.7197(2)  | 0.053(2)   |

|     |             |             |            |             |
|-----|-------------|-------------|------------|-------------|
| C55 | 0.3196(7)   | 0.8842(5)   | 0.6495(3)  | 0.0276(18)  |
| O2  | 0.3985(6)   | 0.8407(4)   | 0.6530(2)  | 0.0405(16)  |
| Cl1 | 0.10684(18) | 0.87199(13) | 0.59292(7) | 0.0305(5)   |
| Re2 | 0.27161(3)  | 0.45218(2)  | 0.64411(2) | 0.02525(13) |
| B2  | -0.0986(16) | 0.2441(12)  | 0.9088(5)  | 0.075(3)    |
| N3  | 0.0016(10)  | 0.3062(7)   | 0.9147(3)  | 0.066(3)    |
| N4  | -0.1224(10) | 0.2513(7)   | 0.8616(3)  | 0.063(3)    |
| C56 | 0.0479(14)  | 0.3224(10)  | 0.9497(4)  | 0.075(4)    |
| C57 | 0.1302(14)  | 0.3845(10)  | 0.9424(4)  | 0.076(4)    |
| C58 | 0.1323(12)  | 0.4089(8)   | 0.9007(4)  | 0.061(3)    |
| C59 | 0.0525(11)  | 0.3589(8)   | 0.8828(4)  | 0.056(3)    |
| C60 | 0.0207(11)  | 0.3547(7)   | 0.8415(3)  | 0.052(3)    |
| C61 | -0.0613(11) | 0.3014(8)   | 0.8313(4)  | 0.057(3)    |
| C62 | -0.1024(12) | 0.2853(8)   | 0.7919(4)  | 0.063(3)    |
| C63 | -0.1888(14) | 0.2309(9)   | 0.7997(5)  | 0.076(4)    |
| C64 | -0.1991(14) | 0.2117(10)  | 0.8427(5)  | 0.076(4)    |
| C65 | 0.0191(16)  | 0.2800(12)  | 0.9914(5)  | 0.101(6)    |
| C66 | 0.2051(18)  | 0.4154(12)  | 0.9741(5)  | 0.103(5)    |
| C67 | 0.151(3)    | 0.4899(19)  | 0.9924(9)  | 0.181(11)   |
| C68 | 0.2074(13)  | 0.4775(9)   | 0.8807(4)  | 0.073(4)    |
| C69 | -0.0615(14) | 0.3176(8)   | 0.7501(4)  | 0.070(4)    |
| C70 | -0.2620(16) | 0.1930(12)  | 0.7688(5)  | 0.097(5)    |
| C71 | -0.3630(18) | 0.2469(14)  | 0.7564(6)  | 0.111(6)    |
| C72 | -0.2822(14) | 0.1492(11)  | 0.8639(5)  | 0.089(5)    |
| C73 | 0.0855(10)  | 0.4059(7)   | 0.8091(3)  | 0.046(2)    |
| C74 | 0.1907(10)  | 0.3827(7)   | 0.7986(3)  | 0.048(3)    |
| C75 | 0.2486(9)   | 0.4281(6)   | 0.7666(3)  | 0.039(2)    |
| C76 | 0.1982(8)   | 0.4984(6)   | 0.7438(3)  | 0.035(2)    |
| C77 | 0.0920(9)   | 0.5227(7)   | 0.7557(3)  | 0.044(2)    |
| C78 | 0.0372(10)  | 0.4784(7)   | 0.7883(3)  | 0.047(3)    |
| C79 | -0.0646(17) | 0.1485(11)  | 0.9238(5)  | 0.101(5)    |
| C80 | -0.2073(15) | 0.2793(12)  | 0.9337(5)  | 0.098(5)    |
| P4  | 0.46850(18) | 0.48548(13) | 0.64429(7) | 0.0250(5)   |

|      |             |             |            |            |
|------|-------------|-------------|------------|------------|
| P5   | 0.2645(2)   | 0.54030(14) | 0.69596(7) | 0.0290(5)  |
| P6   | 0.21442(19) | 0.58539(14) | 0.60251(7) | 0.0266(5)  |
| C81  | 0.5730(8)   | 0.4009(5)   | 0.6420(3)  | 0.0283(18) |
| C82  | 0.6849(8)   | 0.4207(6)   | 0.6435(3)  | 0.038(2)   |
| C83  | 0.7651(9)   | 0.3572(6)   | 0.6426(4)  | 0.044(2)   |
| C84  | 0.7330(8)   | 0.2747(6)   | 0.6406(3)  | 0.038(2)   |
| C85  | 0.6214(8)   | 0.2542(6)   | 0.6387(3)  | 0.035(2)   |
| C86  | 0.5417(8)   | 0.3172(6)   | 0.6393(3)  | 0.0305(19) |
| C87  | 0.5212(7)   | 0.5682(5)   | 0.6064(3)  | 0.0258(17) |
| C88  | 0.5546(8)   | 0.6472(6)   | 0.6155(3)  | 0.034(2)   |
| C89  | 0.5891(8)   | 0.7075(6)   | 0.5838(3)  | 0.036(2)   |
| C90  | 0.5914(8)   | 0.6889(6)   | 0.5446(3)  | 0.037(2)   |
| C91  | 0.5586(8)   | 0.6090(6)   | 0.5350(3)  | 0.038(2)   |
| C92  | 0.5217(7)   | 0.5484(6)   | 0.5658(3)  | 0.0310(19) |
| C93  | 0.4973(7)   | 0.5192(6)   | 0.6950(3)  | 0.0305(19) |
| C94  | 0.4065(8)   | 0.5763(6)   | 0.7100(3)  | 0.0296(19) |
| C95  | 0.1919(8)   | 0.6395(6)   | 0.6793(3)  | 0.033(2)   |
| C96  | 0.2289(7)   | 0.6711(5)   | 0.6361(3)  | 0.0252(17) |
| C97  | 0.2686(8)   | 0.6292(6)   | 0.5525(3)  | 0.0311(19) |
| C98  | 0.2942(8)   | 0.7155(6)   | 0.5443(3)  | 0.0309(19) |
| C99  | 0.3284(8)   | 0.7495(6)   | 0.5056(3)  | 0.036(2)   |
| C100 | 0.3386(8)   | 0.6956(7)   | 0.4744(3)  | 0.039(2)   |
| C101 | 0.3128(8)   | 0.6106(7)   | 0.4824(3)  | 0.038(2)   |
| C102 | 0.2794(8)   | 0.5778(6)   | 0.5204(3)  | 0.0323(19) |
| C103 | 0.0672(8)   | 0.5839(6)   | 0.5906(3)  | 0.0318(19) |
| C104 | 0.0305(8)   | 0.5175(6)   | 0.5686(3)  | 0.037(2)   |
| C105 | -0.0804(8)  | 0.5111(7)   | 0.5590(4)  | 0.043(2)   |
| C106 | -0.1573(9)  | 0.5688(6)   | 0.5718(4)  | 0.045(2)   |
| C107 | -0.1220(9)  | 0.6329(7)   | 0.5944(4)  | 0.045(2)   |
| C108 | -0.0100(8)  | 0.6411(6)   | 0.6028(3)  | 0.036(2)   |
| C109 | 0.3017(7)   | 0.3530(5)   | 0.6819(3)  | 0.0288(19) |
| O3   | 0.3113(7)   | 0.2963(4)   | 0.7057(2)  | 0.0447(18) |
| C110 | 0.1133(7)   | 0.4328(6)   | 0.6532(2)  | 0.0241(18) |

|      |             |             |            |            |
|------|-------------|-------------|------------|------------|
| O4   | 0.0265(6)   | 0.4136(5)   | 0.6646(2)  | 0.0472(19) |
| C12  | 0.29772(19) | 0.37754(13) | 0.58087(7) | 0.0331(5)  |
| O5   | 0.7064(10)  | 0.6617(8)   | 0.7054(4)  | 0.105(3)   |
| C111 | 0.8177(15)  | 0.6364(14)  | 0.7097(7)  | 0.130(6)   |
| C112 | 0.8637(15)  | 0.6838(14)  | 0.7436(7)  | 0.125(6)   |
| C113 | 0.7800(15)  | 0.7417(13)  | 0.7535(7)  | 0.120(6)   |
| C114 | 0.6701(14)  | 0.7124(12)  | 0.7359(6)  | 0.108(5)   |
| O6   | 0.3453(16)  | 1.2127(11)  | 0.8502(5)  | 0.146(5)   |
| C115 | 0.268(2)    | 1.1729(18)  | 0.8788(7)  | 0.167(8)   |
| C116 | 0.325(3)    | 1.168(2)    | 0.9200(6)  | 0.192(10)  |
| C117 | 0.418(3)    | 1.221(2)    | 0.9153(6)  | 0.217(11)  |
| C118 | 0.420(3)    | 1.2604(19)  | 0.8710(7)  | 0.187(10)  |
| O7   | -0.420(3)   | 0.455(3)    | 0.8112(16) | 0.388(19)  |
| C119 | -0.317(5)   | 0.483(4)    | 0.7927(11) | 0.39(2)    |
| C120 | -0.251(4)   | 0.514(4)    | 0.828(2)   | 0.39(2)    |
| C121 | -0.288(5)   | 0.463(5)    | 0.8633(14) | 0.40(2)    |
| C122 | -0.395(5)   | 0.418(4)    | 0.8514(16) | 0.40(2)    |
| O8   | 0.489(4)    | 0.666(5)    | 0.858(4)   | 0.61(3)    |
| C123 | 0.403(11)   | 0.657(6)    | 0.8880(13) | 0.61(3)    |
| C124 | 0.298(6)    | 0.693(6)    | 0.865(4)   | 0.61(3)    |
| C125 | 0.316(9)    | 0.684(6)    | 0.823(3)   | 0.59(3)    |
| C126 | 0.442(10)   | 0.667(6)    | 0.818(2)   | 0.59(3)    |

**Table 3c:3.** Bond lengths [Å] and angles [°] for ljh102 (**3c**).

|          |           |          |           |
|----------|-----------|----------|-----------|
| Re1–P1   | 2.457(2)  | Re1–P2   | 2.309(2)  |
| Re1–P3   | 2.488(2)  | Re1–C54  | 1.908(9)  |
| Re1–C55  | 1.925(9)  | Re1–Cl1  | 2.510(2)  |
| B1–N1    | 1.578(18) | B1–N2    | 1.594(17) |
| B1–C24   | 1.60(2)   | B1–C25   | 1.59(2)   |
| N1–C1    | 1.356(14) | N1–C4    | 1.410(14) |
| N2–C6    | 1.395(14) | N2–C9    | 1.326(15) |
| C1–C2    | 1.431(18) | C1–C10   | 1.498(17) |
| C2–C3    | 1.389(16) | C2–C11   | 1.489(17) |
| C3–C4    | 1.439(16) | C3–C13   | 1.488(16) |
| C4–C5    | 1.399(15) | C5–C6    | 1.400(16) |
| C5–C18   | 1.484(15) | C6–C7    | 1.422(15) |
| C7–C8    | 1.388(17) | C7–C14   | 1.484(16) |
| C8–C9    | 1.394(17) | C8–C15   | 1.532(18) |
| C9–C17   | 1.504(17) | C10–H10A | 0.980     |
| C10–H10B | 0.980     | C10–H10C | 0.980     |
| C11–H11A | 0.990     | C11–H11B | 0.990     |
| C11–C12  | 1.52(2)   | C12–H12A | 0.980     |
| C12–H12B | 0.980     | C12–H12C | 0.980     |
| C13–H13A | 0.980     | C13–H13B | 0.980     |
| C13–H13C | 0.980     | C14–H14A | 0.980     |
| C14–H14B | 0.980     | C14–H14C | 0.980     |
| C15–H15A | 0.990     | C15–H15B | 0.990     |
| C15–C16  | 1.50(2)   | C16–H16A | 0.980     |
| C16–H16B | 0.980     | C16–H16C | 0.980     |
| C17–H17A | 0.980     | C17–H17B | 0.980     |
| C17–H17C | 0.980     | C18–C19  | 1.387(16) |
| C18–C23  | 1.390(15) | C19–H19  | 0.950     |
| C19–C20  | 1.398(14) | C20–H20  | 0.950     |
| C20–C21  | 1.378(13) | C21–C22  | 1.398(14) |
| C21–P2   | 1.832(9)  | C22–H22  | 0.950     |
| C22–C23  | 1.368(15) | C23–H23  | 0.950     |

|          |           |          |           |
|----------|-----------|----------|-----------|
| C24-H24A | 0.980     | C24-H24B | 0.980     |
| C24-H24C | 0.980     | C25-H25A | 0.980     |
| C25-H25B | 0.980     | C25-H25C | 0.980     |
| P1-C26   | 1.826(10) | P1-C32   | 1.835(9)  |
| P1-C38   | 1.856(10) | P2-C39   | 1.863(9)  |
| P2-C40   | 1.831(9)  | P3-C41   | 1.821(9)  |
| P3-C42   | 1.834(9)  | P3-C48   | 1.833(9)  |
| C26-C27  | 1.393(14) | C26-C31  | 1.390(13) |
| C27-H27  | 0.950     | C27-C28  | 1.404(15) |
| C28-H28  | 0.950     | C28-C29  | 1.364(17) |
| C29-H29  | 0.950     | C29-C30  | 1.381(18) |
| C30-H30  | 0.950     | C30-C31  | 1.372(15) |
| C31-H31  | 0.950     | C32-C33  | 1.393(14) |
| C32-C37  | 1.397(13) | C33-H33C | 0.950     |
| C33-C34  | 1.383(14) | C34-H34  | 0.950     |
| C34-C35  | 1.367(15) | C35-H35  | 0.950     |
| C35-C36  | 1.379(17) | C36-H36  | 0.950     |
| C36-C37  | 1.398(14) | C37-H37  | 0.950     |
| C38-H38A | 0.990     | C38-H38B | 0.990     |
| C38-C39  | 1.538(13) | C39-H39A | 0.990     |
| C39-H39B | 0.990     | C40-H40A | 0.990     |
| C40-H40B | 0.990     | C40-C41  | 1.545(13) |
| C41-H41A | 0.990     | C41-H41B | 0.990     |
| C42-C43  | 1.362(14) | C42-C47  | 1.403(14) |
| C43-H43  | 0.950     | C43-C44  | 1.382(14) |
| C44-H44  | 0.950     | C44-C45  | 1.370(16) |
| C45-H45  | 0.950     | C45-C46  | 1.392(16) |
| C46-H46  | 0.950     | C46-C47  | 1.384(14) |
| C47-H47  | 0.950     | C48-C49  | 1.388(13) |
| C48-C53  | 1.384(13) | C49-H49  | 0.950     |
| C49-C50  | 1.406(14) | C50-H50  | 0.950     |
| C50-C51  | 1.383(13) | C51-H51  | 0.950     |
| C51-C52  | 1.381(14) | C52-H52  | 0.950     |
| C52-C53  | 1.380(13) | C53-H53  | 0.950     |

|          |           |          |           |
|----------|-----------|----------|-----------|
| C54-O1   | 1.177(11) | C55-O2   | 1.170(11) |
| Re2-P4   | 2.435(2)  | Re2-P5   | 2.306(2)  |
| Re2-P6   | 2.491(2)  | Re2-C109 | 1.933(9)  |
| Re2-C110 | 1.949(8)  | Re2-Cl2  | 2.504(2)  |
| B2-N3    | 1.59(2)   | B2-N4    | 1.57(2)   |
| B2-C79   | 1.60(3)   | B2-C80   | 1.66(3)   |
| N3-C56   | 1.334(19) | N3-C59   | 1.407(14) |
| N4-C61   | 1.409(14) | N4-C64   | 1.315(19) |
| C56-C57  | 1.40(2)   | C56-C65  | 1.495(18) |
| C57-C58  | 1.382(19) | C57-C66  | 1.51(2)   |
| C58-C59  | 1.42(2)   | C58-C68  | 1.509(18) |
| C59-C60  | 1.420(18) | C60-C61  | 1.370(18) |
| C60-C73  | 1.483(15) | C61-C62  | 1.435(19) |
| C62-C63  | 1.36(2)   | C62-C69  | 1.494(17) |
| C63-C64  | 1.42(2)   | C63-C70  | 1.52(2)   |
| C64-C72  | 1.521(19) | C65-H65A | 0.980     |
| C65-H65B | 0.980     | C65-H65C | 0.980     |
| C66-H66A | 0.990     | C66-H66B | 0.990     |
| C66-C67  | 1.51(3)   | C67-H67A | 0.980     |
| C67-H67B | 0.980     | C67-H67C | 0.980     |
| C68-H68A | 0.980     | C68-H68B | 0.980     |
| C68-H68C | 0.980     | C69-H69A | 0.980     |
| C69-H69B | 0.980     | C69-H69C | 0.980     |
| C70-H70A | 0.990     | C70-H70B | 0.990     |
| C70-C71  | 1.52(3)   | C71-H71A | 0.980     |
| C71-H71B | 0.980     | C71-H71C | 0.980     |
| C72-H72A | 0.980     | C72-H72B | 0.980     |
| C72-H72C | 0.980     | C73-C74  | 1.368(16) |
| C73-C78  | 1.403(16) | C74-H74  | 0.950     |
| C74-C75  | 1.393(14) | C75-H75  | 0.950     |
| C75-C76  | 1.415(14) | C76-C77  | 1.397(15) |
| C76-P5   | 1.816(10) | C77-H77  | 0.950     |
| C77-C78  | 1.381(14) | C78-H78  | 0.950     |
| C79-H79A | 0.980     | C79-H79B | 0.980     |

|           |           |           |           |
|-----------|-----------|-----------|-----------|
| C79–H79C  | 0.980     | C80–H80A  | 0.980     |
| C80–H80B  | 0.980     | C80–H80C  | 0.980     |
| P4–C81    | 1.839(9)  | P4–C87    | 1.822(9)  |
| P4–C93    | 1.837(10) | P5–C94    | 1.884(9)  |
| P5–C95    | 1.832(9)  | P6–C96    | 1.843(9)  |
| P6–C97    | 1.827(9)  | P6–C103   | 1.823(10) |
| C81–C82   | 1.389(14) | C81–C86   | 1.390(13) |
| C82–H82   | 0.950     | C82–C83   | 1.392(14) |
| C83–H83   | 0.950     | C83–C84   | 1.371(15) |
| C84–H84   | 0.950     | C84–C85   | 1.390(15) |
| C85–H85   | 0.950     | C85–C86   | 1.381(13) |
| C86–H86   | 0.950     | C87–C88   | 1.375(13) |
| C87–C92   | 1.399(13) | C88–H88   | 0.950     |
| C88–C89   | 1.399(13) | C89–H89   | 0.950     |
| C89–C90   | 1.349(15) | C90–H90   | 0.950     |
| C90–C91   | 1.393(15) | C91–H91   | 0.950     |
| C91–C92   | 1.390(13) | C92–H92   | 0.950     |
| C93–H93A  | 0.990     | C93–H93B  | 0.990     |
| C93–C94   | 1.524(13) | C94–H94A  | 0.990     |
| C94–H94B  | 0.990     | C95–H95A  | 0.990     |
| C95–H95B  | 0.990     | C95–C96   | 1.516(13) |
| C96–H96A  | 0.990     | C96–H96B  | 0.990     |
| C97–C98   | 1.400(13) | C97–C102  | 1.397(13) |
| C98–H98   | 0.950     | C98–C99   | 1.385(13) |
| C99–H99   | 0.950     | C99–C100  | 1.400(15) |
| C100–H100 | 0.950     | C100–C101 | 1.379(15) |
| C101–H101 | 0.950     | C101–C102 | 1.357(14) |
| C102–H102 | 0.950     | C103–C104 | 1.410(14) |
| C103–C108 | 1.379(13) | C104–H104 | 0.950     |
| C104–C105 | 1.384(15) | C105–H105 | 0.950     |
| C105–C106 | 1.387(15) | C106–H106 | 0.950     |
| C106–C107 | 1.388(16) | C107–H107 | 0.950     |
| C107–C108 | 1.391(15) | C108–H108 | 0.950     |
| C109–O3   | 1.134(11) | C110–O4   | 1.139(10) |



|             |           |             |           |
|-------------|-----------|-------------|-----------|
| O5-C111     | 1.404(16) | O5-C114     | 1.409(15) |
| C111-H11C   | 0.990     | C111-H11D   | 0.990     |
| C111-C112   | 1.515(19) | C112-H11E   | 0.990     |
| C112-H11F   | 0.990     | C112-C113   | 1.42(2)   |
| C113-H11G   | 0.990     | C113-H11H   | 0.990     |
| C113-C114   | 1.545(18) | C114-H11I   | 0.990     |
| C114-H11J   | 0.990     | O6-C115     | 1.421(17) |
| O6-C118     | 1.408(18) | C115-H11K   | 0.990     |
| C115-H11L   | 0.990     | C115-C116   | 1.52(2)   |
| C116-H11M   | 0.990     | C116-H11N   | 0.990     |
| C116-C117   | 1.40(2)   | C117-H11O   | 0.990     |
| C117-H11P   | 0.990     | C117-C118   | 1.519(19) |
| C118-H11Q   | 0.990     | C118-H11R   | 0.990     |
| O7-C119     | 1.431(19) | O7-C122     | 1.424(19) |
| C119-H11S   | 0.990     | C119-H11T   | 0.990     |
| C119-C120   | 1.55(2)   | C120-H12D   | 0.990     |
| C120-H12E   | 0.990     | C120-C121   | 1.40(3)   |
| C121-H12F   | 0.990     | C121-H12G   | 0.990     |
| C121-C122   | 1.55(2)   | C122-H12H   | 0.990     |
| C122-H12I   | 0.990     | O8-C123     | 1.42(2)   |
| O8-C126     | 1.42(2)   | C123-H12J   | 0.990     |
| C123-H12K   | 0.990     | C123-C124   | 1.55(2)   |
| C124-H12L   | 0.990     | C124-H12M   | 0.990     |
| C124-C125   | 1.41(3)   | C125-H12N   | 0.990     |
| C125-H12O   | 0.990     | C125-C126   | 1.54(2)   |
| C126-H12P   | 0.990     | C126-H12Q   | 0.990     |
| P1-Re1-P2   | 82.99(8)  | P1-Re1-P3   | 93.93(7)  |
| P1-Re1-C54  | 85.6(3)   | P1-Re1-C55  | 173.1(3)  |
| P1-Re1-C11  | 93.40(8)  | P2-Re1-P3   | 81.74(8)  |
| P2-Re1-C54  | 92.5(3)   | P2-Re1-C55  | 92.6(3)   |
| P2-Re1-C11  | 171.92(7) | P3-Re1-C54  | 174.2(3)  |
| P3-Re1-C55  | 90.6(3)   | P3-Re1-C11  | 91.32(7)  |
| C54-Re1-C55 | 89.4(4)   | C54-Re1-C11 | 94.5(3)   |

|               |           |               |           |
|---------------|-----------|---------------|-----------|
| C55-Re1-C11   | 91.6(3)   | N1-B1-N2      | 105.1(9)  |
| N1-B1-C24     | 109.8(12) | N1-B1-C25     | 108.6(13) |
| N2-B1-C24     | 109.4(13) | N2-B1-C25     | 109.5(12) |
| C24-B1-C25    | 114.0(13) | B1-N1-C1      | 127.2(9)  |
| B1-N1-C4      | 126.0(9)  | C1-N1-C4      | 106.4(9)  |
| B1-N2-C6      | 125.3(10) | B1-N2-C9      | 127.8(10) |
| C6-N2-C9      | 106.8(9)  | N1-C1-C2      | 110.5(10) |
| N1-C1-C10     | 123.8(12) | C2-C1-C10     | 125.6(11) |
| C1-C2-C3      | 107.7(10) | C1-C2-C11     | 125.7(11) |
| C3-C2-C11     | 126.6(12) | C2-C3-C4      | 105.8(10) |
| C2-C3-C13     | 123.8(10) | C4-C3-C13     | 130.4(10) |
| N1-C4-C3      | 109.6(9)  | N1-C4-C5      | 119.5(10) |
| C3-C4-C5      | 130.8(10) | C4-C5-C6      | 122.3(10) |
| C4-C5-C18     | 117.4(10) | C6-C5-C18     | 120.3(9)  |
| N2-C6-C5      | 120.8(10) | N2-C6-C7      | 109.4(10) |
| C5-C6-C7      | 129.8(10) | C6-C7-C8      | 104.9(10) |
| C6-C7-C14     | 129.4(11) | C8-C7-C14     | 125.6(11) |
| C7-C8-C9      | 108.0(10) | C7-C8-C15     | 126.6(11) |
| C9-C8-C15     | 125.3(12) | N2-C9-C8      | 110.9(11) |
| N2-C9-C17     | 123.8(11) | C8-C9-C17     | 125.3(11) |
| C1-C10-H10A   | 109.5     | C1-C10-H10B   | 109.5     |
| C1-C10-H10C   | 109.5     | H10A-C10-H10B | 109.5     |
| H10A-C10-H10C | 109.5     | H10B-C10-H10C | 109.5     |
| C2-C11-H11A   | 108.7     | C2-C11-H11B   | 108.7     |
| C2-C11-C12    | 114.2(12) | H11A-C11-H11B | 107.6     |
| H11A-C11-C12  | 108.7     | H11B-C11-C12  | 108.7     |
| C11-C12-H12A  | 109.5     | C11-C12-H12B  | 109.5     |
| C11-C12-H12C  | 109.5     | H12A-C12-H12B | 109.5     |
| H12A-C12-H12C | 109.5     | H12B-C12-H12C | 109.5     |
| C3-C13-H13A   | 109.5     | C3-C13-H13B   | 109.5     |
| C3-C13-H13C   | 109.5     | H13A-C13-H13B | 109.5     |
| H13A-C13-H13C | 109.5     | H13B-C13-H13C | 109.5     |
| C7-C14-H14A   | 109.5     | C7-C14-H14B   | 109.5     |
| C7-C14-H14C   | 109.5     | H14A-C14-H14B | 109.5     |

|               |           |               |           |
|---------------|-----------|---------------|-----------|
| H14A-C14-H14C | 109.5     | H14B-C14-H14C | 109.5     |
| C8-C15-H15A   | 108.8     | C8-C15-H15B   | 108.8     |
| C8-C15-C16    | 113.6(13) | H15A-C15-H15B | 107.7     |
| H15A-C15-C16  | 108.8     | H15B-C15-C16  | 108.8     |
| C15-C16-H16A  | 109.5     | C15-C16-H16B  | 109.5     |
| C15-C16-H16C  | 109.5     | H16A-C16-H16B | 109.5     |
| H16A-C16-H16C | 109.5     | H16B-C16-H16C | 109.5     |
| C9-C17-H17A   | 109.5     | C9-C17-H17B   | 109.5     |
| C9-C17-H17C   | 109.5     | H17A-C17-H17B | 109.5     |
| H17A-C17-H17C | 109.5     | H17B-C17-H17C | 109.5     |
| C5-C18-C19    | 121.0(9)  | C5-C18-C23    | 120.9(10) |
| C19-C18-C23   | 117.9(9)  | C18-C19-H19   | 119.3     |
| C18-C19-C20   | 121.4(10) | H19-C19-C20   | 119.3     |
| C19-C20-H20   | 120.0     | C19-C20-C21   | 120.0(9)  |
| H20-C20-C21   | 120.0     | C20-C21-C22   | 118.5(9)  |
| C20-C21-P2    | 121.1(7)  | C22-C21-P2    | 120.4(7)  |
| C21-C22-H22   | 119.4     | C21-C22-C23   | 121.2(9)  |
| H22-C22-C23   | 119.4     | C18-C23-C22   | 120.9(10) |
| C18-C23-H23   | 119.5     | C22-C23-H23   | 119.5     |
| B1-C24-H24A   | 109.5     | B1-C24-H24B   | 109.5     |
| B1-C24-H24C   | 109.5     | H24A-C24-H24B | 109.5     |
| H24A-C24-H24C | 109.5     | H24B-C24-H24C | 109.5     |
| B1-C25-H25A   | 109.5     | B1-C25-H25B   | 109.5     |
| B1-C25-H25C   | 109.5     | H25A-C25-H25B | 109.5     |
| H25A-C25-H25C | 109.5     | H25B-C25-H25C | 109.5     |
| Re1-P1-C26    | 120.5(3)  | Re1-P1-C32    | 121.9(3)  |
| Re1-P1-C38    | 104.8(3)  | C26-P1-C32    | 98.6(4)   |
| C26-P1-C38    | 103.9(4)  | C32-P1-C38    | 105.1(4)  |
| Re1-P2-C21    | 123.7(3)  | Re1-P2-C39    | 112.9(3)  |
| Re1-P2-C40    | 110.8(3)  | C21-P2-C39    | 103.1(4)  |
| C21-P2-C40    | 100.7(4)  | C39-P2-C40    | 103.1(4)  |
| Re1-P3-C41    | 105.9(3)  | Re1-P3-C42    | 113.1(3)  |
| Re1-P3-C48    | 124.7(3)  | C41-P3-C42    | 104.9(4)  |
| C41-P3-C48    | 104.6(4)  | C42-P3-C48    | 101.8(4)  |

|              |           |               |           |
|--------------|-----------|---------------|-----------|
| P1-C26-C27   | 120.2(7)  | P1-C26-C31    | 121.4(7)  |
| C27-C26-C31  | 118.3(9)  | C26-C27-H27   | 120.4     |
| C26-C27-C28  | 119.1(10) | H27-C27-C28   | 120.4     |
| C27-C28-H28  | 119.4     | C27-C28-C29   | 121.3(12) |
| H28-C28-C29  | 119.4     | C28-C29-H29   | 120.2     |
| C28-C29-C30  | 119.6(11) | H29-C29-C30   | 120.2     |
| C29-C30-H30  | 120.1     | C29-C30-C31   | 119.8(11) |
| H30-C30-C31  | 120.1     | C26-C31-C30   | 121.8(11) |
| C26-C31-H31  | 119.1     | C30-C31-H31   | 119.1     |
| P1-C32-C33   | 117.5(7)  | P1-C32-C37    | 123.1(8)  |
| C33-C32-C37  | 119.3(9)  | C32-C33-H33C  | 119.7     |
| C32-C33-C34  | 120.6(9)  | H33C-C33-C34  | 119.7     |
| C33-C34-H34  | 119.9     | C33-C34-C35   | 120.2(11) |
| H34-C34-C35  | 119.9     | C34-C35-H35   | 119.9     |
| C34-C35-C36  | 120.3(10) | H35-C35-C36   | 119.9     |
| C35-C36-H36  | 119.7     | C35-C36-C37   | 120.6(10) |
| H36-C36-C37  | 119.7     | C32-C37-C36   | 119.1(10) |
| C32-C37-H37  | 120.4     | C36-C37-H37   | 120.4     |
| P1-C38-H38A  | 108.9     | P1-C38-H38B   | 108.9     |
| P1-C38-C39   | 113.2(6)  | H38A-C38-H38B | 107.7     |
| H38A-C38-C39 | 108.9     | H38B-C38-C39  | 108.9     |
| P2-C39-C38   | 111.6(6)  | P2-C39-H39A   | 109.3     |
| P2-C39-H39B  | 109.3     | C38-C39-H39A  | 109.3     |
| C38-C39-H39B | 109.3     | H39A-C39-H39B | 108.0     |
| P2-C40-H40A  | 110.0     | P2-C40-H40B   | 110.0     |
| P2-C40-C41   | 108.4(6)  | H40A-C40-H40B | 108.4     |
| H40A-C40-C41 | 110.0     | H40B-C40-C41  | 110.0     |
| P3-C41-C40   | 109.3(6)  | P3-C41-H41A   | 109.8     |
| P3-C41-H41B  | 109.8     | C40-C41-H41A  | 109.8     |
| C40-C41-H41B | 109.8     | H41A-C41-H41B | 108.3     |
| P3-C42-C43   | 118.4(7)  | P3-C42-C47    | 123.4(7)  |
| C43-C42-C47  | 118.2(9)  | C42-C43-H43   | 119.6     |
| C42-C43-C44  | 120.8(10) | H43-C43-C44   | 119.6     |
| C43-C44-H44  | 119.6     | C43-C44-C45   | 120.9(11) |

|               |           |              |           |
|---------------|-----------|--------------|-----------|
| H44-C44-C45   | 119.6     | C44-C45-H45  | 119.9     |
| C44-C45-C46   | 120.2(10) | H45-C45-C46  | 119.9     |
| C45-C46-H46   | 121.0     | C45-C46-C47  | 118.0(11) |
| H46-C46-C47   | 121.0     | C42-C47-C46  | 122.0(10) |
| C42-C47-H47   | 119.0     | C46-C47-H47  | 119.0     |
| P3-C48-C49    | 118.7(7)  | P3-C48-C53   | 122.1(7)  |
| C49-C48-C53   | 119.2(8)  | C48-C49-H49  | 120.3     |
| C48-C49-C50   | 119.4(8)  | H49-C49-C50  | 120.3     |
| C49-C50-H50   | 119.7     | C49-C50-C51  | 120.7(9)  |
| H50-C50-C51   | 119.7     | C50-C51-H51  | 120.4     |
| C50-C51-C52   | 119.2(9)  | H51-C51-C52  | 120.4     |
| C51-C52-H52   | 119.8     | C51-C52-C53  | 120.4(9)  |
| H52-C52-C53   | 119.8     | C48-C53-C52  | 121.1(9)  |
| C48-C53-H53   | 119.5     | C52-C53-H53  | 119.5     |
| Re1-C54-O1    | 177.3(8)  | Re1-C55-O2   | 176.4(8)  |
| P4-Re2-P5     | 82.76(8)  | P4-Re2-P6    | 95.95(7)  |
| P4-Re2-C109   | 88.4(3)   | P4-Re2-C110  | 170.1(2)  |
| P4-Re2-Cl2    | 90.77(8)  | P5-Re2-P6    | 81.76(8)  |
| P5-Re2-C109   | 92.5(3)   | P5-Re2-C110  | 87.8(3)   |
| P5-Re2-Cl2    | 169.86(8) | P6-Re2-C109  | 172.3(3)  |
| P6-Re2-C110   | 85.4(3)   | P6-Re2-Cl2   | 91.20(7)  |
| C109-Re2-C110 | 89.2(4)   | C109-Re2-Cl2 | 95.1(3)   |
| C110-Re2-Cl2  | 99.0(2)   | N3-B2-N4     | 106.6(10) |
| N3-B2-C79     | 110.2(15) | N3-B2-C80    | 107.3(14) |
| N4-B2-C79     | 109.0(14) | N4-B2-C80    | 109.7(14) |
| C79-B2-C80    | 113.8(12) | B2-N3-C56    | 127.6(11) |
| B2-N3-C59     | 124.5(11) | C56-N3-C59   | 107.8(12) |
| B2-N4-C61     | 124.9(12) | B2-N4-C64    | 127.8(11) |
| C61-N4-C64    | 107.3(11) | N3-C56-C57   | 110.5(12) |
| N3-C56-C65    | 125.7(14) | C57-C56-C65  | 123.7(15) |
| C56-C57-C58   | 107.1(14) | C56-C57-C66  | 125.9(13) |
| C58-C57-C66   | 127.0(14) | C57-C58-C59  | 107.2(12) |
| C57-C58-C68   | 123.4(14) | C59-C58-C68  | 129.5(12) |
| N3-C59-C58    | 107.4(11) | N3-C59-C60   | 120.4(12) |

|               |           |               |           |
|---------------|-----------|---------------|-----------|
| C58–C59–C60   | 132.2(11) | C59–C60–C61   | 122.0(10) |
| C59–C60–C73   | 117.4(11) | C61–C60–C73   | 120.5(11) |
| N4–C61–C60    | 121.3(12) | N4–C61–C62    | 108.1(11) |
| C60–C61–C62   | 130.6(11) | C61–C62–C63   | 105.9(11) |
| C61–C62–C69   | 129.6(13) | C63–C62–C69   | 124.5(14) |
| C62–C63–C64   | 108.1(14) | C62–C63–C70   | 127.8(14) |
| C64–C63–C70   | 124.0(13) | N4–C64–C63    | 110.5(12) |
| N4–C64–C72    | 124.8(13) | C63–C64–C72   | 124.6(15) |
| C56–C65–H65A  | 109.5     | C56–C65–H65B  | 109.5     |
| C56–C65–H65C  | 109.5     | H65A–C65–H65B | 109.5     |
| H65A–C65–H65C | 109.5     | H65B–C65–H65C | 109.5     |
| C57–C66–H66A  | 109.7     | C57–C66–H66B  | 109.7     |
| C57–C66–C67   | 110(2)    | H66A–C66–H66B | 108.2     |
| H66A–C66–C67  | 109.7     | H66B–C66–C67  | 109.7     |
| C66–C67–H67A  | 109.5     | C66–C67–H67B  | 109.5     |
| C66–C67–H67C  | 109.5     | H67A–C67–H67B | 109.5     |
| H67A–C67–H67C | 109.5     | H67B–C67–H67C | 109.5     |
| C58–C68–H68A  | 109.5     | C58–C68–H68B  | 109.5     |
| C58–C68–H68C  | 109.5     | H68A–C68–H68B | 109.5     |
| H68A–C68–H68C | 109.5     | H68B–C68–H68C | 109.5     |
| C62–C69–H69A  | 109.5     | C62–C69–H69B  | 109.5     |
| C62–C69–H69C  | 109.5     | H69A–C69–H69B | 109.5     |
| H69A–C69–H69C | 109.5     | H69B–C69–H69C | 109.5     |
| C63–C70–H70A  | 108.8     | C63–C70–H70B  | 108.8     |
| C63–C70–C71   | 113.8(16) | H70A–C70–H70B | 107.7     |
| H70A–C70–C71  | 108.8     | H70B–C70–C71  | 108.8     |
| C70–C71–H71A  | 109.5     | C70–C71–H71B  | 109.5     |
| C70–C71–H71C  | 109.5     | H71A–C71–H71B | 109.5     |
| H71A–C71–H71C | 109.5     | H71B–C71–H71C | 109.5     |
| C64–C72–H72A  | 109.5     | C64–C72–H72B  | 109.5     |
| C64–C72–H72C  | 109.5     | H72A–C72–H72B | 109.5     |
| H72A–C72–H72C | 109.5     | H72B–C72–H72C | 109.5     |
| C60–C73–C74   | 121.3(10) | C60–C73–C78   | 119.4(10) |
| C74–C73–C78   | 119.3(10) | C73–C74–H74   | 119.5     |

|               |           |               |           |
|---------------|-----------|---------------|-----------|
| C73–C74–C75   | 121.0(10) | H74–C74–C75   | 119.5     |
| C74–C75–H75   | 119.9     | C74–C75–C76   | 120.2(10) |
| H75–C75–C76   | 119.9     | C75–C76–C77   | 118.1(9)  |
| C75–C76–P5    | 118.0(8)  | C77–C76–P5    | 123.1(8)  |
| C76–C77–H77   | 119.6     | C76–C77–C78   | 120.9(10) |
| H77–C77–C78   | 119.6     | C73–C78–C77   | 120.5(10) |
| C73–C78–H78   | 119.8     | C77–C78–H78   | 119.8     |
| B2–C79–H79A   | 109.5     | B2–C79–H79B   | 109.5     |
| B2–C79–H79C   | 109.5     | H79A–C79–H79B | 109.5     |
| H79A–C79–H79C | 109.5     | H79B–C79–H79C | 109.5     |
| B2–C80–H80A   | 109.5     | B2–C80–H80B   | 109.5     |
| B2–C80–H80C   | 109.5     | H80A–C80–H80B | 109.5     |
| H80A–C80–H80C | 109.5     | H80B–C80–H80C | 109.5     |
| Re2–P4–C81    | 120.4(3)  | Re2–P4–C87    | 118.3(3)  |
| Re2–P4–C93    | 106.5(3)  | C81–P4–C87    | 102.3(4)  |
| C81–P4–C93    | 100.2(4)  | C87–P4–C93    | 107.1(4)  |
| Re2–P5–C76    | 116.9(3)  | Re2–P5–C94    | 112.3(3)  |
| Re2–P5–C95    | 110.8(3)  | C76–P5–C94    | 105.9(5)  |
| C76–P5–C95    | 106.2(4)  | C94–P5–C95    | 103.8(5)  |
| Re2–P6–C96    | 106.0(3)  | Re2–P6–C97    | 128.1(3)  |
| Re2–P6–C103   | 111.2(3)  | C96–P6–C97    | 105.4(4)  |
| C96–P6–C103   | 105.0(4)  | C97–P6–C103   | 99.1(4)   |
| P4–C81–C82    | 119.6(7)  | P4–C81–C86    | 121.0(7)  |
| C82–C81–C86   | 119.4(8)  | C81–C82–H82   | 119.8     |
| C81–C82–C83   | 120.3(9)  | H82–C82–C83   | 119.8     |
| C82–C83–H83   | 120.2     | C82–C83–C84   | 119.6(10) |
| H83–C83–C84   | 120.2     | C83–C84–H84   | 119.7     |
| C83–C84–C85   | 120.6(9)  | H84–C84–C85   | 119.7     |
| C84–C85–H85   | 120.1     | C84–C85–C86   | 119.9(9)  |
| H85–C85–C86   | 120.1     | C81–C86–C85   | 120.1(9)  |
| C81–C86–H86   | 119.9     | C85–C86–H86   | 119.9     |
| P4–C87–C88    | 124.1(8)  | P4–C87–C92    | 115.5(7)  |
| C88–C87–C92   | 120.3(9)  | C87–C88–H88   | 120.3     |
| C87–C88–C89   | 119.5(10) | H88–C88–C89   | 120.3     |

|                |           |                |           |
|----------------|-----------|----------------|-----------|
| C88–C89–H89    | 119.6     | C88–C89–C90    | 120.8(10) |
| H89–C89–C90    | 119.6     | C89–C90–H90    | 119.9     |
| C89–C90–C91    | 120.2(9)  | H90–C90–C91    | 119.9     |
| C90–C91–H91    | 119.9     | C90–C91–C92    | 120.1(10) |
| H91–C91–C92    | 119.9     | C87–C92–C91    | 119.0(9)  |
| C87–C92–H92    | 120.5     | C91–C92–H92    | 120.5     |
| P4–C93–H93A    | 109.1     | P4–C93–H93B    | 109.1     |
| P4–C93–C94     | 112.5(6)  | H93A–C93–H93B  | 107.8     |
| H93A–C93–C94   | 109.1     | H93B–C93–C94   | 109.1     |
| P5–C94–C93     | 111.6(6)  | P5–C94–H94A    | 109.3     |
| P5–C94–H94B    | 109.3     | C93–C94–H94A   | 109.3     |
| C93–C94–H94B   | 109.3     | H94A–C94–H94B  | 108.0     |
| P5–C95–H95A    | 109.8     | P5–C95–H95B    | 109.8     |
| P5–C95–C96     | 109.6(6)  | H95A–C95–H95B  | 108.2     |
| H95A–C95–C96   | 109.8     | H95B–C95–C96   | 109.8     |
| P6–C96–C95     | 109.6(6)  | P6–C96–H96A    | 109.7     |
| P6–C96–H96B    | 109.7     | C95–C96–H96A   | 109.7     |
| C95–C96–H96B   | 109.7     | H96A–C96–H96B  | 108.2     |
| P6–C97–C98     | 121.6(7)  | P6–C97–C102    | 120.5(7)  |
| C98–C97–C102   | 117.9(8)  | C97–C98–H98    | 119.3     |
| C97–C98–C99    | 121.4(9)  | H98–C98–C99    | 119.3     |
| C98–C99–H99    | 120.6     | C98–C99–C100   | 118.8(9)  |
| H99–C99–C100   | 120.6     | C99–C100–H100  | 120.1     |
| C99–C100–C101  | 119.8(9)  | H100–C100–C101 | 120.1     |
| C100–C101–H101 | 119.5     | C100–C101–C102 | 121.0(10) |
| H101–C101–C102 | 119.5     | C97–C102–C101  | 121.1(9)  |
| C97–C102–H102  | 119.4     | C101–C102–H102 | 119.4     |
| P6–C103–C104   | 117.0(7)  | P6–C103–C108   | 124.6(8)  |
| C104–C103–C108 | 118.4(9)  | C103–C104–H104 | 119.8     |
| C103–C104–C105 | 120.4(9)  | H104–C104–C105 | 119.8     |
| C104–C105–H105 | 119.7     | C104–C105–C106 | 120.5(10) |
| H105–C105–C106 | 119.7     | C105–C106–H106 | 120.4     |
| C105–C106–C107 | 119.3(10) | H106–C106–C107 | 120.4     |
| C106–C107–H107 | 119.9     | C106–C107–C108 | 120.2(10) |



|                |           |                |           |
|----------------|-----------|----------------|-----------|
| H107-C107-C108 | 119.9     | C103-C108-C107 | 121.1(10) |
| C103-C108-H108 | 119.4     | C107-C108-H108 | 119.4     |
| Re2-C109-O3    | 174.2(8)  | Re2-C110-O4    | 168.1(8)  |
| C111-O5-C114   | 112.9(14) | O5-C111-H11C   | 110.5     |
| O5-C111-H11D   | 110.5     | O5-C111-C112   | 106.3(13) |
| H11C-C111-H11D | 108.7     | H11C-C111-C112 | 110.5     |
| H11D-C111-C112 | 110.5     | C111-C112-H11E | 110.5     |
| C111-C112-H11F | 110.5     | C111-C112-C113 | 106.3(12) |
| H11E-C112-H11F | 108.7     | H11E-C112-C113 | 110.5     |
| H11F-C112-C113 | 110.5     | C112-C113-H11G | 110.2     |
| C112-C113-H11H | 110.2     | C112-C113-C114 | 107.3(12) |
| H11G-C113-H11H | 108.5     | H11G-C113-C114 | 110.2     |
| H11H-C113-C114 | 110.2     | O5-C114-C113   | 102.9(12) |
| O5-C114-H11I   | 111.2     | O5-C114-H11J   | 111.2     |
| C113-C114-H11I | 111.2     | C113-C114-H11J | 111.2     |
| H11I-C114-H11J | 109.1     | C115-O6-C118   | 109.2(16) |
| O6-C115-H11K   | 110.7     | O6-C115-H11L   | 110.7     |
| O6-C115-C116   | 105.0(15) | H11K-C115-H11L | 108.8     |
| H11K-C115-C116 | 110.7     | H11L-C115-C116 | 110.7     |
| C115-C116-H11M | 110.2     | C115-C116-H11N | 110.2     |
| C115-C116-C117 | 107.4(13) | H11M-C116-H11N | 108.5     |
| H11M-C116-C117 | 110.2     | H11N-C116-C117 | 110.2     |
| C116-C117-H11O | 110.3     | C116-C117-H11P | 110.3     |
| C116-C117-C118 | 107.1(14) | H11O-C117-H11P | 108.6     |
| H11O-C117-C118 | 110.3     | H11P-C117-C118 | 110.3     |
| O6-C118-C117   | 105.8(15) | O6-C118-H11Q   | 110.6     |
| O6-C118-H11R   | 110.6     | C117-C118-H11Q | 110.6     |
| C117-C118-H11R | 110.6     | H11Q-C118-H11R | 108.7     |
| C119-O7-C122   | 106(2)    | O7-C119-H11S   | 111.0     |
| O7-C119-H11T   | 111.0     | O7-C119-C120   | 104(2)    |
| H11S-C119-H11T | 109.0     | H11S-C119-C120 | 111.0     |
| H11T-C119-C120 | 111.0     | C119-C120-H12D | 110.8     |
| C119-C120-H12E | 110.8     | C119-C120-C121 | 104.6(18) |
| H12D-C120-H12E | 108.9     | H12D-C120-C121 | 110.8     |

|                |           |                |           |
|----------------|-----------|----------------|-----------|
| H12E-C120-C121 | 110.8     | C120-C121-H12F | 110.3     |
| C120-C121-H12G | 110.3     | C120-C121-C122 | 107.2(15) |
| H12F-C121-H12G | 108.5     | H12F-C121-C122 | 110.3     |
| H12G-C121-C122 | 110.3     | O7-C122-C121   | 105.6(19) |
| O7-C122-H12H   | 110.6     | O7-C122-H12I   | 110.6     |
| C121-C122-H12H | 110.6     | C121-C122-H12I | 110.6     |
| H12H-C122-H12I | 108.8     | C123-O8-C126   | 109(3)    |
| O8-C123-H12J   | 110.8     | O8-C123-H12K   | 110.8     |
| O8-C123-C124   | 105(2)    | H12J-C123-H12K | 108.9     |
| H12J-C123-C124 | 110.8     | H12K-C123-C124 | 110.8     |
| C123-C124-H12L | 110.4     | C123-C124-H12M | 110.4     |
| C123-C124-C125 | 106(2)    | H12L-C124-H12M | 108.6     |
| H12L-C124-C125 | 110.4     | H12M-C124-C125 | 110.4     |
| C124-C125-H12N | 110.5     | C124-C125-H12O | 110.5     |
| C124-C125-C126 | 106.3(16) | H12N-C125-H12O | 108.7     |
| H12N-C125-C126 | 110.5     | H12O-C125-C126 | 110.5     |
| O8-C126-C125   | 106.9(19) | O8-C126-H12P   | 110.3     |
| O8-C126-H12Q   | 110.3     | C125-C126-H12P | 110.3     |
| C125-C126-H12Q | 110.3     | H12P-C126-H12Q | 108.6     |

**Table 3c:4.** Torsion angles [°] for ljh102 (**3c**).

|              |            |               |            |
|--------------|------------|---------------|------------|
| N2–B1–N1–C1  | 176.4(12)  | N2–B1–N1–C4   | –11.3(19)  |
| C24–B1–N1–C1 | 58.8(19)   | C24–B1–N1–C4  | –128.9(13) |
| C25–B1–N1–C1 | –66.5(17)  | C25–B1–N1–C4  | 105.9(14)  |
| N1–B1–N2–C6  | 6.8(18)    | N1–B1–N2–C9   | –175.9(12) |
| C24–B1–N2–C6 | 124.7(13)  | C24–B1–N2–C9  | –58.1(19)  |
| C25–B1–N2–C6 | –109.7(14) | C25–B1–N2–C9  | 67.5(18)   |
| B1–N1–C1–C2  | 173.5(13)  | B1–N1–C1–C10  | –5(2)      |
| C4–N1–C1–C2  | 0.0(15)    | C4–N1–C1–C10  | –178.2(13) |
| N1–C1–C2–C3  | –0.1(16)   | N1–C1–C2–C11  | –179.1(13) |
| C10–C1–C2–C3 | 178.0(14)  | C10–C1–C2–C11 | –1(2)      |
| C1–C2–C3–C4  | 0.2(15)    | C1–C2–C3–C13  | –179.6(12) |
| C11–C2–C3–C4 | 179.2(14)  | C11–C2–C3–C13 | –1(2)      |
| B1–N1–C4–C3  | –173.5(13) | B1–N1–C4–C5   | 9.0(19)    |
| C1–N1–C4–C3  | 0.2(14)    | C1–N1–C4–C5   | –177.3(11) |
| C2–C3–C4–N1  | –0.2(14)   | C2–C3–C4–C5   | 176.9(13)  |
| C13–C3–C4–N1 | 179.6(12)  | C13–C3–C4–C5  | –3(2)      |
| N1–C4–C5–C6  | –0.3(17)   | N1–C4–C5–C18  | –179.0(10) |
| C3–C4–C5–C6  | –177.2(12) | C3–C4–C5–C18  | 4.1(19)    |
| B1–N2–C6–C5  | –0.2(19)   | B1–N2–C6–C7   | 178.8(12)  |
| C9–N2–C6–C5  | –177.9(11) | C9–N2–C6–C7   | 1.0(14)    |
| C4–C5–C6–N2  | –3.9(18)   | C4–C5–C6–C7   | 177.4(12)  |
| C18–C5–C6–N2 | 174.7(10)  | C18–C5–C6–C7  | –4.0(19)   |
| N2–C6–C7–C8  | 0.2(14)    | N2–C6–C7–C14  | 177.2(12)  |
| C5–C6–C7–C8  | 179.0(13)  | C5–C6–C7–C14  | –4(2)      |
| C6–C7–C8–C9  | –1.3(15)   | C6–C7–C8–C15  | –177.9(14) |
| C14–C7–C8–C9 | –178.5(12) | C14–C7–C8–C15 | 5(2)       |
| B1–N2–C9–C8  | –179.5(13) | B1–N2–C9–C17  | 0(2)       |
| C6–N2–C9–C8  | –1.9(15)   | C6–N2–C9–C17  | 177.6(13)  |
| C7–C8–C9–N2  | 2.1(17)    | C7–C8–C9–C17  | –177.4(14) |
| C15–C8–C9–N2 | 178.7(13)  | C15–C8–C9–C17 | –1(2)      |

|                 |            |                 |           |
|-----------------|------------|-----------------|-----------|
| C1-C2-C11-C12   | 96.4(17)   | C3-C2-C11-C12   | -82.4(18) |
| C7-C8-C15-C16   | 91.1(19)   | C9-C8-C15-C16   | -85.0(17) |
| C4-C5-C18-C19   | -87.3(14)  | C4-C5-C18-C23   | 87.6(13)  |
| C6-C5-C18-C19   | 94.0(14)   | C6-C5-C18-C23   | -91.1(14) |
| C5-C18-C19-C20  | 175.2(10)  | C23-C18-C19-C20 | 0.2(16)   |
| C18-C19-C20-C21 | 0.3(16)    | C19-C20-C21-C22 | 0.7(15)   |
| C19-C20-C21-P2  | 179.3(8)   | C20-C21-C22-C23 | -2.2(15)  |
| P2-C21-C22-C23  | 179.1(8)   | C21-C22-C23-C18 | 2.8(17)   |
| C5-C18-C23-C22  | -176.8(10) | C19-C18-C23-C22 | -1.7(16)  |
| C20-C21-P2-Re1  | 2.4(10)    | C20-C21-P2-C39  | 131.9(8)  |
| C20-C21-P2-C40  | -121.7(8)  | C22-C21-P2-Re1  | -179.0(6) |
| C22-C21-P2-C39  | -49.5(9)   | C22-C21-P2-C40  | 56.9(9)   |
| Re1-P1-C26-C27  | -13.2(10)  | Re1-P1-C26-C31  | 168.8(7)  |
| C32-P1-C26-C27  | 122.0(9)   | C32-P1-C26-C31  | -56.0(9)  |
| C38-P1-C26-C27  | -130.0(9)  | C38-P1-C26-C31  | 52.0(9)   |
| P1-C26-C27-C28  | -175.0(9)  | C31-C26-C27-C28 | 3.1(17)   |
| C26-C27-C28-C29 | -2(2)      | C27-C28-C29-C30 | -1(2)     |
| C28-C29-C30-C31 | 2.8(18)    | C29-C30-C31-C26 | -1.5(17)  |
| P1-C26-C31-C30  | 176.5(8)   | C27-C26-C31-C30 | -1.6(15)  |
| Re1-P1-C32-C33  | 81.5(8)    | Re1-P1-C32-C37  | -93.4(7)  |
| C26-P1-C32-C33  | -52.9(8)   | C26-P1-C32-C37  | 132.3(8)  |
| C38-P1-C32-C33  | -159.8(7)  | C38-P1-C32-C37  | 25.3(9)   |
| P1-C32-C33-C34  | -177.1(7)  | C37-C32-C33-C34 | -2.0(14)  |
| C32-C33-C34-C35 | 1.7(15)    | C33-C34-C35-C36 | -0.5(15)  |
| C34-C35-C36-C37 | -0.3(16)   | P1-C32-C37-C36  | 176.0(7)  |
| C33-C32-C37-C36 | 1.2(13)    | C35-C36-C37-C32 | -0.1(14)  |
| Re1-P1-C38-C39  | 41.5(7)    | C26-P1-C38-C39  | 168.8(6)  |
| C32-P1-C38-C39  | -88.1(7)   | P1-C38-C39-P2   | -38.0(8)  |
| Re1-P2-C39-C38  | 16.2(8)    | C21-P2-C39-C38  | -119.6(7) |
| C40-P2-C39-C38  | 135.8(7)   | Re1-P2-C40-C41  | 42.6(7)   |
| C21-P2-C40-C41  | 175.1(6)   | C39-P2-C40-C41  | -78.5(7)  |
| P2-C40-C41-P3   | -53.8(7)   | Re1-P3-C41-C40  | 41.1(7)   |

|                 |            |                 |            |
|-----------------|------------|-----------------|------------|
| C42-P3-C41-C40  | -78.8(7)   | C48-P3-C41-C40  | 174.5(6)   |
| Re1-P3-C42-C43  | 55.1(8)    | Re1-P3-C42-C47  | -125.0(7)  |
| C41-P3-C42-C43  | 170.1(7)   | C41-P3-C42-C47  | -10.0(9)   |
| C48-P3-C42-C43  | -81.1(8)   | C48-P3-C42-C47  | 98.8(8)    |
| P3-C42-C43-C44  | 179.9(7)   | C47-C42-C43-C44 | 0.0(14)    |
| C42-C43-C44-C45 | 0.8(15)    | C43-C44-C45-C46 | -0.9(15)   |
| C44-C45-C46-C47 | 0.2(15)    | C45-C46-C47-C42 | 0.6(15)    |
| P3-C42-C47-C46  | 179.4(8)   | C43-C42-C47-C46 | -0.7(15)   |
| Re1-P3-C48-C49  | -48.1(8)   | Re1-P3-C48-C53  | 135.1(6)   |
| C41-P3-C48-C49  | -169.8(7)  | C41-P3-C48-C53  | 13.4(8)    |
| C42-P3-C48-C49  | 81.1(8)    | C42-P3-C48-C53  | -95.6(8)   |
| P3-C48-C49-C50  | -177.6(7)  | C53-C48-C49-C50 | -0.7(13)   |
| C48-C49-C50-C51 | 1.3(13)    | C49-C50-C51-C52 | -2.0(14)   |
| C50-C51-C52-C53 | 2.2(14)    | C51-C52-C53-C48 | -1.6(14)   |
| P3-C48-C53-C52  | 177.6(7)   | C49-C48-C53-C52 | 0.9(13)    |
| N4-B2-N3-C56    | 178.0(14)  | N4-B2-N3-C59    | 3(2)       |
| C79-B2-N3-C56   | -64(2)     | C79-B2-N3-C59   | 120.9(15)  |
| C80-B2-N3-C56   | 61(2)      | C80-B2-N3-C59   | -114.7(14) |
| N3-B2-N4-C61    | 2(2)       | N3-B2-N4-C64    | -179.3(15) |
| C79-B2-N4-C61   | -116.6(15) | C79-B2-N4-C64   | 62(2)      |
| C80-B2-N4-C61   | 118.2(15)  | C80-B2-N4-C64   | -63(2)     |
| B2-N3-C56-C57   | -176.6(15) | B2-N3-C56-C65   | 5(3)       |
| C59-N3-C56-C57  | -0.6(18)   | C59-N3-C56-C65  | -179.5(16) |
| N3-C56-C57-C58  | 1(2)       | N3-C56-C57-C66  | -176.0(17) |
| C65-C56-C57-C58 | -179.6(16) | C65-C56-C57-C66 | 3(3)       |
| C56-C57-C58-C59 | -1.7(18)   | C56-C57-C58-C68 | 177.6(14)  |
| C66-C57-C58-C59 | 175.8(17)  | C66-C57-C58-C68 | -5(3)      |
| B2-N3-C59-C58   | 175.7(14)  | B2-N3-C59-C60   | -5(2)      |
| C56-N3-C59-C58  | -0.4(16)   | C56-N3-C59-C60  | 179.1(13)  |
| C57-C58-C59-N3  | 1.3(16)    | C57-C58-C59-C60 | -178.2(15) |
| C68-C58-C59-N3  | -177.9(14) | C68-C58-C59-C60 | 3(3)       |
| N3-C59-C60-C61  | 2(2)       | N3-C59-C60-C73  | -174.0(11) |

|                 |            |                 |            |
|-----------------|------------|-----------------|------------|
| C58-C59-C60-C61 | -179.0(14) | C58-C59-C60-C73 | 5(2)       |
| C59-C60-C61-N4  | 3(2)       | C59-C60-C61-C62 | -177.3(14) |
| C73-C60-C61-N4  | 178.9(11)  | C73-C60-C61-C62 | -2(2)      |
| B2-N4-C61-C60   | -5(2)      | B2-N4-C61-C62   | 175.1(14)  |
| C64-N4-C61-C60  | 175.9(14)  | C64-N4-C61-C62  | -3.5(16)   |
| N4-C61-C62-C63  | 3.2(16)    | N4-C61-C62-C69  | -175.5(14) |
| C60-C61-C62-C63 | -176.2(15) | C60-C61-C62-C69 | 5(3)       |
| C61-C62-C63-C64 | -1.7(18)   | C61-C62-C63-C70 | -179.8(17) |
| C69-C62-C63-C64 | 177.1(14)  | C69-C62-C63-C70 | -1(3)      |
| B2-N4-C64-C63   | -176.1(15) | B2-N4-C64-C72   | 0(3)       |
| C61-N4-C64-C63  | 2.5(18)    | C61-N4-C64-C72  | 178.6(15)  |
| C62-C63-C64-N4  | -1(2)      | C62-C63-C64-C72 | -176.6(16) |
| C70-C63-C64-N4  | 177.7(16)  | C70-C63-C64-C72 | 2(3)       |
| C56-C57-C66-C67 | -90(2)     | C58-C57-C66-C67 | 93(2)      |
| C62-C63-C70-C71 | -89(2)     | C64-C63-C70-C71 | 93(2)      |
| C59-C60-C73-C74 | 73.2(16)   | C59-C60-C73-C78 | -108.3(14) |
| C61-C60-C73-C74 | -102.5(16) | C61-C60-C73-C78 | 76.0(16)   |
| C60-C73-C74-C75 | 176.1(11)  | C78-C73-C74-C75 | -2.5(18)   |
| C73-C74-C75-C76 | -1.1(17)   | C74-C75-C76-C77 | 3.0(16)    |
| C74-C75-C76-P5  | -166.8(9)  | C75-C76-C77-C78 | -1.2(17)   |
| P5-C76-C77-C78  | 168.1(9)   | C76-C77-C78-C73 | -2.5(18)   |
| C60-C73-C78-C77 | -174.3(11) | C74-C73-C78-C77 | 4.3(18)    |
| C75-C76-P5-Re2  | 64.9(9)    | C75-C76-P5-C94  | -61.0(9)   |
| C75-C76-P5-C95  | -170.9(8)  | C77-C76-P5-Re2  | -104.3(9)  |
| C77-C76-P5-C94  | 129.8(9)   | C77-C76-P5-C95  | 19.8(11)   |
| Re2-P4-C81-C82  | -178.0(7)  | Re2-P4-C81-C86  | 1.3(9)     |
| C87-P4-C81-C82  | 48.3(9)    | C87-P4-C81-C86  | -132.4(8)  |
| C93-P4-C81-C82  | -61.9(9)   | C93-P4-C81-C86  | 117.4(8)   |
| P4-C81-C82-C83  | 178.7(8)   | C86-C81-C82-C83 | -0.6(15)   |
| C81-C82-C83-C84 | -0.4(16)   | C82-C83-C84-C85 | 1.1(16)    |
| C83-C84-C85-C86 | -0.7(15)   | C84-C85-C86-C81 | -0.3(14)   |
| P4-C81-C86-C85  | -178.3(7)  | C82-C81-C86-C85 | 1.0(14)    |

|                     |           |                     |           |
|---------------------|-----------|---------------------|-----------|
| Re2-P4-C87-C88      | 108.3(7)  | Re2-P4-C87-C92      | -68.9(7)  |
| C81-P4-C87-C88      | -116.7(8) | C81-P4-C87-C92      | 66.1(7)   |
| C93-P4-C87-C88      | -11.8(9)  | C93-P4-C87-C92      | 170.9(6)  |
| P4-C87-C88-C89      | -177.1(7) | C92-C87-C88-C89     | 0.0(13)   |
| C87-C88-C89-C90     | -0.9(14)  | C88-C89-C90-C91     | 0.4(14)   |
| C89-C90-C91-C92     | 0.9(14)   | C90-C91-C92-C87     | -1.8(13)  |
| P4-C87-C92-C91      | 178.7(7)  | C88-C87-C92-C91     | 1.3(13)   |
| Re2-P4-C93-C94      | -41.1(7)  | C81-P4-C93-C94      | -167.3(6) |
| C87-P4-C93-C94      | 86.3(7)   | P4-C93-C94-P5       | 38.7(8)   |
| Re2-P5-C94-C93      | -18.6(7)  | C76-P5-C94-C93      | 110.1(7)  |
| C95-P5-C94-C93      | -138.3(7) | Re2-P5-C95-C96      | -42.6(7)  |
| C76-P5-C95-C96      | -170.5(7) | C94-P5-C95-C96      | 78.1(7)   |
| P5-C95-C96-P6       | 52.3(8)   | Re2-P6-C96-C95      | -38.8(7)  |
| C97-P6-C96-C95      | -176.9(6) | C103-P6-C96-C95     | 79.0(7)   |
| Re2-P6-C97-C98      | -135.0(7) | Re2-P6-C97-C102     | 48.8(10)  |
| C96-P6-C97-C98      | -9.7(9)   | C96-P6-C97-C102     | 174.1(8)  |
| C103-P6-C97-C98     | 98.7(9)   | C103-P6-C97-C102    | -77.5(8)  |
| P6-C97-C98-C99      | -175.7(7) | C102-C97-C98-C99    | 0.6(14)   |
| C97-C98-C99-C100    | -0.9(14)  | C98-C99-C100-C101   | 1.2(15)   |
| C99-C100-C101-C102  | -1.2(15)  | C100-C101-C102-C97  | 0.9(15)   |
| P6-C97-C102-C101    | 175.8(8)  | C98-C97-C102-C101   | -0.6(14)  |
| Re2-P6-C103-C104    | -59.2(8)  | Re2-P6-C103-C108    | 118.5(8)  |
| C96-P6-C103-C104    | -173.4(7) | C96-P6-C103-C108    | 4.4(9)    |
| C97-P6-C103-C104    | 77.9(8)   | C97-P6-C103-C108    | -104.3(9) |
| P6-C103-C104-C105   | 178.8(8)  | C108-C103-C104-C105 | 0.9(14)   |
| C103-C104-C105-C106 | -1.4(16)  | C104-C105-C106-C107 | -0.4(16)  |
| C105-C106-C107-C108 | 2.6(16)   | P6-C103-C108-C107   | -176.4(8) |
| C104-C103-C108-C107 | 1.4(14)   | C106-C107-C108-C103 | -3.1(16)  |
| C114-O5-C111-C112   | -7(3)     | O5-C111-C112-C113   | -7(3)     |
| C111-C112-C113-C114 | 17(3)     | C111-O5-C114-C113   | 17(2)     |
| C112-C113-C114-O5   | -21(2)    | C118-O6-C115-C116   | -23(3)    |
| O6-C115-C116-C117   | 14(4)     | C115-C116-C117-C118 | 0(5)      |

|                     |        |                     |         |
|---------------------|--------|---------------------|---------|
| C115-O6-C118-C117   | 23(3)  | C116-C117-C118-O6   | -14(4)  |
| C122-O7-C119-C120   | -36(6) | O7-C119-C120-C121   | 32(6)   |
| C119-C120-C121-C122 | -15(8) | C119-O7-C122-C121   | 27(7)   |
| C120-C121-C122-O7   | -7(8)  | C126-O8-C123-C124   | -25(9)  |
| O8-C123-C124-C125   | 25(9)  | C123-C124-C125-C126 | -15(11) |
| C123-O8-C126-C125   | 16(12) | C124-C125-C126-O8   | 0(13)   |



**Table 3c:5.** Anisotropic displacement parameters ( $\text{\AA}^2$ ) for ljh102 (**3c**). The anisotropic displacement factor exponent takes the form:  $-2\pi^2[h^2a^{*2}U^{11} + \dots + 2hka^*b^*U^{12}]$

|     | U <sup>11</sup> | U <sup>22</sup> | U <sup>33</sup> | U <sup>23</sup> | U <sup>13</sup> | U <sup>12</sup> |
|-----|-----------------|-----------------|-----------------|-----------------|-----------------|-----------------|
| Re1 | 0.0237(2)       | 0.0201(2)       | 0.0257(2)       | -0.00162(15)    | -0.00410(16)    | -0.00263(15)    |
| B1  | 0.048(5)        | 0.110(8)        | 0.034(5)        | 0.017(5)        | -0.013(4)       | -0.014(5)       |
| N1  | 0.048(4)        | 0.069(6)        | 0.029(4)        | 0.008(3)        | -0.008(3)       | -0.008(3)       |
| N2  | 0.042(4)        | 0.069(6)        | 0.037(4)        | 0.008(3)        | -0.012(3)       | -0.007(3)       |
| C1  | 0.051(5)        | 0.078(8)        | 0.040(4)        | 0.011(4)        | -0.004(3)       | -0.012(4)       |
| C2  | 0.048(4)        | 0.076(7)        | 0.043(4)        | 0.008(4)        | -0.002(3)       | -0.013(4)       |
| C3  | 0.040(4)        | 0.054(6)        | 0.039(4)        | 0.001(4)        | -0.007(3)       | -0.008(4)       |
| C4  | 0.041(4)        | 0.057(6)        | 0.033(4)        | 0.003(4)        | -0.008(3)       | -0.006(4)       |
| C5  | 0.045(4)        | 0.049(6)        | 0.031(4)        | 0.000(3)        | -0.010(3)       | -0.004(3)       |
| C6  | 0.042(4)        | 0.053(6)        | 0.035(4)        | 0.001(4)        | -0.011(3)       | -0.004(3)       |
| C7  | 0.047(5)        | 0.065(7)        | 0.037(4)        | 0.003(4)        | -0.004(3)       | -0.001(4)       |
| C8  | 0.045(4)        | 0.085(8)        | 0.047(5)        | 0.010(4)        | -0.007(3)       | 0.001(4)        |
| C9  | 0.044(4)        | 0.071(7)        | 0.045(4)        | 0.007(4)        | -0.012(3)       | -0.007(4)       |
| C10 | 0.073(9)        | 0.115(12)       | 0.044(5)        | 0.020(6)        | -0.005(5)       | -0.013(8)       |
| C11 | 0.045(5)        | 0.110(9)        | 0.045(6)        | 0.010(6)        | -0.007(4)       | -0.017(5)       |
| C12 | 0.045(7)        | 0.120(9)        | 0.063(8)        | -0.003(7)       | 0.002(6)        | -0.017(6)       |
| C13 | 0.042(6)        | 0.085(9)        | 0.041(6)        | 0.000(5)        | -0.010(4)       | -0.004(5)       |
| C14 | 0.050(7)        | 0.072(8)        | 0.036(5)        | -0.001(4)       | -0.003(4)       | 0.004(6)        |
| C15 | 0.045(6)        | 0.116(9)        | 0.054(7)        | 0.012(6)        | -0.005(5)       | 0.003(5)        |
| C16 | 0.058(8)        | 0.130(10)       | 0.053(8)        | 0.006(7)        | 0.007(7)        | -0.018(7)       |
| C17 | 0.040(6)        | 0.121(12)       | 0.052(6)        | 0.019(7)        | -0.014(5)       | -0.009(6)       |
| C18 | 0.039(5)        | 0.049(4)        | 0.030(4)        | 0.000(3)        | -0.005(3)       | -0.007(4)       |
| C19 | 0.050(6)        | 0.042(5)        | 0.035(4)        | 0.003(3)        | -0.011(4)       | -0.003(4)       |
| C20 | 0.040(5)        | 0.035(4)        | 0.030(4)        | -0.002(3)       | -0.015(4)       | -0.009(3)       |
| C21 | 0.029(4)        | 0.034(4)        | 0.026(4)        | -0.001(3)       | -0.006(3)       | -0.006(3)       |
| C22 | 0.047(5)        | 0.037(4)        | 0.029(4)        | 0.001(3)        | -0.008(4)       | -0.010(4)       |
| C23 | 0.051(6)        | 0.043(4)        | 0.034(5)        | -0.003(3)       | -0.013(4)       | -0.006(4)       |

|     |            |            |            |            |            |            |
|-----|------------|------------|------------|------------|------------|------------|
| C24 | 0.057(8)   | 0.133(9)   | 0.077(9)   | 0.043(7)   | -0.009(7)  | -0.003(7)  |
| C25 | 0.076(9)   | 0.145(10)  | 0.051(7)   | -0.010(7)  | 0.004(6)   | -0.036(7)  |
| P1  | 0.0262(12) | 0.0242(11) | 0.0306(12) | -0.0030(9) | -0.0022(9) | -0.0015(9) |
| P2  | 0.0286(12) | 0.0271(12) | 0.0249(12) | -0.0025(9) | -0.0054(9) | -0.0018(9) |
| P3  | 0.0242(11) | 0.0207(11) | 0.0239(11) | -0.0021(8) | -0.0036(9) | 0.0002(8)  |
| C26 | 0.028(4)   | 0.029(4)   | 0.030(5)   | 0.002(3)   | -0.004(3)  | -0.002(3)  |
| C27 | 0.032(4)   | 0.040(4)   | 0.070(7)   | -0.012(4)  | -0.004(4)  | -0.006(3)  |
| C28 | 0.034(5)   | 0.063(6)   | 0.082(8)   | -0.019(5)  | -0.003(5)  | -0.021(4)  |
| C29 | 0.036(5)   | 0.072(6)   | 0.054(7)   | 0.001(5)   | -0.004(4)  | -0.012(4)  |
| C30 | 0.027(4)   | 0.067(5)   | 0.045(6)   | 0.005(4)   | -0.002(4)  | -0.001(4)  |
| C31 | 0.030(4)   | 0.044(5)   | 0.041(5)   | 0.004(4)   | -0.003(4)  | 0.004(3)   |
| C32 | 0.022(4)   | 0.027(3)   | 0.032(4)   | -0.003(3)  | 0.004(3)   | 0.002(3)   |
| C33 | 0.032(5)   | 0.031(4)   | 0.037(4)   | -0.006(3)  | -0.004(3)  | -0.001(3)  |
| C34 | 0.034(5)   | 0.042(4)   | 0.037(5)   | -0.001(3)  | 0.000(4)   | 0.004(4)   |
| C35 | 0.042(5)   | 0.036(4)   | 0.049(5)   | 0.003(4)   | 0.001(4)   | 0.005(4)   |
| C36 | 0.039(5)   | 0.033(4)   | 0.050(5)   | 0.003(3)   | 0.006(4)   | 0.005(4)   |
| C37 | 0.031(5)   | 0.026(4)   | 0.042(5)   | -0.005(3)  | 0.001(4)   | 0.001(3)   |
| C38 | 0.036(4)   | 0.029(4)   | 0.030(4)   | -0.009(3)  | -0.007(3)  | 0.000(3)   |
| C39 | 0.034(4)   | 0.031(4)   | 0.029(5)   | -0.013(4)  | -0.004(3)  | -0.003(3)  |
| C40 | 0.028(4)   | 0.032(4)   | 0.027(4)   | -0.006(3)  | -0.009(3)  | -0.011(3)  |
| C41 | 0.029(4)   | 0.029(4)   | 0.026(4)   | -0.006(3)  | -0.004(3)  | 0.003(3)   |
| C42 | 0.028(4)   | 0.026(4)   | 0.024(4)   | 0.004(3)   | -0.005(3)  | 0.003(3)   |
| C43 | 0.043(5)   | 0.029(4)   | 0.033(5)   | 0.001(3)   | 0.002(4)   | 0.003(3)   |
| C44 | 0.043(4)   | 0.040(5)   | 0.036(5)   | 0.004(4)   | 0.001(4)   | 0.011(3)   |
| C45 | 0.040(5)   | 0.052(5)   | 0.027(5)   | 0.010(4)   | 0.003(4)   | 0.008(4)   |
| C46 | 0.034(4)   | 0.051(5)   | 0.044(6)   | 0.010(4)   | 0.005(4)   | 0.001(4)   |
| C47 | 0.032(4)   | 0.044(5)   | 0.042(5)   | -0.003(4)  | -0.001(4)  | -0.002(3)  |
| C48 | 0.021(4)   | 0.030(4)   | 0.026(4)   | -0.003(3)  | 0.000(3)   | -0.002(3)  |
| C49 | 0.026(4)   | 0.030(4)   | 0.032(4)   | -0.001(3)  | 0.000(3)   | -0.006(3)  |
| C50 | 0.032(5)   | 0.035(4)   | 0.028(4)   | -0.004(3)  | 0.003(3)   | -0.002(3)  |
| C51 | 0.026(4)   | 0.037(4)   | 0.031(4)   | 0.001(3)   | -0.006(3)  | -0.002(3)  |
| C52 | 0.026(4)   | 0.032(4)   | 0.034(4)   | 0.001(3)   | -0.004(3)  | 0.000(3)   |

|     |            |            |            |              |              |              |
|-----|------------|------------|------------|--------------|--------------|--------------|
| C53 | 0.031(5)   | 0.030(4)   | 0.029(4)   | 0.002(3)     | -0.002(3)    | -0.003(3)    |
| C54 | 0.021(4)   | 0.027(4)   | 0.033(4)   | 0.001(3)     | -0.012(3)    | 0.006(3)     |
| O1  | 0.060(5)   | 0.048(4)   | 0.047(4)   | 0.009(3)     | 0.002(4)     | -0.014(4)    |
| C55 | 0.021(3)   | 0.024(4)   | 0.039(5)   | -0.005(3)    | -0.008(3)    | -0.015(3)    |
| O2  | 0.032(3)   | 0.036(4)   | 0.053(4)   | -0.001(3)    | -0.005(3)    | 0.004(3)     |
| Cl1 | 0.0320(12) | 0.0256(11) | 0.0341(12) | -0.0027(9)   | -0.0083(9)   | -0.0038(9)   |
| Re2 | 0.0239(2)  | 0.0197(2)  | 0.0321(2)  | -0.00183(16) | -0.00311(17) | -0.00326(15) |
| B2  | 0.082(7)   | 0.090(7)   | 0.048(5)   | 0.015(5)     | 0.003(5)     | -0.036(6)    |
| N3  | 0.078(6)   | 0.072(6)   | 0.044(4)   | 0.014(4)     | 0.003(4)     | -0.022(5)    |
| N4  | 0.070(5)   | 0.064(5)   | 0.052(4)   | 0.012(4)     | 0.004(4)     | -0.024(4)    |
| C56 | 0.091(8)   | 0.085(8)   | 0.046(5)   | 0.012(4)     | -0.001(4)    | -0.024(6)    |
| C57 | 0.094(8)   | 0.082(7)   | 0.050(5)   | 0.004(4)     | 0.003(4)     | -0.024(6)    |
| C58 | 0.073(6)   | 0.056(6)   | 0.052(5)   | 0.001(4)     | 0.005(4)     | -0.006(5)    |
| C59 | 0.070(6)   | 0.055(6)   | 0.042(4)   | 0.005(3)     | 0.009(4)     | -0.009(5)    |
| C60 | 0.065(5)   | 0.053(5)   | 0.038(4)   | 0.005(4)     | 0.008(4)     | -0.011(4)    |
| C61 | 0.069(6)   | 0.052(6)   | 0.047(4)   | 0.004(4)     | 0.008(4)     | -0.016(5)    |
| C62 | 0.080(7)   | 0.061(7)   | 0.047(5)   | 0.001(4)     | 0.002(4)     | -0.014(5)    |
| C63 | 0.095(7)   | 0.067(7)   | 0.063(5)   | 0.005(5)     | -0.003(5)    | -0.029(6)    |
| C64 | 0.086(7)   | 0.077(8)   | 0.062(5)   | 0.009(5)     | -0.002(5)    | -0.031(6)    |
| C65 | 0.117(13)  | 0.130(13)  | 0.050(6)   | 0.022(7)     | -0.005(7)    | -0.048(11)   |
| C66 | 0.135(11)  | 0.115(11)  | 0.058(7)   | -0.002(7)    | -0.010(7)    | -0.048(9)    |
| C67 | 0.23(3)    | 0.177(16)  | 0.144(18)  | -0.064(15)   | -0.034(18)   | 0.010(17)    |
| C68 | 0.088(9)   | 0.070(8)   | 0.060(8)   | 0.001(6)     | 0.003(7)     | -0.022(7)    |
| C69 | 0.103(10)  | 0.055(7)   | 0.050(6)   | 0.000(5)     | 0.004(6)     | -0.017(7)    |
| C70 | 0.109(9)   | 0.107(10)  | 0.074(8)   | -0.006(7)    | -0.006(7)    | -0.049(8)    |
| C71 | 0.115(11)  | 0.147(15)  | 0.071(10)  | -0.009(10)   | -0.007(8)    | -0.027(9)    |
| C72 | 0.089(9)   | 0.099(10)  | 0.073(9)   | 0.017(8)     | -0.007(7)    | -0.043(8)    |
| C73 | 0.058(5)   | 0.041(5)   | 0.038(5)   | -0.001(4)    | 0.007(4)     | -0.006(4)    |
| C74 | 0.058(5)   | 0.041(5)   | 0.043(5)   | 0.002(4)     | 0.004(4)     | -0.003(4)    |
| C75 | 0.040(5)   | 0.038(5)   | 0.039(5)   | 0.001(4)     | 0.000(4)     | -0.005(4)    |
| C76 | 0.037(4)   | 0.032(4)   | 0.035(4)   | -0.002(3)    | -0.003(3)    | -0.009(3)    |
| C77 | 0.043(5)   | 0.046(5)   | 0.042(5)   | 0.005(4)     | 0.003(4)     | -0.002(4)    |

|      |            |            |            |            |             |            |
|------|------------|------------|------------|------------|-------------|------------|
| C78  | 0.044(5)   | 0.047(5)   | 0.047(5)   | 0.003(4)   | 0.010(4)    | -0.003(4)  |
| C79  | 0.119(12)  | 0.092(7)   | 0.087(10)  | 0.027(6)   | -0.018(9)   | -0.035(7)  |
| C80  | 0.097(9)   | 0.134(12)  | 0.057(8)   | 0.017(7)   | 0.009(7)    | -0.019(8)  |
| P4   | 0.0239(11) | 0.0191(11) | 0.0319(12) | -0.0017(9) | -0.0032(9)  | -0.0033(8) |
| P5   | 0.0294(12) | 0.0268(12) | 0.0309(12) | -0.0030(9) | -0.0020(10) | -0.0022(9) |
| P6   | 0.0264(12) | 0.0246(11) | 0.0289(12) | -0.0025(9) | -0.0012(9)  | -0.0009(9) |
| C81  | 0.029(4)   | 0.025(3)   | 0.030(5)   | 0.001(3)   | -0.002(3)   | 0.004(3)   |
| C82  | 0.029(4)   | 0.030(4)   | 0.054(6)   | -0.002(4)  | -0.006(4)   | 0.001(3)   |
| C83  | 0.034(4)   | 0.036(4)   | 0.061(7)   | -0.002(4)  | -0.004(4)   | 0.007(3)   |
| C84  | 0.034(4)   | 0.035(4)   | 0.045(6)   | 0.001(4)   | -0.004(4)   | 0.005(3)   |
| C85  | 0.038(4)   | 0.030(4)   | 0.035(5)   | -0.001(4)  | -0.003(4)   | 0.002(3)   |
| C86  | 0.036(4)   | 0.026(4)   | 0.029(5)   | 0.000(3)   | -0.001(4)   | 0.001(3)   |
| C87  | 0.014(4)   | 0.025(3)   | 0.038(4)   | 0.001(3)   | -0.008(3)   | -0.005(3)  |
| C88  | 0.025(5)   | 0.025(4)   | 0.051(5)   | -0.001(3)  | -0.008(4)   | -0.004(3)  |
| C89  | 0.028(5)   | 0.026(4)   | 0.053(4)   | 0.006(3)   | -0.009(4)   | -0.002(3)  |
| C90  | 0.023(5)   | 0.036(4)   | 0.050(5)   | 0.009(3)   | -0.004(4)   | 0.006(3)   |
| C91  | 0.028(5)   | 0.041(4)   | 0.044(5)   | 0.005(3)   | 0.001(4)    | 0.004(4)   |
| C92  | 0.023(4)   | 0.034(4)   | 0.036(4)   | 0.002(3)   | -0.008(3)   | 0.001(3)   |
| C93  | 0.024(4)   | 0.032(4)   | 0.036(4)   | -0.001(3)  | -0.008(3)   | -0.005(3)  |
| C94  | 0.032(4)   | 0.030(4)   | 0.029(4)   | -0.009(3)  | -0.006(3)   | -0.011(3)  |
| C95  | 0.039(5)   | 0.030(4)   | 0.031(4)   | -0.002(3)  | 0.001(3)    | 0.000(4)   |
| C96  | 0.022(4)   | 0.023(4)   | 0.031(4)   | -0.004(3)  | -0.007(3)   | -0.001(3)  |
| C97  | 0.032(5)   | 0.030(4)   | 0.031(4)   | 0.000(3)   | -0.003(3)   | 0.001(3)   |
| C98  | 0.029(5)   | 0.031(4)   | 0.033(4)   | -0.004(3)  | -0.008(3)   | -0.005(3)  |
| C99  | 0.031(5)   | 0.039(5)   | 0.036(4)   | 0.003(3)   | -0.002(4)   | -0.005(4)  |
| C100 | 0.030(5)   | 0.048(4)   | 0.037(5)   | -0.001(3)  | 0.000(4)    | -0.005(4)  |
| C101 | 0.032(5)   | 0.047(4)   | 0.036(4)   | -0.005(3)  | -0.002(4)   | 0.000(4)   |
| C102 | 0.027(5)   | 0.034(4)   | 0.036(4)   | -0.007(3)  | -0.008(3)   | 0.000(3)   |
| C103 | 0.029(4)   | 0.030(4)   | 0.035(5)   | 0.004(3)   | -0.004(3)   | -0.002(3)  |
| C104 | 0.030(4)   | 0.034(4)   | 0.047(5)   | -0.005(4)  | -0.003(4)   | -0.003(3)  |
| C105 | 0.032(4)   | 0.034(5)   | 0.063(6)   | -0.001(4)  | -0.010(4)   | -0.007(3)  |
| C106 | 0.032(5)   | 0.035(5)   | 0.067(6)   | 0.005(4)   | -0.014(4)   | -0.003(3)  |

|      |            |            |            |            |             |            |
|------|------------|------------|------------|------------|-------------|------------|
| C107 | 0.030(4)   | 0.038(5)   | 0.066(6)   | 0.003(4)   | -0.004(4)   | 0.004(3)   |
| C108 | 0.030(4)   | 0.031(4)   | 0.045(5)   | -0.001(4)  | -0.004(4)   | -0.003(3)  |
| C109 | 0.026(4)   | 0.017(4)   | 0.043(4)   | -0.002(3)  | -0.001(3)   | -0.006(3)  |
| O3   | 0.065(5)   | 0.023(3)   | 0.045(4)   | 0.004(3)   | -0.001(3)   | -0.006(3)  |
| C110 | 0.021(3)   | 0.037(5)   | 0.016(4)   | -0.007(3)  | -0.004(3)   | -0.015(3)  |
| O4   | 0.024(3)   | 0.059(5)   | 0.057(5)   | 0.006(4)   | -0.001(3)   | -0.015(3)  |
| Cl2  | 0.0389(13) | 0.0221(11) | 0.0396(13) | -0.0084(9) | -0.0073(10) | -0.0019(9) |
| O5   | 0.099(7)   | 0.104(8)   | 0.113(8)   | -0.012(6)  | -0.030(6)   | -0.031(6)  |
| C111 | 0.102(9)   | 0.142(13)  | 0.153(13)  | -0.052(11) | -0.040(8)   | -0.009(8)  |
| C112 | 0.101(9)   | 0.122(12)  | 0.160(14)  | -0.045(11) | -0.050(9)   | 0.007(8)   |
| C113 | 0.108(10)  | 0.113(11)  | 0.147(13)  | -0.044(10) | -0.053(9)   | 0.011(8)   |
| C114 | 0.103(9)   | 0.115(11)  | 0.106(11)  | -0.009(8)  | -0.038(7)   | -0.006(7)  |
| O6   | 0.180(15)  | 0.140(12)  | 0.115(10)  | 0.000(8)   | -0.004(9)   | 0.034(10)  |
| C115 | 0.197(16)  | 0.174(17)  | 0.127(12)  | 0.003(12)  | -0.004(11)  | -0.001(13) |
| C116 | 0.22(2)    | 0.23(2)    | 0.117(12)  | 0.030(12)  | -0.008(11)  | -0.046(16) |
| C117 | 0.24(2)    | 0.29(2)    | 0.115(12)  | 0.033(12)  | -0.018(12)  | -0.080(17) |
| C118 | 0.222(19)  | 0.222(18)  | 0.111(12)  | 0.013(11)  | -0.001(11)  | -0.040(15) |
| O7   | 0.39(4)    | 0.40(3)    | 0.36(3)    | 0.04(3)    | 0.00(3)     | 0.02(3)    |
| C119 | 0.39(4)    | 0.41(4)    | 0.37(3)    | 0.04(3)    | 0.00(3)     | 0.02(3)    |
| C120 | 0.38(4)    | 0.40(4)    | 0.38(4)    | 0.04(3)    | -0.01(3)    | 0.03(3)    |
| C121 | 0.40(4)    | 0.42(4)    | 0.37(3)    | 0.05(3)    | -0.01(3)    | 0.01(3)    |
| C122 | 0.40(4)    | 0.42(4)    | 0.36(3)    | 0.04(3)    | -0.01(3)    | 0.01(3)    |
| O8   | 0.77(5)    | 0.37(3)    | 0.70(5)    | -0.12(4)   | 0.04(4)     | -0.06(4)   |
| C123 | 0.78(5)    | 0.38(3)    | 0.70(5)    | -0.11(4)   | 0.04(4)     | -0.05(4)   |
| C124 | 0.78(5)    | 0.36(3)    | 0.69(5)    | -0.11(4)   | 0.04(4)     | -0.07(4)   |
| C125 | 0.77(5)    | 0.31(3)    | 0.69(5)    | -0.10(4)   | 0.04(4)     | -0.08(4)   |
| C126 | 0.77(5)    | 0.33(3)    | 0.69(5)    | -0.11(4)   | 0.04(4)     | -0.07(4)   |

**Table 3c:6.** Hydrogen coordinates and isotropic displacement parameters ( $\text{\AA}^2$ ) for ljh102 (3c).

|      | x      | y      | z      | U     |
|------|--------|--------|--------|-------|
| H10A | 0.3567 | 0.8328 | 1.0057 | 0.119 |
| H10B | 0.4716 | 0.7884 | 0.9950 | 0.119 |
| H10C | 0.4696 | 0.8858 | 1.0042 | 0.119 |
| H11A | 0.2040 | 0.8301 | 0.9730 | 0.081 |
| H11B | 0.1452 | 0.8469 | 0.9296 | 0.081 |
| H12A | 0.0738 | 0.9411 | 0.9746 | 0.115 |
| H12B | 0.1955 | 0.9774 | 0.9806 | 0.115 |
| H12C | 0.1366 | 0.9942 | 0.9371 | 0.115 |
| H13A | 0.2727 | 0.9484 | 0.8296 | 0.085 |
| H13B | 0.1921 | 0.8812 | 0.8546 | 0.085 |
| H13C | 0.1937 | 0.9778 | 0.8651 | 0.085 |
| H14A | 0.6128 | 0.9619 | 0.7658 | 0.079 |
| H14B | 0.7302 | 1.0088 | 0.7613 | 0.079 |
| H14C | 0.7226 | 0.9091 | 0.7570 | 0.079 |
| H15A | 0.9771 | 0.8930 | 0.8287 | 0.088 |
| H15B | 0.9198 | 0.9198 | 0.7856 | 0.088 |
| H16A | 1.0464 | 1.0234 | 0.8000 | 0.122 |
| H16B | 0.9240 | 1.0630 | 0.7987 | 0.122 |
| H16C | 0.9813 | 1.0362 | 0.8418 | 0.122 |
| H17A | 0.9531 | 0.8976 | 0.8956 | 0.109 |
| H17B | 0.8723 | 0.9358 | 0.9283 | 0.109 |
| H17C | 0.8713 | 0.8361 | 0.9235 | 0.109 |
| H19  | 0.4354 | 0.8402 | 0.7895 | 0.051 |
| H20  | 0.3342 | 0.8828 | 0.7307 | 0.042 |
| H22  | 0.3630 | 1.1269 | 0.7550 | 0.045 |
| H23  | 0.4555 | 1.0841 | 0.8145 | 0.051 |
| H24A | 0.7425 | 0.7977 | 0.9561 | 0.139 |
| H24B | 0.6216 | 0.7833 | 0.9762 | 0.139 |
| H24C | 0.6485 | 0.7526 | 0.9321 | 0.139 |

|      |         |        |        |       |
|------|---------|--------|--------|-------|
| H25A | 0.7273  | 0.9656 | 0.9613 | 0.136 |
| H25B | 0.6257  | 1.0173 | 0.9399 | 0.136 |
| H25C | 0.6054  | 0.9559 | 0.9812 | 0.136 |
| H27  | -0.0671 | 0.8723 | 0.6436 | 0.056 |
| H28  | -0.2461 | 0.8141 | 0.6436 | 0.071 |
| H29  | -0.3998 | 0.8927 | 0.6593 | 0.066 |
| H30  | -0.3772 | 1.0303 | 0.6779 | 0.057 |
| H31  | -0.2031 | 1.0912 | 0.6751 | 0.047 |
| H33C | -0.0831 | 1.0541 | 0.5761 | 0.040 |
| H34  | -0.1236 | 1.1625 | 0.5250 | 0.045 |
| H35  | -0.0739 | 1.3011 | 0.5325 | 0.051 |
| H36  | 0.0132  | 1.3338 | 0.5916 | 0.050 |
| H37  | 0.0515  | 1.2264 | 0.6445 | 0.039 |
| H38A | -0.0177 | 1.1351 | 0.7033 | 0.037 |
| H38B | 0.0133  | 1.0435 | 0.7256 | 0.037 |
| H39A | 0.1633  | 1.1214 | 0.7393 | 0.037 |
| H39B | 0.1626  | 1.1750 | 0.6952 | 0.037 |
| H40A | 0.3721  | 1.1662 | 0.6796 | 0.035 |
| H40B | 0.4308  | 1.0876 | 0.6604 | 0.035 |
| H41A | 0.3677  | 1.1832 | 0.6049 | 0.033 |
| H41B | 0.2453  | 1.1840 | 0.6247 | 0.033 |
| H43  | 0.3423  | 0.9111 | 0.5580 | 0.043 |
| H44  | 0.5054  | 0.8586 | 0.5316 | 0.049 |
| H45  | 0.6697  | 0.9327 | 0.5334 | 0.049 |
| H46  | 0.6722  | 1.0648 | 0.5606 | 0.053 |
| H47  | 0.5066  | 1.1178 | 0.5859 | 0.047 |
| H49  | 0.1503  | 0.9894 | 0.5322 | 0.036 |
| H50  | 0.0676  | 1.0455 | 0.4706 | 0.038 |
| H51  | 0.0824  | 1.1900 | 0.4485 | 0.037 |
| H52  | 0.1690  | 1.2803 | 0.4901 | 0.037 |
| H53  | 0.2513  | 1.2255 | 0.5507 | 0.036 |
| H65A | 0.0651  | 0.3035 | 1.0119 | 0.152 |
| H65B | -0.0593 | 0.2901 | 0.9975 | 0.152 |

|      |         |        |        |       |
|------|---------|--------|--------|-------|
| H65C | 0.0328  | 0.2188 | 0.9920 | 0.152 |
| H66A | 0.2772  | 0.4331 | 0.9612 | 0.123 |
| H66B | 0.2190  | 0.3688 | 0.9959 | 0.123 |
| H67A | 0.2004  | 0.5098 | 1.0130 | 0.271 |
| H67B | 0.1385  | 0.5361 | 0.9707 | 0.271 |
| H67C | 0.0804  | 0.4720 | 1.0054 | 0.271 |
| H68A | 0.1951  | 0.4842 | 0.8511 | 0.110 |
| H68B | 0.1910  | 0.5313 | 0.8920 | 0.110 |
| H68C | 0.2849  | 0.4616 | 0.8860 | 0.110 |
| H69A | 0.0013  | 0.3558 | 0.7523 | 0.105 |
| H69B | -0.0377 | 0.2695 | 0.7354 | 0.105 |
| H69C | -0.1213 | 0.3485 | 0.7350 | 0.105 |
| H70A | -0.2171 | 0.1854 | 0.7439 | 0.116 |
| H70B | -0.2872 | 0.1362 | 0.7806 | 0.116 |
| H71A | -0.4062 | 0.2190 | 0.7366 | 0.167 |
| H71B | -0.4091 | 0.2537 | 0.7808 | 0.167 |
| H71C | -0.3390 | 0.3029 | 0.7440 | 0.167 |
| H72A | -0.3306 | 0.1283 | 0.8434 | 0.133 |
| H72B | -0.2424 | 0.1013 | 0.8784 | 0.133 |
| H72C | -0.3271 | 0.1778 | 0.8836 | 0.133 |
| H74  | 0.2248  | 0.3350 | 0.8134 | 0.057 |
| H75  | 0.3221  | 0.4117 | 0.7600 | 0.047 |
| H77  | 0.0571  | 0.5704 | 0.7412 | 0.053 |
| H78  | -0.0338 | 0.4971 | 0.7967 | 0.056 |
| H79A | -0.0496 | 0.1435 | 0.9533 | 0.152 |
| H79B | -0.1255 | 0.1104 | 0.9186 | 0.152 |
| H79C | 0.0021  | 0.1328 | 0.9089 | 0.152 |
| H80A | -0.1922 | 0.2748 | 0.9631 | 0.147 |
| H80B | -0.2215 | 0.3389 | 0.9238 | 0.147 |
| H80C | -0.2724 | 0.2451 | 0.9289 | 0.147 |
| H82  | 0.7069  | 0.4779 | 0.6450 | 0.045 |
| H83  | 0.8416  | 0.3710 | 0.6434 | 0.053 |
| H84  | 0.7875  | 0.2312 | 0.6405 | 0.046 |



|      |         |        |        |       |
|------|---------|--------|--------|-------|
| H85  | 0.5999  | 0.1970 | 0.6370 | 0.042 |
| H86  | 0.4654  | 0.3033 | 0.6379 | 0.037 |
| H88  | 0.5542  | 0.6606 | 0.6431 | 0.040 |
| H89  | 0.6112  | 0.7623 | 0.5900 | 0.044 |
| H90  | 0.6156  | 0.7304 | 0.5234 | 0.045 |
| H91  | 0.5614  | 0.5959 | 0.5074 | 0.046 |
| H92  | 0.4973  | 0.4944 | 0.5594 | 0.037 |
| H93A | 0.5051  | 0.4683 | 0.7150 | 0.037 |
| H93B | 0.5687  | 0.5501 | 0.6938 | 0.037 |
| H94A | 0.4185  | 0.6354 | 0.6977 | 0.036 |
| H94B | 0.4106  | 0.5758 | 0.7402 | 0.036 |
| H95A | 0.1108  | 0.6298 | 0.6800 | 0.040 |
| H95B | 0.2084  | 0.6829 | 0.6981 | 0.040 |
| H96A | 0.3073  | 0.6895 | 0.6362 | 0.030 |
| H96B | 0.1831  | 0.7206 | 0.6257 | 0.030 |
| H98  | 0.2881  | 0.7515 | 0.5657 | 0.037 |
| H99  | 0.3446  | 0.8083 | 0.5004 | 0.043 |
| H100 | 0.3632  | 0.7175 | 0.4478 | 0.047 |
| H101 | 0.3185  | 0.5745 | 0.4610 | 0.046 |
| H102 | 0.2631  | 0.5189 | 0.5253 | 0.039 |
| H104 | 0.0822  | 0.4769 | 0.5602 | 0.044 |
| H105 | -0.1040 | 0.4669 | 0.5437 | 0.052 |
| H106 | -0.2333 | 0.5645 | 0.5650 | 0.054 |
| H107 | -0.1745 | 0.6713 | 0.6042 | 0.054 |
| H108 | 0.0136  | 0.6869 | 0.6171 | 0.043 |
| H11C | 0.8596  | 0.6512 | 0.6838 | 0.155 |
| H11D | 0.8230  | 0.5743 | 0.7170 | 0.155 |
| H11E | 0.8813  | 0.6437 | 0.7678 | 0.150 |
| H11F | 0.9321  | 0.7145 | 0.7342 | 0.150 |
| H11G | 0.7985  | 0.7999 | 0.7414 | 0.144 |
| H11H | 0.7733  | 0.7421 | 0.7836 | 0.144 |
| H11I | 0.6253  | 0.6789 | 0.7573 | 0.129 |
| H11J | 0.6257  | 0.7614 | 0.7241 | 0.129 |

|      |         |        |        |       |
|------|---------|--------|--------|-------|
| H11K | 0.2488  | 1.1153 | 0.8717 | 0.201 |
| H11L | 0.1986  | 1.2070 | 0.8794 | 0.201 |
| H11M | 0.2742  | 1.1866 | 0.9413 | 0.231 |
| H11N | 0.3487  | 1.1087 | 0.9285 | 0.231 |
| H11O | 0.4867  | 1.1883 | 0.9215 | 0.261 |
| H11P | 0.4121  | 1.2663 | 0.9341 | 0.261 |
| H11Q | 0.3971  | 1.3208 | 0.8692 | 0.225 |
| H11R | 0.4959  | 1.2571 | 0.8591 | 0.225 |
| H11S | -0.3278 | 0.5290 | 0.7705 | 0.473 |
| H11T | -0.2774 | 0.4349 | 0.7813 | 0.473 |
| H12D | -0.1705 | 0.5071 | 0.8242 | 0.472 |
| H12E | -0.2675 | 0.5749 | 0.8310 | 0.472 |
| H12F | -0.3041 | 0.4984 | 0.8860 | 0.486 |
| H12G | -0.2310 | 0.4205 | 0.8723 | 0.486 |
| H12H | -0.3827 | 0.3564 | 0.8517 | 0.480 |
| H12I | -0.4565 | 0.4283 | 0.8708 | 0.480 |
| H12J | 0.4195  | 0.6905 | 0.9112 | 0.737 |
| H12K | 0.3926  | 0.5970 | 0.8985 | 0.737 |
| H12L | 0.2313  | 0.6600 | 0.8755 | 0.727 |
| H12M | 0.2857  | 0.7531 | 0.8698 | 0.727 |
| H12N | 0.2948  | 0.7374 | 0.8065 | 0.705 |
| H12O | 0.2724  | 0.6369 | 0.8147 | 0.705 |
| H12P | 0.4536  | 0.6116 | 0.8074 | 0.713 |
| H12Q | 0.4760  | 0.7120 | 0.7992 | 0.713 |

5.4 Crystallographic data for *fac*-[Re(CO)<sub>3</sub>(triphos-Ph)][OTf] (4)

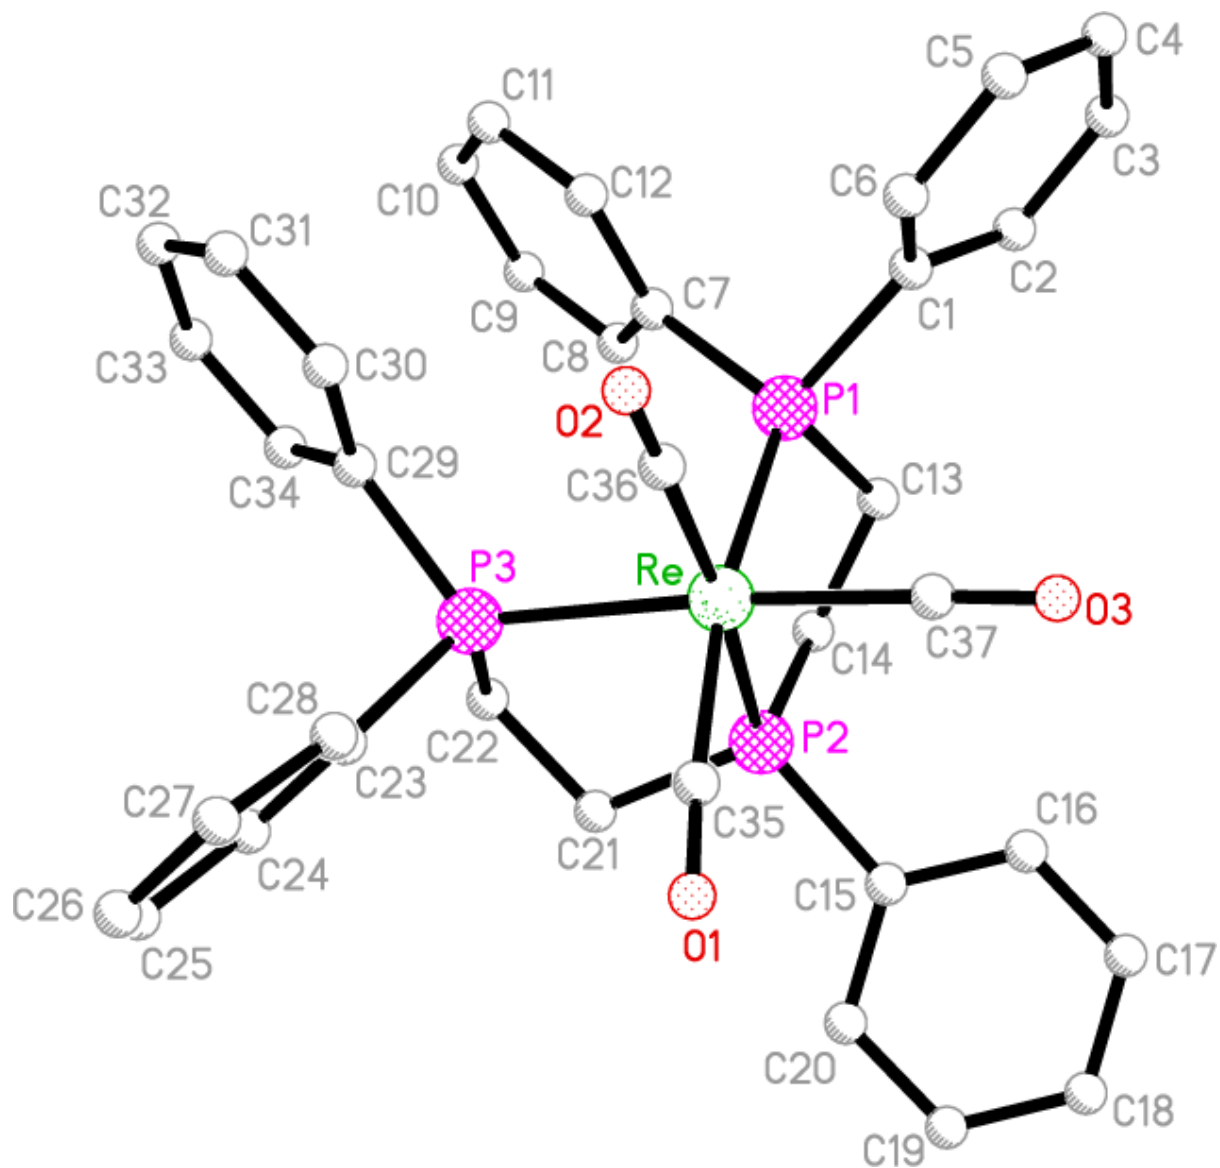

**Table 4:1.** Crystal data and structure refinement for ljh120152 (4).

|                                       |                                                       |                             |
|---------------------------------------|-------------------------------------------------------|-----------------------------|
| Identification code                   | ljh120152 (4)                                         |                             |
| Chemical formula (moiety)             | $C_{37}H_{33}O_3P_3Re^+ \cdot CF_3O_3S^-$             |                             |
| Chemical formula (total)              | $C_{38}H_{33}F_3O_6P_3ReS$                            |                             |
| Formula weight                        | 953.81                                                |                             |
| Temperature                           | 150(2) K                                              |                             |
| Radiation, wavelength                 | MoK $\alpha$ , 0.71073 Å                              |                             |
| Crystal system, space group           | triclinic, $P\bar{1}$                                 |                             |
| Unit cell parameters                  | $a = 10.1353(3)$ Å                                    | $\alpha = 97.774(4)^\circ$  |
|                                       | $b = 11.9377(5)$ Å                                    | $\beta = 96.016(3)^\circ$   |
|                                       | $c = 16.5611(8)$ Å                                    | $\gamma = 112.238(4)^\circ$ |
| Cell volume                           | 1810.90(14) Å <sup>3</sup>                            |                             |
| Z                                     | 2                                                     |                             |
| Calculated density                    | 1.749 g/cm <sup>3</sup>                               |                             |
| Absorption coefficient $\mu$          | 3.608 mm <sup>-1</sup>                                |                             |
| F(000)                                | 944                                                   |                             |
| Crystal colour and size               | colourless, 0.42 × 0.12 × 0.10 mm <sup>3</sup>        |                             |
| Reflections for cell refinement       | 6521 ( $\theta$ range 3.4 to 28.5°)                   |                             |
| Data collection method                | Agilent Technologies Gemini A Ultra<br>$\omega$ scans |                             |
| $\theta$ range for data collection    | 3.4 to 28.5°                                          |                             |
| Index ranges                          | h -11 to 12, k -14 to 12, l -15 to 20                 |                             |
| Completeness to $\theta = 25.2^\circ$ | 99.6 %                                                |                             |
| Reflections collected                 | 15057                                                 |                             |
| Independent reflections               | 7542 ( $R_{int} = 0.0438$ )                           |                             |
| Reflections with $F^2 > 2\sigma$      | 6893                                                  |                             |
| Absorption correction                 | multi-scan                                            |                             |
| Min. and max. transmission            | 0.310 and 0.715                                       |                             |
| Structure solution                    | direct methods                                        |                             |
| Refinement method                     | Full-matrix least-squares on $F^2$                    |                             |
| Weighting parameters a, b             | 0.0341, 5.7731                                        |                             |
| Data / restraints / parameters        | 7542 / 339 / 525                                      |                             |

|                                     |                                             |
|-------------------------------------|---------------------------------------------|
| Final R indices [ $F^2 > 2\sigma$ ] | R1 = 0.0376, wR2 = 0.0874                   |
| R indices (all data)                | R1 = 0.0428, wR2 = 0.0924                   |
| Goodness-of-fit on $F^2$            | 1.052                                       |
| Extinction coefficient              | 0.0008(3)                                   |
| Largest and mean shift/su           | 0.002 and 0.000                             |
| Largest diff. peak and hole         | 1.79 and $-1.88 \text{ e } \text{\AA}^{-3}$ |

**Table 4:2.** Atomic coordinates and equivalent isotropic displacement parameters ( $\text{\AA}^2$ ) for ljh120152 (4).  $U_{\text{eq}}$  is defined as one third of the trace of the orthogonalised  $U^{\text{ij}}$  tensor.

|     | x           | y           | z          | $U_{\text{eq}}$ |
|-----|-------------|-------------|------------|-----------------|
| Re  | 0.71965(2)  | 0.52009(2)  | 0.31539(2) | 0.01709(8)      |
| P1  | 0.50618(13) | 0.54680(11) | 0.24962(8) | 0.0200(3)       |
| P2  | 0.75272(13) | 0.48298(11) | 0.17240(8) | 0.0204(3)       |
| P3  | 0.60582(13) | 0.29283(11) | 0.28611(8) | 0.0176(2)       |
| C1  | 0.4730(5)   | 0.6788(5)   | 0.2976(4)  | 0.0261(11)      |
| C2  | 0.4322(7)   | 0.7487(6)   | 0.2470(4)  | 0.0430(16)      |
| C3  | 0.3978(8)   | 0.8442(6)   | 0.2822(5)  | 0.0537(19)      |
| C4  | 0.4070(7)   | 0.8722(5)   | 0.3670(4)  | 0.0382(14)      |
| C5  | 0.4535(8)   | 0.8070(6)   | 0.4156(4)  | 0.0465(16)      |
| C6  | 0.4865(7)   | 0.7103(6)   | 0.3804(4)  | 0.0376(14)      |
| C7  | 0.3255(5)   | 0.4223(4)   | 0.2291(3)  | 0.0217(10)      |
| C8  | 0.2640(5)   | 0.3498(5)   | 0.1509(4)  | 0.0274(11)      |
| C9  | 0.1279(6)   | 0.2556(5)   | 0.1379(4)  | 0.0315(12)      |
| C10 | 0.0518(6)   | 0.2323(5)   | 0.2030(4)  | 0.0302(12)      |
| C11 | 0.1113(6)   | 0.3058(5)   | 0.2798(4)  | 0.0310(12)      |
| C12 | 0.2478(6)   | 0.3997(5)   | 0.2933(3)  | 0.0279(11)      |
| C13 | 0.5456(5)   | 0.5816(5)   | 0.1480(3)  | 0.0246(11)      |
| C14 | 0.6102(5)   | 0.5001(5)   | 0.1031(3)  | 0.0245(11)      |
| C15 | 0.9180(5)   | 0.5735(5)   | 0.1384(3)  | 0.0245(11)      |
| C16 | 0.9402(6)   | 0.6917(5)   | 0.1278(4)  | 0.0339(13)      |
| C17 | 1.0619(7)   | 0.7628(6)   | 0.0983(4)  | 0.0400(15)      |
| C18 | 1.1626(6)   | 0.7163(6)   | 0.0806(4)  | 0.0399(15)      |
| C19 | 1.1418(7)   | 0.5987(7)   | 0.0909(5)  | 0.0491(17)      |
| C20 | 1.0195(6)   | 0.5265(6)   | 0.1205(4)  | 0.0382(14)      |
| C21 | 0.7223(6)   | 0.3203(4)   | 0.1427(3)  | 0.0250(11)      |
| C22 | 0.5892(5)   | 0.2423(4)   | 0.1746(3)  | 0.0230(10)      |
| C23 | 0.7107(5)   | 0.2184(4)   | 0.3369(3)  | 0.0208(10)      |
| C24 | 0.7175(5)   | 0.1116(5)   | 0.2973(4)  | 0.0266(11)      |
| C25 | 0.7865(6)   | 0.0502(5)   | 0.3400(4)  | 0.0340(13)      |

|     |            |            |              |            |
|-----|------------|------------|--------------|------------|
| C26 | 0.8456(6)  | 0.0948(6)  | 0.4224(4)    | 0.0354(13) |
| C27 | 0.8390(6)  | 0.2007(6)  | 0.4622(4)    | 0.0347(13) |
| C28 | 0.7740(6)  | 0.2637(5)  | 0.4192(4)    | 0.0316(12) |
| C29 | 0.4277(5)  | 0.2079(4)  | 0.3110(3)    | 0.0213(10) |
| C30 | 0.4027(6)  | 0.2343(5)  | 0.3905(4)    | 0.0289(12) |
| C31 | 0.2770(6)  | 0.1649(5)  | 0.4149(4)    | 0.0335(13) |
| C32 | 0.1719(6)  | 0.0671(5)  | 0.3595(4)    | 0.0325(13) |
| C33 | 0.1931(6)  | 0.0405(5)  | 0.2806(4)    | 0.0343(13) |
| C34 | 0.3201(5)  | 0.1097(5)  | 0.2552(4)    | 0.0280(12) |
| C35 | 0.9072(5)  | 0.5160(4)  | 0.3529(3)    | 0.0251(11) |
| O1  | 1.0206(4)  | 0.5223(4)  | 0.3758(3)    | 0.0429(11) |
| C36 | 0.6787(5)  | 0.5314(4)  | 0.4292(4)    | 0.0233(11) |
| O2  | 0.6610(5)  | 0.5385(4)  | 0.4949(3)    | 0.0368(9)  |
| C37 | 0.8185(5)  | 0.6990(5)  | 0.3297(3)    | 0.0276(12) |
| O3  | 0.8787(4)  | 0.8019(3)  | 0.3388(3)    | 0.0463(12) |
| C38 | 0.2658(7)  | 0.0235(7)  | -0.0240(4)   | 0.0603(17) |
| S   | 0.3575(3)  | 0.1357(2)  | -0.07082(15) | 0.0810(7)  |
| F1  | 0.2956(15) | 0.0424(14) | 0.0554(5)    | 0.089(5)   |
| F2  | 0.1204(9)  | 0.0082(13) | -0.0358(10)  | 0.110(5)   |
| F3  | 0.2557(19) | -0.0856(9) | -0.0576(10)  | 0.076(5)   |
| O4  | 0.4990(10) | 0.1480(17) | -0.0615(10)  | 0.105(5)   |
| O5  | 0.3408(15) | 0.2456(7)  | -0.0164(6)   | 0.065(3)   |
| O6  | 0.2651(12) | 0.1089(10) | -0.1504(6)   | 0.045(3)   |
| F1' | 0.3473(14) | 0.0178(11) | 0.0472(6)    | 0.076(4)   |
| F2' | 0.1521(14) | 0.0288(12) | 0.0044(10)   | 0.098(4)   |
| F3' | 0.2226(15) | -0.0902(7) | -0.0668(8)   | 0.050(3)   |
| O4' | 0.4624(10) | 0.0732(11) | -0.1054(8)   | 0.071(3)   |
| O5' | 0.4462(17) | 0.2404(8)  | -0.0171(6)   | 0.099(5)   |
| O6' | 0.2469(17) | 0.1223(16) | -0.1382(8)   | 0.121(7)   |

**Table 4:3.** Bond lengths [Å] and angles [°] for ljh120152 (4).

|          |            |          |            |
|----------|------------|----------|------------|
| Re–P1    | 2.4680(12) | Re–P2    | 2.4313(13) |
| Re–P3    | 2.4666(12) | Re–C35   | 1.957(5)   |
| Re–C36   | 1.971(6)   | Re–C37   | 1.954(6)   |
| P1–C1    | 1.829(5)   | P1–C7    | 1.831(5)   |
| P1–C13   | 1.835(5)   | P2–C14   | 1.840(5)   |
| P2–C15   | 1.812(5)   | P2–C21   | 1.834(5)   |
| P3–C22   | 1.833(5)   | P3–C23   | 1.831(5)   |
| P3–C29   | 1.828(5)   | C1–C2    | 1.395(8)   |
| C1–C6    | 1.351(8)   | C2–H2    | 0.950      |
| C2–C3    | 1.387(9)   | C3–H3    | 0.950      |
| C3–C4    | 1.384(10)  | C4–H4    | 0.950      |
| C4–C5    | 1.358(9)   | C5–H5    | 0.950      |
| C5–C6    | 1.391(8)   | C6–H6    | 0.950      |
| C7–C8    | 1.390(7)   | C7–C12   | 1.384(7)   |
| C8–H8    | 0.950      | C8–C9    | 1.382(7)   |
| C9–H9    | 0.950      | C9–C10   | 1.389(8)   |
| C10–H10  | 0.950      | C10–C11  | 1.374(8)   |
| C11–H11  | 0.950      | C11–C12  | 1.383(7)   |
| C12–H12  | 0.950      | C13–H13A | 0.990      |
| C13–H13B | 0.990      | C13–C14  | 1.522(7)   |
| C14–H14A | 0.990      | C14–H14B | 0.990      |
| C15–C16  | 1.381(8)   | C15–C20  | 1.384(8)   |
| C16–H16  | 0.950      | C16–C17  | 1.387(8)   |
| C17–H17  | 0.950      | C17–C18  | 1.372(9)   |
| C18–H18  | 0.950      | C18–C19  | 1.375(10)  |
| C19–H19  | 0.950      | C19–C20  | 1.397(9)   |
| C20–H20  | 0.950      | C21–H21A | 0.990      |
| C21–H21B | 0.990      | C21–C22  | 1.515(7)   |
| C22–H22A | 0.990      | C22–H22B | 0.990      |
| C23–C24  | 1.383(7)   | C23–C28  | 1.385(8)   |
| C24–H24  | 0.950      | C24–C25  | 1.397(7)   |
| C25–H25  | 0.950      | C25–C26  | 1.377(9)   |



|            |            |            |            |
|------------|------------|------------|------------|
| C26–H26    | 0.950      | C26–C27    | 1.372(8)   |
| C27–H27    | 0.950      | C27–C28    | 1.389(8)   |
| C28–H28    | 0.950      | C29–C30    | 1.385(8)   |
| C29–C34    | 1.394(7)   | C30–H30    | 0.950      |
| C30–C31    | 1.368(7)   | C31–H31    | 0.950      |
| C31–C32    | 1.380(8)   | C32–H32    | 0.950      |
| C32–C33    | 1.361(9)   | C33–H33    | 0.950      |
| C33–C34    | 1.385(8)   | C34–H34    | 0.950      |
| C35–O1     | 1.143(6)   | C36–O2     | 1.117(7)   |
| C37–O3     | 1.126(6)   | C38–S      | 1.659(9)   |
| C38–F1     | 1.287(10)  | C38–F2     | 1.404(10)  |
| C38–F3     | 1.307(10)  | C38–F1'    | 1.391(10)  |
| C38–F2'    | 1.309(10)  | C38–F3'    | 1.327(9)   |
| S–O4       | 1.375(9)   | S–O5       | 1.562(9)   |
| S–O6       | 1.455(8)   | S–O4'      | 1.622(9)   |
| S–O5'      | 1.358(8)   | S–O6'      | 1.442(9)   |
|            |            |            |            |
| P1–Re–P2   | 81.88(4)   | P1–Re–P3   | 95.12(4)   |
| P1–Re–C35  | 169.49(16) | P1–Re–C36  | 97.48(14)  |
| P1–Re–C37  | 85.76(15)  | P2–Re–P3   | 80.92(4)   |
| P2–Re–C35  | 90.22(16)  | P2–Re–C36  | 173.86(14) |
| P2–Re–C37  | 94.06(17)  | P3–Re–C35  | 90.43(15)  |
| P3–Re–C36  | 93.08(14)  | P3–Re–C37  | 174.70(16) |
| C35–Re–C36 | 91.1(2)    | C35–Re–C37 | 87.9(2)    |
| C36–Re–C37 | 92.0(2)    | Re–P1–C1   | 116.81(17) |
| Re–P1–C7   | 121.69(16) | Re–P1–C13  | 105.25(17) |
| C1–P1–C7   | 102.4(2)   | C1–P1–C13  | 103.4(2)   |
| C7–P1–C13  | 105.4(2)   | Re–P2–C14  | 110.32(17) |
| Re–P2–C15  | 121.59(17) | Re–P2–C21  | 108.37(17) |
| C14–P2–C15 | 103.8(2)   | C14–P2–C21 | 104.1(2)   |
| C15–P2–C21 | 107.3(2)   | Re–P3–C22  | 107.24(16) |
| Re–P3–C23  | 114.67(16) | Re–P3–C29  | 121.87(16) |
| C22–P3–C23 | 106.3(2)   | C22–P3–C29 | 105.3(2)   |
| C23–P3–C29 | 100.2(2)   | P1–C1–C2   | 119.0(4)   |

|               |          |              |          |
|---------------|----------|--------------|----------|
| P1-C1-C6      | 121.9(4) | C2-C1-C6     | 119.1(5) |
| C1-C2-H2      | 120.2    | C1-C2-C3     | 119.5(6) |
| H2-C2-C3      | 120.2    | C2-C3-H3     | 119.8    |
| C2-C3-C4      | 120.5(6) | H3-C3-C4     | 119.8    |
| C3-C4-H4      | 120.4    | C3-C4-C5     | 119.2(6) |
| H4-C4-C5      | 120.4    | C4-C5-H5     | 119.8    |
| C4-C5-C6      | 120.4(6) | H5-C5-C6     | 119.8    |
| C1-C6-C5      | 121.2(6) | C1-C6-H6     | 119.4    |
| C5-C6-H6      | 119.4    | P1-C7-C8     | 122.0(4) |
| P1-C7-C12     | 119.0(4) | C8-C7-C12    | 119.0(5) |
| C7-C8-H8      | 119.8    | C7-C8-C9     | 120.4(5) |
| H8-C8-C9      | 119.8    | C8-C9-H9     | 119.9    |
| C8-C9-C10     | 120.2(5) | H9-C9-C10    | 119.9    |
| C9-C10-H10    | 120.3    | C9-C10-C11   | 119.3(5) |
| H10-C10-C11   | 120.3    | C10-C11-H11  | 119.7    |
| C10-C11-C12   | 120.7(5) | H11-C11-C12  | 119.7    |
| C7-C12-C11    | 120.4(5) | C7-C12-H12   | 119.8    |
| C11-C12-H12   | 119.8    | P1-C13-H13A  | 108.8    |
| P1-C13-H13B   | 108.8    | P1-C13-C14   | 113.7(3) |
| H13A-C13-H13B | 107.7    | H13A-C13-C14 | 108.8    |
| H13B-C13-C14  | 108.8    | P2-C14-C13   | 111.7(4) |
| P2-C14-H14A   | 109.3    | P2-C14-H14B  | 109.3    |
| C13-C14-H14A  | 109.3    | C13-C14-H14B | 109.3    |
| H14A-C14-H14B | 107.9    | P2-C15-C16   | 118.4(4) |
| P2-C15-C20    | 122.1(4) | C16-C15-C20  | 119.5(5) |
| C15-C16-H16   | 119.7    | C15-C16-C17  | 120.6(6) |
| H16-C16-C17   | 119.7    | C16-C17-H17  | 120.0    |
| C16-C17-C18   | 119.9(6) | H17-C17-C18  | 120.0    |
| C17-C18-H18   | 120.0    | C17-C18-C19  | 119.9(6) |
| H18-C18-C19   | 120.0    | C18-C19-H19  | 119.7    |
| C18-C19-C20   | 120.5(6) | H19-C19-C20  | 119.7    |
| C15-C20-C19   | 119.5(6) | C15-C20-H20  | 120.3    |
| C19-C20-H20   | 120.3    | P2-C21-H21A  | 110.0    |
| P2-C21-H21B   | 110.0    | P2-C21-C22   | 108.6(3) |

|               |          |              |           |
|---------------|----------|--------------|-----------|
| H21A-C21-H21B | 108.3    | H21A-C21-C22 | 110.0     |
| H21B-C21-C22  | 110.0    | P3-C22-C21   | 111.0(3)  |
| P3-C22-H22A   | 109.4    | P3-C22-H22B  | 109.4     |
| C21-C22-H22A  | 109.4    | C21-C22-H22B | 109.4     |
| H22A-C22-H22B | 108.0    | P3-C23-C24   | 121.6(4)  |
| P3-C23-C28    | 119.3(4) | C24-C23-C28  | 118.9(5)  |
| C23-C24-H24   | 119.8    | C23-C24-C25  | 120.4(5)  |
| H24-C24-C25   | 119.8    | C24-C25-H25  | 120.1     |
| C24-C25-C26   | 119.9(5) | H25-C25-C26  | 120.1     |
| C25-C26-H26   | 119.9    | C25-C26-C27  | 120.1(5)  |
| H26-C26-C27   | 119.9    | C26-C27-H27  | 120.0     |
| C26-C27-C28   | 120.0(6) | H27-C27-C28  | 120.0     |
| C23-C28-C27   | 120.7(5) | C23-C28-H28  | 119.7     |
| C27-C28-H28   | 119.7    | P3-C29-C30   | 118.9(4)  |
| P3-C29-C34    | 122.5(4) | C30-C29-C34  | 118.4(5)  |
| C29-C30-H30   | 119.4    | C29-C30-C31  | 121.3(5)  |
| H30-C30-C31   | 119.4    | C30-C31-H31  | 120.1     |
| C30-C31-C32   | 119.8(5) | H31-C31-C32  | 120.1     |
| C31-C32-H32   | 120.0    | C31-C32-C33  | 119.9(5)  |
| H32-C32-C33   | 120.0    | C32-C33-H33  | 119.6     |
| C32-C33-C34   | 120.8(5) | H33-C33-C34  | 119.6     |
| C29-C34-C33   | 119.8(5) | C29-C34-H34  | 120.1     |
| C33-C34-H34   | 120.1    | Re-C35-O1    | 175.3(4)  |
| Re-C36-O2     | 177.2(4) | Re-C37-O3    | 178.2(5)  |
| S-C38-F1      | 117.6(7) | S-C38-F2     | 108.4(8)  |
| S-C38-F3      | 114.2(8) | S-C38-F1'    | 113.0(7)  |
| S-C38-F2'     | 117.6(7) | S-C38-F3'    | 115.7(7)  |
| F1-C38-F2     | 101.1(8) | F1-C38-F3    | 111.6(10) |
| F2-C38-F3     | 101.7(9) | F1'-C38-F2'  | 101.3(8)  |
| F1'-C38-F3'   | 101.5(8) | F2'-C38-F3'  | 105.6(9)  |
| C38-S-O4      | 108.4(6) | C38-S-O5     | 98.8(4)   |
| C38-S-O6      | 103.7(5) | C38-S-O4'    | 96.9(4)   |
| C38-S-O5'     | 113.0(5) | C38-S-O6'    | 100.5(7)  |
| O4-S-O5       | 111.6(7) | O4-S-O6      | 124.0(8)  |

O5-S-O6

107.1(6)

O4'-S-O5'

105.6(7)

O4'-S-O6'

108.8(7)

O5'-S-O6'

127.8(8)

**Table 4:4.** Torsion angles [°] for ljh120152 (4).

|                 |           |                 |           |
|-----------------|-----------|-----------------|-----------|
| Re–P1–C1–C2     | 137.3(4)  | Re–P1–C1–C6     | –42.8(5)  |
| C7–P1–C1–C2     | –87.2(5)  | C7–P1–C1–C6     | 92.7(5)   |
| C13–P1–C1–C2    | 22.2(5)   | C13–P1–C1–C6    | –157.9(5) |
| P1–C1–C2–C3     | 175.9(5)  | C6–C1–C2–C3     | –4.0(9)   |
| C1–C2–C3–C4     | 1.6(11)   | C2–C3–C4–C5     | 1.5(11)   |
| C3–C4–C5–C6     | –2.3(11)  | P1–C1–C6–C5     | –176.6(5) |
| C2–C1–C6–C5     | 3.3(9)    | C4–C5–C6–C1     | –0.2(10)  |
| Re–P1–C7–C8     | –100.7(4) | Re–P1–C7–C12    | 79.3(4)   |
| C1–P1–C7–C8     | 126.6(4)  | C1–P1–C7–C12    | –53.5(5)  |
| C13–P1–C7–C8    | 18.7(5)   | C13–P1–C7–C12   | –161.4(4) |
| P1–C7–C8–C9     | 179.2(4)  | C12–C7–C8–C9    | –0.7(8)   |
| C7–C8–C9–C10    | –0.3(8)   | C8–C9–C10–C11   | 1.8(8)    |
| C9–C10–C11–C12  | –2.2(8)   | C10–C11–C12–C7  | 1.1(8)    |
| P1–C7–C12–C11   | –179.6(4) | C8–C7–C12–C11   | 0.3(8)    |
| Re–P1–C13–C14   | 43.9(4)   | C1–P1–C13–C14   | 167.0(4)  |
| C7–P1–C13–C14   | –85.9(4)  | P1–C13–C14–P2   | –44.7(4)  |
| Re–P2–C14–C13   | 23.6(4)   | C15–P2–C14–C13  | –108.2(4) |
| C21–P2–C14–C13  | 139.7(4)  | Re–P2–C15–C16   | –76.0(5)  |
| Re–P2–C15–C20   | 106.0(5)  | C14–P2–C15–C16  | 48.8(5)   |
| C14–P2–C15–C20  | –129.2(5) | C21–P2–C15–C16  | 158.6(5)  |
| C21–P2–C15–C20  | –19.4(6)  | P2–C15–C16–C17  | –177.1(5) |
| C20–C15–C16–C17 | 1.0(9)    | C15–C16–C17–C18 | –1.0(9)   |
| C16–C17–C18–C19 | 0.9(10)   | C17–C18–C19–C20 | –0.8(10)  |
| P2–C15–C20–C19  | 177.1(5)  | C16–C15–C20–C19 | –0.9(9)   |
| C18–C19–C20–C15 | 0.8(10)   | Re–P2–C21–C22   | 43.9(4)   |
| C14–P2–C21–C22  | –73.6(4)  | C15–P2–C21–C22  | 176.8(3)  |
| P2–C21–C22–P3   | –54.5(4)  | Re–P3–C22–C21   | 39.8(4)   |
| C23–P3–C22–C21  | –83.3(4)  | C29–P3–C22–C21  | 171.0(3)  |
| Re–P3–C23–C24   | –141.5(4) | Re–P3–C23–C28   | 44.3(5)   |
| C22–P3–C23–C24  | –23.2(5)  | C22–P3–C23–C28  | 162.6(4)  |

|                 |            |                 |            |
|-----------------|------------|-----------------|------------|
| C29-P3-C23-C24  | 86.2(4)    | C29-P3-C23-C28  | -88.0(4)   |
| P3-C23-C24-C25  | -173.8(4)  | C28-C23-C24-C25 | 0.4(8)     |
| C23-C24-C25-C26 | 1.3(8)     | C24-C25-C26-C27 | -1.2(9)    |
| C25-C26-C27-C28 | -0.6(9)    | P3-C23-C28-C27  | 172.1(4)   |
| C24-C23-C28-C27 | -2.2(8)    | C26-C27-C28-C23 | 2.3(9)     |
| Re-P3-C29-C30   | -52.6(5)   | Re-P3-C29-C34   | 133.5(4)   |
| C22-P3-C29-C30  | -174.7(4)  | C22-P3-C29-C34  | 11.4(5)    |
| C23-P3-C29-C30  | 75.1(4)    | C23-P3-C29-C34  | -98.8(4)   |
| P3-C29-C30-C31  | -173.0(4)  | C34-C29-C30-C31 | 1.2(8)     |
| C29-C30-C31-C32 | -0.5(9)    | C30-C31-C32-C33 | -0.5(9)    |
| C31-C32-C33-C34 | 0.8(9)     | C32-C33-C34-C29 | -0.1(8)    |
| P3-C29-C34-C33  | 173.0(4)   | C30-C29-C34-C33 | -0.9(8)    |
| F1-C38-S-O4     | 68.1(11)   | F1-C38-S-O5     | -48.3(10)  |
| F1-C38-S-O6     | -158.4(10) | F2-C38-S-O4     | -178.1(10) |
| F2-C38-S-O5     | 65.5(8)    | F2-C38-S-O6     | -44.6(9)   |
| F3-C38-S-O4     | -65.5(12)  | F3-C38-S-O5     | 178.1(10)  |
| F3-C38-S-O6     | 68.0(11)   | F1'-C38-S-O4'   | 71.6(8)    |
| F1'-C38-S-O5'   | -38.7(11)  | F1'-C38-S-O6'   | -177.8(10) |
| F2'-C38-S-O4'   | -170.9(9)  | F2'-C38-S-O5'   | 78.8(11)   |
| F2'-C38-S-O6'   | -60.3(11)  | F3'-C38-S-O4'   | -44.8(9)   |
| F3'-C38-S-O5'   | -155.1(11) | F3'-C38-S-O6'   | 65.8(11)   |

**Table 4:5.** Anisotropic displacement parameters ( $\text{\AA}^2$ ) for ljh120152 (4). The anisotropic displacement factor exponent takes the form:  $-2\pi^2[h^2a^{*2}U^{11} + \dots + 2hka^*b^*U^{12}]$

|     | U <sup>11</sup> | U <sup>22</sup> | U <sup>33</sup> | U <sup>23</sup> | U <sup>13</sup> | U <sup>12</sup> |
|-----|-----------------|-----------------|-----------------|-----------------|-----------------|-----------------|
| Re  | 0.01755(12)     | 0.01204(11)     | 0.02008(12)     | -0.00119(7)     | 0.00199(7)      | 0.00585(8)      |
| P1  | 0.0196(6)       | 0.0144(6)       | 0.0245(7)       | -0.0003(5)      | 0.0010(5)       | 0.0073(5)       |
| P2  | 0.0214(6)       | 0.0162(6)       | 0.0225(7)       | 0.0012(5)       | 0.0049(5)       | 0.0067(5)       |
| P3  | 0.0205(6)       | 0.0128(6)       | 0.0189(7)       | -0.0007(5)      | 0.0031(5)       | 0.0073(5)       |
| C1  | 0.022(3)        | 0.019(3)        | 0.036(3)        | -0.002(2)       | 0.001(2)        | 0.010(2)        |
| C2  | 0.059(4)        | 0.039(4)        | 0.036(4)        | -0.005(3)       | -0.006(3)       | 0.034(3)        |
| C3  | 0.076(5)        | 0.043(4)        | 0.052(5)        | -0.002(3)       | -0.008(4)       | 0.043(4)        |
| C4  | 0.046(4)        | 0.027(3)        | 0.046(4)        | -0.001(3)       | 0.006(3)        | 0.023(3)        |
| C5  | 0.075(5)        | 0.048(4)        | 0.031(4)        | 0.000(3)        | 0.014(3)        | 0.043(4)        |
| C6  | 0.055(4)        | 0.043(4)        | 0.033(3)        | 0.009(3)        | 0.012(3)        | 0.037(3)        |
| C7  | 0.019(2)        | 0.017(2)        | 0.029(3)        | 0.000(2)        | 0.0024(19)      | 0.0087(19)      |
| C8  | 0.023(3)        | 0.023(3)        | 0.036(3)        | 0.000(2)        | 0.006(2)        | 0.010(2)        |
| C9  | 0.025(3)        | 0.026(3)        | 0.035(3)        | -0.009(2)       | -0.002(2)       | 0.007(2)        |
| C10 | 0.022(3)        | 0.028(3)        | 0.039(3)        | 0.003(2)        | 0.002(2)        | 0.009(2)        |
| C11 | 0.025(3)        | 0.028(3)        | 0.041(4)        | 0.006(2)        | 0.010(2)        | 0.011(2)        |
| C12 | 0.029(3)        | 0.027(3)        | 0.025(3)        | -0.003(2)       | 0.001(2)        | 0.013(2)        |
| C13 | 0.025(3)        | 0.019(2)        | 0.029(3)        | 0.008(2)        | 0.003(2)        | 0.008(2)        |
| C14 | 0.023(3)        | 0.024(3)        | 0.022(3)        | 0.002(2)        | 0.0021(19)      | 0.006(2)        |
| C15 | 0.026(3)        | 0.023(3)        | 0.021(3)        | 0.004(2)        | 0.0059(19)      | 0.006(2)        |
| C16 | 0.028(3)        | 0.029(3)        | 0.042(4)        | 0.006(3)        | 0.016(2)        | 0.006(2)        |
| C17 | 0.041(3)        | 0.036(3)        | 0.034(4)        | 0.006(3)        | 0.014(3)        | 0.004(3)        |
| C18 | 0.025(3)        | 0.054(4)        | 0.028(3)        | 0.007(3)        | 0.006(2)        | 0.002(3)        |
| C19 | 0.027(3)        | 0.065(5)        | 0.060(5)        | 0.015(4)        | 0.011(3)        | 0.023(3)        |
| C20 | 0.028(3)        | 0.040(3)        | 0.050(4)        | 0.012(3)        | 0.009(3)        | 0.015(3)        |
| C21 | 0.034(3)        | 0.021(3)        | 0.022(3)        | -0.001(2)       | 0.007(2)        | 0.014(2)        |
| C22 | 0.027(3)        | 0.015(2)        | 0.023(3)        | -0.003(2)       | 0.0016(19)      | 0.008(2)        |
| C23 | 0.021(2)        | 0.017(2)        | 0.026(3)        | 0.004(2)        | 0.0070(19)      | 0.0086(19)      |
| C24 | 0.030(3)        | 0.020(3)        | 0.032(3)        | 0.001(2)        | 0.007(2)        | 0.012(2)        |

|     |            |            |            |            |             |            |
|-----|------------|------------|------------|------------|-------------|------------|
| C25 | 0.044(3)   | 0.028(3)   | 0.040(4)   | 0.005(3)   | 0.007(3)    | 0.027(3)   |
| C26 | 0.037(3)   | 0.041(3)   | 0.043(4)   | 0.019(3)   | 0.013(3)    | 0.026(3)   |
| C27 | 0.040(3)   | 0.043(3)   | 0.028(3)   | 0.007(3)   | 0.003(2)    | 0.025(3)   |
| C28 | 0.040(3)   | 0.027(3)   | 0.031(3)   | 0.000(2)   | 0.004(2)    | 0.019(2)   |
| C29 | 0.019(2)   | 0.016(2)   | 0.029(3)   | 0.003(2)   | 0.0027(19)  | 0.0083(19) |
| C30 | 0.030(3)   | 0.018(3)   | 0.034(3)   | -0.001(2)  | 0.009(2)    | 0.005(2)   |
| C31 | 0.035(3)   | 0.025(3)   | 0.037(3)   | 0.001(2)   | 0.016(2)    | 0.007(2)   |
| C32 | 0.028(3)   | 0.021(3)   | 0.050(4)   | 0.008(3)   | 0.015(2)    | 0.009(2)   |
| C33 | 0.022(3)   | 0.023(3)   | 0.048(4)   | -0.003(3)  | 0.000(2)    | 0.004(2)   |
| C34 | 0.028(3)   | 0.020(3)   | 0.032(3)   | -0.002(2)  | 0.002(2)    | 0.007(2)   |
| C35 | 0.025(3)   | 0.016(2)   | 0.031(3)   | -0.005(2)  | 0.005(2)    | 0.008(2)   |
| O1  | 0.028(2)   | 0.039(2)   | 0.058(3)   | -0.004(2)  | -0.0040(19) | 0.0178(19) |
| C36 | 0.019(2)   | 0.014(2)   | 0.036(3)   | 0.005(2)   | 0.001(2)    | 0.0071(19) |
| O2  | 0.056(3)   | 0.036(2)   | 0.022(2)   | 0.0023(18) | 0.0129(18)  | 0.022(2)   |
| C37 | 0.022(3)   | 0.030(3)   | 0.031(3)   | 0.005(2)   | 0.004(2)    | 0.012(2)   |
| O3  | 0.036(2)   | 0.012(2)   | 0.078(4)   | 0.001(2)   | 0.002(2)    | 0.0008(17) |
| C38 | 0.064(4)   | 0.059(3)   | 0.047(3)   | -0.015(3)  | 0.005(3)    | 0.021(3)   |
| S   | 0.0854(16) | 0.0723(15) | 0.0567(14) | 0.0174(11) | -0.0014(11) | 0.0018(12) |
| F1  | 0.078(8)   | 0.090(9)   | 0.044(4)   | -0.015(4)  | 0.020(4)    | -0.022(6)  |
| F2  | 0.069(5)   | 0.105(9)   | 0.117(10)  | -0.050(8)  | -0.015(5)   | 0.025(5)   |
| F3  | 0.111(12)  | 0.066(6)   | 0.046(7)   | -0.013(5)  | -0.018(7)   | 0.046(6)   |
| O4  | 0.054(5)   | 0.161(14)  | 0.087(11)  | 0.061(10)  | 0.001(5)    | 0.020(6)   |
| O5  | 0.085(8)   | 0.035(5)   | 0.037(6)   | -0.001(4)  | -0.004(5)   | -0.010(5)  |
| O6  | 0.080(6)   | 0.027(5)   | 0.027(4)   | 0.004(4)   | 0.007(4)    | 0.022(5)   |
| F1' | 0.098(8)   | 0.054(6)   | 0.047(5)   | 0.009(4)   | -0.002(5)   | 0.001(5)   |
| F2' | 0.126(8)   | 0.108(9)   | 0.100(9)   | 0.040(7)   | 0.072(7)    | 0.070(7)   |
| F3' | 0.052(5)   | 0.046(4)   | 0.040(5)   | -0.005(4)  | -0.015(4)   | 0.018(4)   |
| O4' | 0.048(5)   | 0.074(7)   | 0.062(7)   | 0.020(5)   | 0.007(5)    | -0.007(5)  |
| O5' | 0.149(11)  | 0.041(5)   | 0.041(6)   | 0.015(4)   | -0.035(7)   | -0.021(6)  |
| O6' | 0.155(11)  | 0.114(12)  | 0.082(8)   | -0.039(7)  | -0.048(8)   | 0.076(9)   |



**Table 4:6.** Hydrogen coordinates and isotropic displacement parameters ( $\text{\AA}^2$ ) for ljh120152 (4).

|      | x       | y       | z      | U     |
|------|---------|---------|--------|-------|
| H2   | 0.4281  | 0.7311  | 0.1889 | 0.052 |
| H3   | 0.3676  | 0.8906  | 0.2478 | 0.064 |
| H4   | 0.3812  | 0.9363  | 0.3909 | 0.046 |
| H5   | 0.4636  | 0.8275  | 0.4741 | 0.056 |
| H6   | 0.5192  | 0.6657  | 0.4153 | 0.045 |
| H8   | 0.3158  | 0.3650  | 0.1062 | 0.033 |
| H9   | 0.0864  | 0.2067  | 0.0843 | 0.038 |
| H10  | -0.0406 | 0.1662  | 0.1945 | 0.036 |
| H11  | 0.0583  | 0.2920  | 0.3241 | 0.037 |
| H12  | 0.2884  | 0.4488  | 0.3469 | 0.033 |
| H13A | 0.4549  | 0.5717  | 0.1131 | 0.030 |
| H13B | 0.6138  | 0.6688  | 0.1553 | 0.030 |
| H14A | 0.6512  | 0.5366  | 0.0565 | 0.029 |
| H14B | 0.5327  | 0.4178  | 0.0800 | 0.029 |
| H16  | 0.8715  | 0.7246  | 0.1409 | 0.041 |
| H17  | 1.0754  | 0.8435  | 0.0905 | 0.048 |
| H18  | 1.2466  | 0.7653  | 0.0611 | 0.048 |
| H19  | 1.2110  | 0.5665  | 0.0779 | 0.059 |
| H20  | 1.0062  | 0.4458  | 0.1283 | 0.046 |
| H21A | 0.7079  | 0.2969  | 0.0818 | 0.030 |
| H21B | 0.8074  | 0.3067  | 0.1667 | 0.030 |
| H22A | 0.5763  | 0.1549  | 0.1630 | 0.028 |
| H22B | 0.5028  | 0.2486  | 0.1453 | 0.028 |
| H24  | 0.6751  | 0.0797  | 0.2407 | 0.032 |
| H25  | 0.7927  | -0.0222 | 0.3122 | 0.041 |
| H26  | 0.8909  | 0.0522  | 0.4518 | 0.042 |
| H27  | 0.8790  | 0.2309  | 0.5192 | 0.042 |
| H28  | 0.7730  | 0.3386  | 0.4465 | 0.038 |

|     |        |         |        |       |
|-----|--------|---------|--------|-------|
| H30 | 0.4742 | 0.3019  | 0.4289 | 0.035 |
| H31 | 0.2621 | 0.1841  | 0.4699 | 0.040 |
| H32 | 0.0849 | 0.0184  | 0.3764 | 0.039 |
| H33 | 0.1200 | -0.0263 | 0.2425 | 0.041 |
| H34 | 0.3339 | 0.0903  | 0.2000 | 0.034 |

## 5.5 Crystallographic data for *fac*-[Re(CO)<sub>3</sub>(2)][OTf] (5)

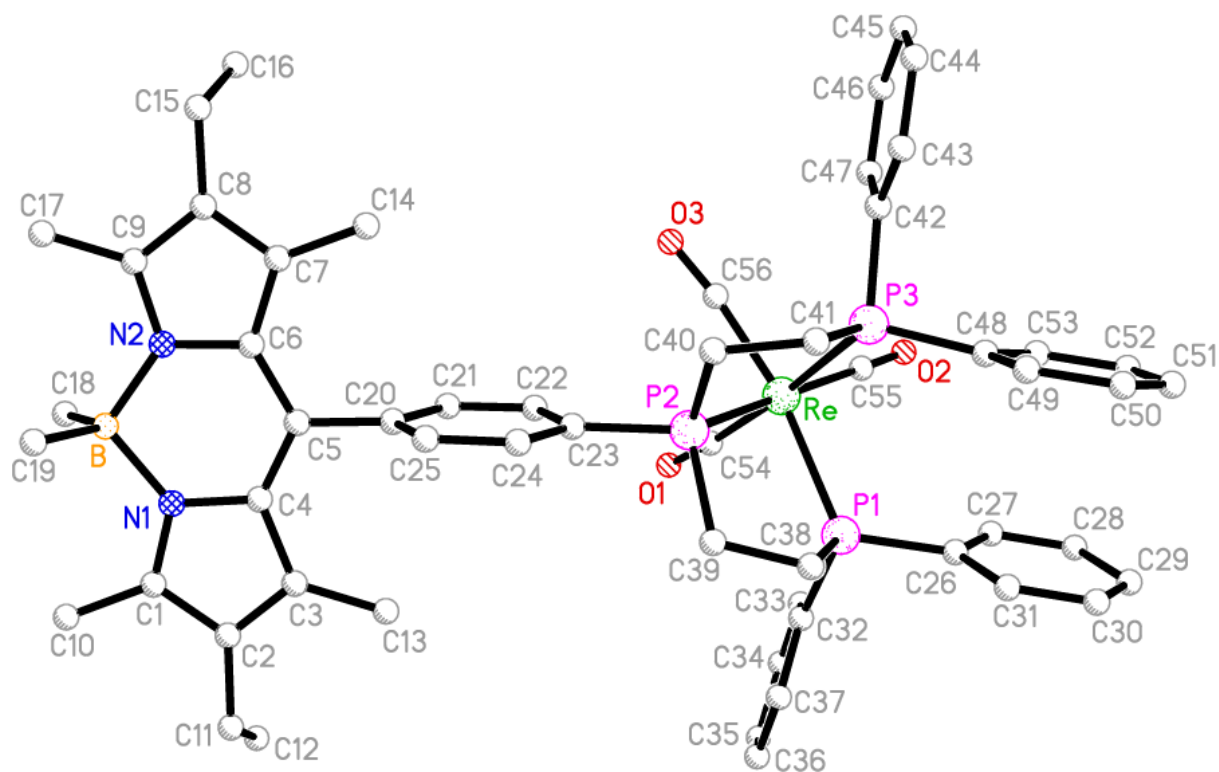

**Table 5:1.** Crystal data and structure refinement for ljh120041 (5).

|                                       |                                                                                  |                            |
|---------------------------------------|----------------------------------------------------------------------------------|----------------------------|
| Identification code                   | ljh120041 (5)                                                                    |                            |
| Chemical formula (moiety)             | $C_{56}H_{60}BN_2O_3P_3Re^+ \cdot CF_3O_3S^- \cdot C_7H_8N_2O_2 \cdot C_5H_{12}$ |                            |
| Chemical formula (total)              | $C_{69}H_{80}BF_3N_4O_8P_3ReS$                                                   |                            |
| Formula weight                        | 1472.35                                                                          |                            |
| Temperature                           | 150(2) K                                                                         |                            |
| Radiation, wavelength                 | CuK $\alpha$ , 1.54178 Å                                                         |                            |
| Crystal system, space group           | triclinic, $P\bar{1}$                                                            |                            |
| Unit cell parameters                  | $a = 11.7574(5)$ Å                                                               | $\alpha = 92.712(2)^\circ$ |
|                                       | $b = 16.2273(5)$ Å                                                               | $\beta = 97.724(3)^\circ$  |
|                                       | $c = 18.3187(6)$ Å                                                               | $\gamma = 98.344(3)^\circ$ |
| Cell volume                           | 3418.7(2) Å <sup>3</sup>                                                         |                            |
| Z                                     | 2                                                                                |                            |
| Calculated density                    | 1.430 g/cm <sup>3</sup>                                                          |                            |
| Absorption coefficient $\mu$          | 4.957 mm <sup>-1</sup>                                                           |                            |
| F(000)                                | 1508                                                                             |                            |
| Crystal colour and size               | red, 0.30 × 0.20 × 0.20 mm <sup>3</sup>                                          |                            |
| Reflections for cell refinement       | 15771 ( $\theta$ range 2.4 to 66.7°)                                             |                            |
| Data collection method                | Agilent Technologies Gemini A Ultra<br>$\omega$ scans                            |                            |
| $\theta$ range for data collection    | 2.4 to 66.8°                                                                     |                            |
| Index ranges                          | h -13 to 13, k -19 to 17, l -15 to 21                                            |                            |
| Completeness to $\theta = 67.7^\circ$ | 95.5 %                                                                           |                            |
| Reflections collected                 | 23448                                                                            |                            |
| Independent reflections               | 11816 ( $R_{int} = 0.0791$ )                                                     |                            |
| Reflections with $F^2 > 2\sigma$      | 11250                                                                            |                            |
| Absorption correction                 | multi-scan                                                                       |                            |
| Min. and max. transmission            | 0.320 and 1.440                                                                  |                            |
| Structure solution                    | direct methods                                                                   |                            |
| Refinement method                     | Full-matrix least-squares on $F^2$                                               |                            |
| Weighting parameters a, b             | 0.1725, 3.1808                                                                   |                            |
| Data / restraints / parameters        | 11816 / 151 / 839                                                                |                            |

|                                     |                                             |
|-------------------------------------|---------------------------------------------|
| Final R indices [ $F^2 > 2\sigma$ ] | R1 = 0.0732, wR2 = 0.1994                   |
| R indices (all data)                | R1 = 0.0748, wR2 = 0.2032                   |
| Goodness-of-fit on $F^2$            | 1.027                                       |
| Largest and mean shift/su           | 0.001 and 0.000                             |
| Largest diff. peak and hole         | 5.94 and $-3.21 \text{ e } \text{\AA}^{-3}$ |

**Table 5:2.** Atomic coordinates and equivalent isotropic displacement parameters ( $\text{\AA}^2$ ) for ljh120041 (5).  $U_{\text{eq}}$  is defined as one third of the trace of the orthogonalised  $U^{\text{ij}}$  tensor.

|     | x          | y          | z          | $U_{\text{eq}}$ |
|-----|------------|------------|------------|-----------------|
| Re  | 0.19020(2) | 0.12846(2) | 0.35199(2) | 0.01900(14)     |
| B   | 0.7285(6)  | 0.1677(4)  | 0.8763(4)  | 0.0264(13)      |
| N1  | 0.7687(4)  | 0.1856(3)  | 0.7985(3)  | 0.0285(10)      |
| N2  | 0.5911(4)  | 0.1546(3)  | 0.8617(2)  | 0.0263(10)      |
| C1  | 0.8783(5)  | 0.2002(4)  | 0.7838(3)  | 0.0323(13)      |
| C2  | 0.8801(5)  | 0.2186(4)  | 0.7088(3)  | 0.0327(13)      |
| C3  | 0.7664(5)  | 0.2159(4)  | 0.6772(3)  | 0.0330(13)      |
| C4  | 0.6952(5)  | 0.1952(4)  | 0.7338(3)  | 0.0266(12)      |
| C5  | 0.5768(5)  | 0.1873(3)  | 0.7333(3)  | 0.0259(11)      |
| C6  | 0.5229(5)  | 0.1672(4)  | 0.7950(3)  | 0.0255(11)      |
| C7  | 0.4046(5)  | 0.1564(4)  | 0.8057(3)  | 0.0291(12)      |
| C8  | 0.4020(6)  | 0.1376(4)  | 0.8788(3)  | 0.0344(13)      |
| C9  | 0.5175(5)  | 0.1372(4)  | 0.9114(3)  | 0.0309(13)      |
| C10 | 0.9843(6)  | 0.2004(5)  | 0.8391(4)  | 0.0406(16)      |
| C11 | 0.9874(6)  | 0.2369(5)  | 0.6730(4)  | 0.0411(16)      |
| C12 | 1.0175(7)  | 0.1588(6)  | 0.6333(4)  | 0.0542(19)      |
| C13 | 0.7280(6)  | 0.2302(5)  | 0.5979(3)  | 0.0439(17)      |
| C14 | 0.3006(5)  | 0.1657(5)  | 0.7524(4)  | 0.0375(15)      |
| C15 | 0.2958(6)  | 0.1197(5)  | 0.9162(4)  | 0.0418(15)      |
| C16 | 0.2290(6)  | 0.0312(5)  | 0.8968(4)  | 0.0480(17)      |
| C17 | 0.5562(7)  | 0.1210(5)  | 0.9901(3)  | 0.0438(16)      |
| C18 | 0.7721(6)  | 0.0817(4)  | 0.9054(4)  | 0.0355(14)      |
| C19 | 0.7715(6)  | 0.2506(4)  | 0.9312(3)  | 0.0349(14)      |
| C20 | 0.5021(5)  | 0.1985(4)  | 0.6625(3)  | 0.0258(12)      |
| C21 | 0.4575(5)  | 0.1303(3)  | 0.6129(3)  | 0.0269(12)      |
| C22 | 0.3914(5)  | 0.1428(4)  | 0.5465(3)  | 0.0259(11)      |
| C23 | 0.3708(5)  | 0.2221(4)  | 0.5287(3)  | 0.0253(11)      |
| C24 | 0.4157(5)  | 0.2899(4)  | 0.5791(3)  | 0.0314(13)      |
| C25 | 0.4799(6)  | 0.2784(4)  | 0.6465(3)  | 0.0329(13)      |

|     |             |            |            |            |
|-----|-------------|------------|------------|------------|
| P1  | 0.29894(12) | 0.21455(9) | 0.27022(7) | 0.0221(3)  |
| P2  | 0.28642(12) | 0.23933(8) | 0.44216(7) | 0.0205(3)  |
| P3  | 0.03682(12) | 0.21926(8) | 0.34447(7) | 0.0193(3)  |
| C26 | 0.2301(5)   | 0.2292(4)  | 0.1773(3)  | 0.0288(12) |
| C27 | 0.1881(5)   | 0.1593(4)  | 0.1294(3)  | 0.0346(13) |
| C28 | 0.1386(6)   | 0.1672(5)  | 0.0576(4)  | 0.0419(16) |
| C29 | 0.1314(6)   | 0.2474(5)  | 0.0329(4)  | 0.0457(17) |
| C30 | 0.1726(7)   | 0.3161(6)  | 0.0807(4)  | 0.0467(18) |
| C31 | 0.2226(6)   | 0.3087(4)  | 0.1532(3)  | 0.0342(13) |
| C32 | 0.4348(5)   | 0.1823(4)  | 0.2516(3)  | 0.0259(11) |
| C33 | 0.4342(5)   | 0.0991(4)  | 0.2290(3)  | 0.0330(13) |
| C34 | 0.5325(6)   | 0.0725(4)  | 0.2071(4)  | 0.0387(14) |
| C35 | 0.6332(6)   | 0.1287(5)  | 0.2091(4)  | 0.0405(15) |
| C36 | 0.6348(6)   | 0.2115(5)  | 0.2320(4)  | 0.0383(15) |
| C37 | 0.5363(5)   | 0.2386(4)  | 0.2528(3)  | 0.0307(13) |
| C38 | 0.3403(5)   | 0.3196(3)  | 0.3169(3)  | 0.0262(11) |
| C39 | 0.3846(5)   | 0.3141(3)  | 0.3992(3)  | 0.0267(12) |
| C40 | 0.1744(5)   | 0.2952(4)  | 0.4728(3)  | 0.0266(11) |
| C41 | 0.0895(5)   | 0.3141(3)  | 0.4071(3)  | 0.0255(11) |
| C42 | -0.0998(5)  | 0.1736(3)  | 0.3742(3)  | 0.0231(11) |
| C43 | -0.1764(5)  | 0.2244(4)  | 0.3966(3)  | 0.0277(12) |
| C44 | -0.2827(5)  | 0.1892(4)  | 0.4144(3)  | 0.0331(13) |
| C45 | -0.3145(5)  | 0.1038(4)  | 0.4101(3)  | 0.0370(14) |
| C46 | -0.2398(6)  | 0.0525(4)  | 0.3873(4)  | 0.0363(15) |
| C47 | -0.1331(5)  | 0.0876(4)  | 0.3694(3)  | 0.0289(12) |
| C48 | -0.0176(4)  | 0.2587(3)  | 0.2572(3)  | 0.0219(10) |
| C49 | -0.0304(5)  | 0.3428(4)  | 0.2515(3)  | 0.0276(12) |
| C50 | -0.0816(5)  | 0.3690(4)  | 0.1851(3)  | 0.0317(13) |
| C51 | -0.1191(5)  | 0.3128(4)  | 0.1247(3)  | 0.0335(13) |
| C52 | -0.1069(5)  | 0.2301(4)  | 0.1303(3)  | 0.0304(12) |
| C53 | -0.0558(5)  | 0.2028(4)  | 0.1963(3)  | 0.0278(12) |
| C54 | 0.3109(5)   | 0.0600(3)  | 0.3674(3)  | 0.0239(11) |
| O1  | 0.3788(4)   | 0.0164(3)  | 0.3792(3)  | 0.0441(11) |

|      |              |             |             |            |
|------|--------------|-------------|-------------|------------|
| C55  | 0.1003(5)    | 0.0476(4)   | 0.2739(3)   | 0.0281(13) |
| O2   | 0.0487(4)    | 0.0014(3)   | 0.2305(3)   | 0.0402(11) |
| C56  | 0.1275(5)    | 0.0742(4)   | 0.4335(3)   | 0.0286(12) |
| O3   | 0.1007(4)    | 0.0443(3)   | 0.4856(3)   | 0.0455(12) |
| C57  | -0.1903(8)   | 0.5098(8)   | 0.3882(7)   | 0.085(4)   |
| F1   | -0.1004(5)   | 0.5305(8)   | 0.4440(6)   | 0.155(4)   |
| F2   | -0.2040(7)   | 0.5792(5)   | 0.3610(4)   | 0.116(3)   |
| F3   | -0.1573(8)   | 0.4642(7)   | 0.3376(6)   | 0.165(5)   |
| S    | -0.31634(16) | 0.45943(10) | 0.42436(11) | 0.0444(4)  |
| O4   | -0.3382(5)   | 0.5215(3)   | 0.4754(3)   | 0.0569(15) |
| O5   | -0.3977(6)   | 0.4402(5)   | 0.3606(4)   | 0.087(2)   |
| O6   | -0.2819(11)  | 0.3880(6)   | 0.4605(6)   | 0.125(4)   |
| C58  | 0.1007(7)    | 0.5321(5)   | 0.0928(4)   | 0.0484(18) |
| C59  | 0.1745(8)    | 0.5402(4)   | 0.1652(4)   | 0.0505(19) |
| C60  | 0.1292(7)    | 0.5486(4)   | 0.2305(4)   | 0.0470(17) |
| C61  | 0.1931(7)    | 0.5450(4)   | 0.2990(4)   | 0.0479(18) |
| C62  | 0.3108(7)    | 0.5334(4)   | 0.3024(4)   | 0.0467(17) |
| C63  | 0.3586(7)    | 0.5284(4)   | 0.2370(4)   | 0.0467(17) |
| C64  | 0.2900(7)    | 0.5315(5)   | 0.1692(4)   | 0.0494(18) |
| O7   | -0.0065(6)   | 0.5405(4)   | 0.0913(3)   | 0.0613(16) |
| O8   | 0.1418(6)    | 0.5151(4)   | 0.0348(3)   | 0.0588(15) |
| N3   | 0.1462(8)    | 0.5432(5)   | 0.3635(4)   | 0.071(2)   |
| N4   | 0.3779(7)    | 0.5282(4)   | 0.3694(4)   | 0.0527(17) |
| C65  | 0.522(2)     | 0.3456(15)  | 1.0745(16)  | 0.201(9)   |
| C66  | 0.545(3)     | 0.386(3)    | 1.010(2)    | 0.197(10)  |
| C67  | 0.411(3)     | 0.377(5)    | 0.9599(17)  | 0.198(10)  |
| C68  | 0.384(3)     | 0.366(4)    | 0.868(2)    | 0.207(11)  |
| C69  | 0.275(2)     | 0.3931(18)  | 0.8474(17)  | 0.224(10)  |
| C66' | 0.512(5)     | 0.332(4)    | 0.9959(19)  | 0.211(11)  |
| C67' | 0.400(4)     | 0.378(5)    | 0.961(2)    | 0.208(10)  |
| C68' | 0.391(3)     | 0.427(3)    | 0.881(3)    | 0.209(11)  |



**Table 5:3.** Bond lengths [Å] and angles [°] for ljh120041 (**5**).

|          |            |          |            |
|----------|------------|----------|------------|
| Re–P1    | 2.4544(13) | Re–P2    | 2.4230(14) |
| Re–P3    | 2.4831(14) | Re–C54   | 1.926(6)   |
| Re–C55   | 1.975(6)   | Re–C56   | 1.944(6)   |
| B–N1     | 1.588(8)   | B–N2     | 1.583(8)   |
| B–C18    | 1.641(8)   | B–C19    | 1.616(9)   |
| N1–C1    | 1.340(8)   | N1–C4    | 1.398(7)   |
| N2–C6    | 1.409(7)   | N2–C9    | 1.350(8)   |
| C1–C2    | 1.423(9)   | C1–C10   | 1.496(8)   |
| C2–C3    | 1.378(9)   | C2–C11   | 1.497(9)   |
| C3–C4    | 1.441(8)   | C3–C13   | 1.501(8)   |
| C4–C5    | 1.379(8)   | C5–C6    | 1.397(8)   |
| C5–C20   | 1.499(7)   | C6–C7    | 1.417(8)   |
| C7–C8    | 1.390(9)   | C7–C14   | 1.490(8)   |
| C8–C9    | 1.409(9)   | C8–C15   | 1.502(9)   |
| C9–C17   | 1.499(8)   | C10–H10A | 0.980      |
| C10–H10B | 0.980      | C10–H10C | 0.980      |
| C11–H11A | 0.990      | C11–H11B | 0.990      |
| C11–C12  | 1.540(11)  | C12–H12A | 0.980      |
| C12–H12B | 0.980      | C12–H12C | 0.980      |
| C13–H13A | 0.980      | C13–H13B | 0.980      |
| C13–H13C | 0.980      | C14–H14A | 0.980      |
| C14–H14B | 0.980      | C14–H14C | 0.980      |
| C15–H15A | 0.990      | C15–H15B | 0.990      |
| C15–C16  | 1.534(10)  | C16–H16A | 0.980      |
| C16–H16B | 0.980      | C16–H16C | 0.980      |
| C17–H17A | 0.980      | C17–H17B | 0.980      |
| C17–H17C | 0.980      | C18–H18A | 0.980      |
| C18–H18B | 0.980      | C18–H18C | 0.980      |
| C19–H19A | 0.980      | C19–H19B | 0.980      |
| C19–H19C | 0.980      | C20–C21  | 1.391(8)   |
| C20–C25  | 1.396(9)   | C21–H21  | 0.950      |
| C21–C22  | 1.394(8)   | C22–H22  | 0.950      |

|          |           |          |           |
|----------|-----------|----------|-----------|
| C22–C23  | 1.389(8)  | C23–C24  | 1.395(8)  |
| C23–P2   | 1.809(5)  | C24–H24  | 0.950     |
| C24–C25  | 1.394(8)  | C25–H25  | 0.950     |
| P1–C26   | 1.825(6)  | P1–C32   | 1.821(6)  |
| P1–C38   | 1.840(6)  | P2–C39   | 1.831(5)  |
| P2–C40   | 1.836(6)  | P3–C41   | 1.852(6)  |
| P3–C42   | 1.831(5)  | P3–C48   | 1.820(5)  |
| C26–C27  | 1.388(9)  | C26–C31  | 1.395(9)  |
| C27–H27  | 0.950     | C27–C28  | 1.385(9)  |
| C28–H28  | 0.950     | C28–C29  | 1.407(11) |
| C29–H29  | 0.950     | C29–C30  | 1.372(12) |
| C30–H30  | 0.950     | C30–C31  | 1.396(9)  |
| C31–H31  | 0.950     | C32–C33  | 1.392(9)  |
| C32–C37  | 1.390(8)  | C33–H33  | 0.950     |
| C33–C34  | 1.391(9)  | C34–H34  | 0.950     |
| C34–C35  | 1.381(10) | C35–H35  | 0.950     |
| C35–C36  | 1.385(11) | C36–H36  | 0.950     |
| C36–C37  | 1.389(10) | C37–H37  | 0.950     |
| C38–H38A | 0.990     | C38–H38B | 0.990     |
| C38–C39  | 1.538(7)  | C39–H39A | 0.990     |
| C39–H39B | 0.990     | C40–H40A | 0.990     |
| C40–H40B | 0.990     | C40–C41  | 1.530(7)  |
| C41–H41A | 0.990     | C41–H41B | 0.990     |
| C42–C43  | 1.394(8)  | C42–C47  | 1.390(8)  |
| C43–H43  | 0.950     | C43–C44  | 1.384(8)  |
| C44–H44  | 0.950     | C44–C45  | 1.378(10) |
| C45–H45  | 0.950     | C45–C46  | 1.384(10) |
| C46–H46  | 0.950     | C46–C47  | 1.387(9)  |
| C47–H47  | 0.950     | C48–C49  | 1.402(8)  |
| C48–C53  | 1.387(8)  | C49–H49  | 0.950     |
| C49–C50  | 1.395(8)  | C50–H50  | 0.950     |
| C50–C51  | 1.381(9)  | C51–H51  | 0.950     |
| C51–C52  | 1.376(9)  | C52–H52  | 0.950     |
| C52–C53  | 1.397(8)  | C53–H53  | 0.950     |

|           |           |           |           |
|-----------|-----------|-----------|-----------|
| C54-O1    | 1.147(7)  | C55-O2    | 1.115(7)  |
| C56-O3    | 1.152(8)  | C57-F1    | 1.359(15) |
| C57-F2    | 1.275(16) | C57-F3    | 1.293(11) |
| C57-S     | 1.808(10) | S-O4      | 1.417(6)  |
| S-O5      | 1.399(7)  | S-O6      | 1.443(8)  |
| C58-C59   | 1.474(11) | C58-O7    | 1.284(10) |
| C58-O8    | 1.260(10) | C59-C60   | 1.382(11) |
| C59-C64   | 1.378(12) | C60-H60   | 0.950     |
| C60-C61   | 1.383(11) | C61-C62   | 1.417(12) |
| C61-N3    | 1.368(11) | C62-C63   | 1.394(11) |
| C62-N4    | 1.379(10) | C63-H63   | 0.950     |
| C63-C64   | 1.395(11) | C64-H64   | 0.950     |
| O8-H8     | 0.840     | N3-H3A    | 0.880     |
| N3-H3B    | 0.880     | N4-H4A    | 0.880     |
| N4-H4B    | 0.880     | C65-H65A  | 0.980     |
| C65-H65B  | 0.980     | C65-H65C  | 0.980     |
| C65-H65D  | 0.980     | C65-H65E  | 0.980     |
| C65-H65F  | 0.980     | C65-C66   | 1.42(3)   |
| C65-C66'  | 1.43(3)   | C66-H66A  | 0.990     |
| C66-H66B  | 0.990     | C66-C67   | 1.69(3)   |
| C67-H67A  | 0.990     | C67-H67B  | 0.990     |
| C67-C68   | 1.67(3)   | C68-H68A  | 0.990     |
| C68-H68B  | 0.990     | C68-C69   | 1.42(3)   |
| C69-H69A  | 0.980     | C69-H69B  | 0.980     |
| C69-H69C  | 0.980     | C69-H69D  | 0.980     |
| C69-H69E  | 0.980     | C69-H69F  | 0.980     |
| C69-C68'  | 1.43(3)   | C66'-H66C | 0.990     |
| C66'-H66D | 0.990     | C66'-C67' | 1.68(3)   |
| C67'-H67C | 0.990     | C67'-H67D | 0.990     |
| C67'-C68' | 1.69(3)   | C68'-H68C | 0.990     |
| C68'-H68D | 0.990     |           |           |
| P1-Re-P2  | 81.44(5)  | P1-Re-P3  | 91.64(4)  |
| P1-Re-C54 | 91.25(17) | P1-Re-C55 | 96.49(17) |

|               |            |               |            |
|---------------|------------|---------------|------------|
| P1-Re-C56     | 167.69(18) | P2-Re-P3      | 81.11(4)   |
| P2-Re-C54     | 95.05(17)  | P2-Re-C55     | 173.27(17) |
| P2-Re-C56     | 86.79(18)  | P3-Re-C54     | 174.80(17) |
| P3-Re-C55     | 92.58(18)  | P3-Re-C56     | 90.10(17)  |
| C54-Re-C55    | 91.4(2)    | C54-Re-C56    | 86.2(2)    |
| C55-Re-C56    | 95.6(2)    | N1-B-N2       | 105.3(4)   |
| N1-B-C18      | 109.9(5)   | N1-B-C19      | 108.3(5)   |
| N2-B-C18      | 109.4(5)   | N2-B-C19      | 107.6(5)   |
| C18-B-C19     | 115.8(5)   | B-N1-C1       | 126.7(5)   |
| B-N1-C4       | 125.5(5)   | C1-N1-C4      | 107.7(5)   |
| B-N2-C6       | 125.6(5)   | B-N2-C9       | 127.2(5)   |
| C6-N2-C9      | 106.9(5)   | N1-C1-C2      | 110.5(5)   |
| N1-C1-C10     | 125.0(6)   | C2-C1-C10     | 124.5(6)   |
| C1-C2-C3      | 107.0(5)   | C1-C2-C11     | 125.1(6)   |
| C3-C2-C11     | 127.9(6)   | C2-C3-C4      | 106.8(5)   |
| C2-C3-C13     | 124.9(6)   | C4-C3-C13     | 128.2(6)   |
| N1-C4-C3      | 108.0(5)   | N1-C4-C5      | 120.6(5)   |
| C3-C4-C5      | 131.4(5)   | C4-C5-C6      | 123.2(5)   |
| C4-C5-C20     | 118.3(5)   | C6-C5-C20     | 118.5(5)   |
| N2-C6-C5      | 119.5(5)   | N2-C6-C7      | 108.7(5)   |
| C5-C6-C7      | 131.8(5)   | C6-C7-C8      | 106.6(5)   |
| C6-C7-C14     | 128.7(5)   | C8-C7-C14     | 124.6(5)   |
| C7-C8-C9      | 107.4(5)   | C7-C8-C15     | 126.5(6)   |
| C9-C8-C15     | 126.0(6)   | N2-C9-C8      | 110.4(5)   |
| N2-C9-C17     | 123.6(6)   | C8-C9-C17     | 126.0(6)   |
| C1-C10-H10A   | 109.5      | C1-C10-H10B   | 109.5      |
| C1-C10-H10C   | 109.5      | H10A-C10-H10B | 109.5      |
| H10A-C10-H10C | 109.5      | H10B-C10-H10C | 109.5      |
| C2-C11-H11A   | 109.0      | C2-C11-H11B   | 109.0      |
| C2-C11-C12    | 112.7(6)   | H11A-C11-H11B | 107.8      |
| H11A-C11-C12  | 109.0      | H11B-C11-C12  | 109.0      |
| C11-C12-H12A  | 109.5      | C11-C12-H12B  | 109.5      |
| C11-C12-H12C  | 109.5      | H12A-C12-H12B | 109.5      |
| H12A-C12-H12C | 109.5      | H12B-C12-H12C | 109.5      |

|               |            |               |            |
|---------------|------------|---------------|------------|
| C3-C13-H13A   | 109.5      | C3-C13-H13B   | 109.5      |
| C3-C13-H13C   | 109.5      | H13A-C13-H13B | 109.5      |
| H13A-C13-H13C | 109.5      | H13B-C13-H13C | 109.5      |
| C7-C14-H14A   | 109.5      | C7-C14-H14B   | 109.5      |
| C7-C14-H14C   | 109.5      | H14A-C14-H14B | 109.5      |
| H14A-C14-H14C | 109.5      | H14B-C14-H14C | 109.5      |
| C8-C15-H15A   | 108.9      | C8-C15-H15B   | 108.9      |
| C8-C15-C16    | 113.4(6)   | H15A-C15-H15B | 107.7      |
| H15A-C15-C16  | 108.9      | H15B-C15-C16  | 108.9      |
| C15-C16-H16A  | 109.5      | C15-C16-H16B  | 109.5      |
| C15-C16-H16C  | 109.5      | H16A-C16-H16B | 109.5      |
| H16A-C16-H16C | 109.5      | H16B-C16-H16C | 109.5      |
| C9-C17-H17A   | 109.5      | C9-C17-H17B   | 109.5      |
| C9-C17-H17C   | 109.5      | H17A-C17-H17B | 109.5      |
| H17A-C17-H17C | 109.5      | H17B-C17-H17C | 109.5      |
| B-C18-H18A    | 109.5      | B-C18-H18B    | 109.5      |
| B-C18-H18C    | 109.5      | H18A-C18-H18B | 109.5      |
| H18A-C18-H18C | 109.5      | H18B-C18-H18C | 109.5      |
| B-C19-H19A    | 109.5      | B-C19-H19B    | 109.5      |
| B-C19-H19C    | 109.5      | H19A-C19-H19B | 109.5      |
| H19A-C19-H19C | 109.5      | H19B-C19-H19C | 109.5      |
| C5-C20-C21    | 120.3(5)   | C5-C20-C25    | 119.2(5)   |
| C21-C20-C25   | 120.6(5)   | C20-C21-H21   | 120.4      |
| C20-C21-C22   | 119.1(5)   | H21-C21-C22   | 120.4      |
| C21-C22-H22   | 119.4      | C21-C22-C23   | 121.2(5)   |
| H22-C22-C23   | 119.4      | C22-C23-C24   | 119.0(5)   |
| C22-C23-P2    | 121.6(4)   | C24-C23-P2    | 119.3(4)   |
| C23-C24-H24   | 119.7      | C23-C24-C25   | 120.6(5)   |
| H24-C24-C25   | 119.7      | C20-C25-C24   | 119.4(5)   |
| C20-C25-H25   | 120.3      | C24-C25-H25   | 120.3      |
| Re-P1-C26     | 119.76(19) | Re-P1-C32     | 116.06(19) |
| Re-P1-C38     | 107.03(18) | C26-P1-C32    | 101.5(3)   |
| C26-P1-C38    | 106.1(3)   | C32-P1-C38    | 105.2(3)   |
| Re-P2-C23     | 123.97(19) | Re-P2-C39     | 110.10(19) |

|              |            |               |            |
|--------------|------------|---------------|------------|
| Re-P2-C40    | 107.71(18) | C23-P2-C39    | 104.2(3)   |
| C23-P2-C40   | 102.3(3)   | C39-P2-C40    | 107.4(3)   |
| Re-P3-C41    | 108.78(18) | Re-P3-C42     | 115.23(18) |
| Re-P3-C48    | 121.15(18) | C41-P3-C42    | 105.1(3)   |
| C41-P3-C48   | 104.5(3)   | C42-P3-C48    | 100.5(2)   |
| P1-C26-C27   | 118.8(5)   | P1-C26-C31    | 121.4(5)   |
| C27-C26-C31  | 119.8(6)   | C26-C27-H27   | 119.5      |
| C26-C27-C28  | 121.0(6)   | H27-C27-C28   | 119.5      |
| C27-C28-H28  | 120.3      | C27-C28-C29   | 119.4(6)   |
| H28-C28-C29  | 120.3      | C28-C29-H29   | 120.3      |
| C28-C29-C30  | 119.3(6)   | H29-C29-C30   | 120.4      |
| C29-C30-H30  | 119.1      | C29-C30-C31   | 121.7(7)   |
| H30-C30-C31  | 119.1      | C26-C31-C30   | 118.8(7)   |
| C26-C31-H31  | 120.6      | C30-C31-H31   | 120.6      |
| P1-C32-C33   | 118.4(4)   | P1-C32-C37    | 122.6(5)   |
| C33-C32-C37  | 118.8(6)   | C32-C33-H33   | 119.5      |
| C32-C33-C34  | 120.9(6)   | H33-C33-C34   | 119.5      |
| C33-C34-H34  | 120.0      | C33-C34-C35   | 119.9(6)   |
| H34-C34-C35  | 120.0      | C34-C35-H35   | 120.3      |
| C34-C35-C36  | 119.5(6)   | H35-C35-C36   | 120.3      |
| C35-C36-H36  | 119.6      | C35-C36-C37   | 120.8(6)   |
| H36-C36-C37  | 119.6      | C32-C37-C36   | 120.1(6)   |
| C32-C37-H37  | 120.0      | C36-C37-H37   | 120.0      |
| P1-C38-H38A  | 109.5      | P1-C38-H38B   | 109.5      |
| P1-C38-C39   | 110.5(4)   | H38A-C38-H38B | 108.1      |
| H38A-C38-C39 | 109.5      | H38B-C38-C39  | 109.5      |
| P2-C39-C38   | 111.6(4)   | P2-C39-H39A   | 109.3      |
| P2-C39-H39B  | 109.3      | C38-C39-H39A  | 109.3      |
| C38-C39-H39B | 109.3      | H39A-C39-H39B | 108.0      |
| P2-C40-H40A  | 109.4      | P2-C40-H40B   | 109.4      |
| P2-C40-C41   | 111.1(4)   | H40A-C40-H40B | 108.0      |
| H40A-C40-C41 | 109.4      | H40B-C40-C41  | 109.4      |
| P3-C41-C40   | 110.8(4)   | P3-C41-H41A   | 109.5      |
| P3-C41-H41B  | 109.5      | C40-C41-H41A  | 109.5      |

|              |           |               |           |
|--------------|-----------|---------------|-----------|
| C40–C41–H41B | 109.5     | H41A–C41–H41B | 108.1     |
| P3–C42–C43   | 120.7(4)  | P3–C42–C47    | 120.5(4)  |
| C43–C42–C47  | 118.7(5)  | C42–C43–H43   | 119.9     |
| C42–C43–C44  | 120.2(6)  | H43–C43–C44   | 119.9     |
| C43–C44–H44  | 119.6     | C43–C44–C45   | 120.7(6)  |
| H44–C44–C45  | 119.6     | C44–C45–H45   | 120.1     |
| C44–C45–C46  | 119.8(6)  | H45–C45–C46   | 120.1     |
| C45–C46–H46  | 120.2     | C45–C46–C47   | 119.7(6)  |
| H46–C46–C47  | 120.2     | C42–C47–C46   | 121.0(6)  |
| C42–C47–H47  | 119.5     | C46–C47–H47   | 119.5     |
| P3–C48–C49   | 121.8(4)  | P3–C48–C53    | 119.0(4)  |
| C49–C48–C53  | 119.1(5)  | C48–C49–H49   | 120.1     |
| C48–C49–C50  | 119.9(5)  | H49–C49–C50   | 120.1     |
| C49–C50–H50  | 119.7     | C49–C50–C51   | 120.5(6)  |
| H50–C50–C51  | 119.7     | C50–C51–H51   | 120.2     |
| C50–C51–C52  | 119.7(5)  | H51–C51–C52   | 120.2     |
| C51–C52–H52  | 119.7     | C51–C52–C53   | 120.6(5)  |
| H52–C52–C53  | 119.7     | C48–C53–C52   | 120.3(5)  |
| C48–C53–H53  | 119.9     | C52–C53–H53   | 119.9     |
| Re–C54–O1    | 175.9(5)  | Re–C55–O2     | 179.0(6)  |
| Re–C56–O3    | 173.5(5)  | F1–C57–F2     | 104.1(10) |
| F1–C57–F3    | 108.6(10) | F1–C57–S      | 109.6(10) |
| F2–C57–F3    | 106.8(13) | F2–C57–S      | 113.7(8)  |
| F3–C57–S     | 113.4(8)  | C57–S–O4      | 103.0(4)  |
| C57–S–O5     | 102.2(5)  | C57–S–O6      | 106.5(7)  |
| O4–S–O5      | 116.5(5)  | O4–S–O6       | 111.9(5)  |
| O5–S–O6      | 114.8(6)  | C59–C58–O7    | 117.9(7)  |
| C59–C58–O8   | 120.4(8)  | O7–C58–O8     | 121.7(7)  |
| C58–C59–C60  | 121.8(8)  | C58–C59–C64   | 119.7(7)  |
| C60–C59–C64  | 118.2(7)  | C59–C60–H60   | 118.5     |
| C59–C60–C61  | 122.9(8)  | H60–C60–C61   | 118.5     |
| C60–C61–C62  | 118.4(7)  | C60–C61–N3    | 123.6(8)  |
| C62–C61–N3   | 117.6(7)  | C61–C62–C63   | 119.0(7)  |
| C61–C62–N4   | 120.7(8)  | C63–C62–N4    | 120.3(8)  |

|                |       |                |          |
|----------------|-------|----------------|----------|
| C62-C63-H63    | 119.8 | C62-C63-C64    | 120.3(8) |
| H63-C63-C64    | 119.9 | C59-C64-C63    | 121.1(8) |
| C59-C64-H64    | 119.5 | C63-C64-H64    | 119.5    |
| C58-O8-H8      | 109.5 | C61-N3-H3A     | 120.0    |
| C61-N3-H3B     | 120.0 | H3A-N3-H3B     | 120.0    |
| C62-N4-H4A     | 120.0 | C62-N4-H4B     | 120.0    |
| H4A-N4-H4B     | 120.0 | H65A-C65-H65B  | 109.5    |
| H65A-C65-H65C  | 109.5 | H65A-C65-C66   | 109.5    |
| H65B-C65-H65C  | 109.5 | H65B-C65-C66   | 109.5    |
| H65C-C65-C66   | 109.5 | H65D-C65-H65E  | 109.5    |
| H65D-C65-H65F  | 109.5 | H65D-C65-C66'  | 109.5    |
| H65E-C65-H65F  | 109.5 | H65E-C65-C66'  | 109.5    |
| H65F-C65-C66'  | 109.5 | C65-C66-H66A   | 111.3    |
| C65-C66-H66B   | 111.3 | C65-C66-C67    | 102(2)   |
| H66A-C66-H66B  | 109.2 | H66A-C66-C67   | 111.3    |
| H66B-C66-C67   | 111.3 | C66-C67-H67A   | 106.2    |
| C66-C67-H67B   | 106.2 | C66-C67-C68    | 125(3)   |
| H67A-C67-H67B  | 106.4 | H67A-C67-C68   | 106.2    |
| H67B-C67-C68   | 106.2 | C67-C68-H68A   | 110.5    |
| C67-C68-H68B   | 110.5 | C67-C68-C69    | 106(2)   |
| H68A-C68-H68B  | 108.7 | H68A-C68-C69   | 110.5    |
| H68B-C68-C69   | 110.5 | C68-C69-H69A   | 109.5    |
| C68-C69-H69B   | 109.5 | C68-C69-H69C   | 109.5    |
| H69A-C69-H69B  | 109.5 | H69A-C69-H69C  | 109.5    |
| H69B-C69-H69C  | 109.5 | H69D-C69-H69E  | 109.5    |
| H69D-C69-H69F  | 109.5 | H69D-C69-C68'  | 109.5    |
| H69E-C69-H69F  | 109.5 | H69E-C69-C68'  | 109.5    |
| H69F-C69-C68'  | 109.5 | C65-C66'-H66C  | 110.6    |
| C65-C66'-H66D  | 110.6 | C65-C66'-C67'  | 106(2)   |
| H66C-C66'-H66D | 108.7 | H66C-C66'-C67' | 110.6    |
| H66D-C66'-C67' | 110.6 | C66'-C67'-H67C | 106.0    |
| C66'-C67'-H67D | 106.0 | C66'-C67'-C68' | 125(3)   |
| H67C-C67'-H67D | 106.3 | H67C-C67'-C68' | 106.0    |
| H67D-C67'-C68' | 106.0 | C69-C68'-C67'  | 102(2)   |



|                |       |                |       |
|----------------|-------|----------------|-------|
| C69-C68'-H68C  | 111.4 | C69-C68'-H68D  | 111.4 |
| C67'-C68'-H68C | 111.4 | C67'-C68'-H68D | 111.4 |
| H68C-C68'-H68D | 109.3 |                |       |

**Table 5:4.** Torsion angles [°] for ljh120041 (5).

|              |           |               |           |
|--------------|-----------|---------------|-----------|
| N2–B–N1–C1   | –179.7(5) | N2–B–N1–C4    | 5.4(8)    |
| C18–B–N1–C1  | –61.9(8)  | C18–B–N1–C4   | 123.1(6)  |
| C19–B–N1–C1  | 65.4(8)   | C19–B–N1–C4   | –109.5(6) |
| N1–B–N2–C6   | –7.1(7)   | N1–B–N2–C9    | 179.6(5)  |
| C18–B–N2–C6  | –125.1(6) | C18–B–N2–C9   | 61.5(8)   |
| C19–B–N2–C6  | 108.3(6)  | C19–B–N2–C9   | –65.1(7)  |
| B–N1–C1–C2   | –176.5(6) | B–N1–C1–C10   | 1.3(10)   |
| C4–N1–C1–C2  | –0.8(7)   | C4–N1–C1–C10  | 177.0(6)  |
| N1–C1–C2–C3  | 0.7(8)    | N1–C1–C2–C11  | –179.1(6) |
| C10–C1–C2–C3 | –177.1(6) | C10–C1–C2–C11 | 3.1(11)   |
| C1–C2–C3–C4  | –0.3(7)   | C1–C2–C3–C13  | –178.9(7) |
| C11–C2–C3–C4 | 179.5(6)  | C11–C2–C3–C13 | 0.9(11)   |
| B–N1–C4–C3   | 176.3(5)  | B–N1–C4–C5    | –1.5(9)   |
| C1–N1–C4–C3  | 0.6(7)    | C1–N1–C4–C5   | –177.2(5) |
| C2–C3–C4–N1  | –0.2(7)   | C2–C3–C4–C5   | 177.3(6)  |
| C13–C3–C4–N1 | 178.4(7)  | C13–C3–C4–C5  | –4.2(12)  |
| N1–C4–C5–C6  | –2.1(9)   | N1–C4–C5–C20  | 179.8(5)  |
| C3–C4–C5–C6  | –179.3(6) | C3–C4–C5–C20  | 2.5(10)   |
| C4–C5–C6–N2  | 0.5(9)    | C4–C5–C6–C7   | –180.0(6) |
| C20–C5–C6–N2 | 178.6(5)  | C20–C5–C6–C7  | –1.8(10)  |
| B–N2–C6–C5   | 4.8(8)    | B–N2–C6–C7    | –174.8(5) |
| C9–N2–C6–C5  | 179.3(5)  | C9–N2–C6–C7   | –0.3(6)   |
| N2–C6–C7–C8  | 0.2(7)    | N2–C6–C7–C14  | 178.0(6)  |
| C5–C6–C7–C8  | –179.4(6) | C5–C6–C7–C14  | –1.6(11)  |
| C6–C7–C8–C9  | 0.0(7)    | C6–C7–C8–C15  | –179.2(6) |
| C14–C7–C8–C9 | –177.9(6) | C14–C7–C8–C15 | 2.8(11)   |
| B–N2–C9–C8   | 174.7(5)  | B–N2–C9–C17   | –4.7(10)  |
| C6–N2–C9–C8  | 0.3(7)    | C6–N2–C9–C17  | –179.1(6) |
| C7–C8–C9–N2  | –0.2(7)   | C7–C8–C9–C17  | 179.2(6)  |
| C15–C8–C9–N2 | 179.0(6)  | C15–C8–C9–C17 | –1.6(11)  |

|                 |           |                 |           |
|-----------------|-----------|-----------------|-----------|
| C1-C2-C11-C12   | 94.4(8)   | C3-C2-C11-C12   | -85.4(9)  |
| C7-C8-C15-C16   | 77.8(9)   | C9-C8-C15-C16   | -101.3(8) |
| C4-C5-C20-C21   | 90.4(7)   | C4-C5-C20-C25   | -88.4(7)  |
| C6-C5-C20-C21   | -87.8(7)  | C6-C5-C20-C25   | 93.4(7)   |
| C5-C20-C21-C22  | -178.0(5) | C25-C20-C21-C22 | 0.7(9)    |
| C20-C21-C22-C23 | 1.0(9)    | C21-C22-C23-C24 | -1.2(9)   |
| C21-C22-C23-P2  | 179.3(4)  | C22-C23-C24-C25 | -0.2(9)   |
| P2-C23-C24-C25  | 179.3(5)  | C23-C24-C25-C20 | 1.8(10)   |
| C5-C20-C25-C24  | 176.6(6)  | C21-C20-C25-C24 | -2.1(10)  |
| C22-C23-P2-Re   | 4.1(6)    | C22-C23-P2-C39  | -122.6(5) |
| C22-C23-P2-C40  | 125.6(5)  | C24-C23-P2-Re   | -175.4(4) |
| C24-C23-P2-C39  | 57.9(5)   | C24-C23-P2-C40  | -53.9(5)  |
| Re-P1-C26-C27   | -58.0(5)  | Re-P1-C26-C31   | 124.2(5)  |
| C32-P1-C26-C27  | 71.2(5)   | C32-P1-C26-C31  | -106.6(5) |
| C38-P1-C26-C27  | -179.1(5) | C38-P1-C26-C31  | 3.1(6)    |
| P1-C26-C27-C28  | -177.8(5) | C31-C26-C27-C28 | 0.0(9)    |
| C26-C27-C28-C29 | 0.3(10)   | C27-C28-C29-C30 | -0.5(11)  |
| C28-C29-C30-C31 | 0.5(11)   | P1-C26-C31-C30  | 177.8(5)  |
| C27-C26-C31-C30 | 0.0(9)    | C29-C30-C31-C26 | -0.3(11)  |
| Re-P1-C32-C33   | 50.0(5)   | Re-P1-C32-C37   | -135.6(4) |
| C26-P1-C32-C33  | -81.6(5)  | C26-P1-C32-C37  | 92.8(5)   |
| C38-P1-C32-C33  | 168.1(4)  | C38-P1-C32-C37  | -17.6(5)  |
| P1-C32-C33-C34  | 173.8(5)  | C37-C32-C33-C34 | -0.8(9)   |
| C32-C33-C34-C35 | 1.3(10)   | C33-C34-C35-C36 | -0.8(10)  |
| C34-C35-C36-C37 | -0.1(10)  | C35-C36-C37-C32 | 0.6(10)   |
| P1-C32-C37-C36  | -174.5(5) | C33-C32-C37-C36 | -0.1(9)   |
| Re-P1-C38-C39   | 43.5(4)   | C26-P1-C38-C39  | 172.4(4)  |
| C32-P1-C38-C39  | -80.5(4)  | P1-C38-C39-P2   | -48.2(5)  |
| Re-P2-C39-C38   | 30.5(5)   | C23-P2-C39-C38  | 165.4(4)  |
| C40-P2-C39-C38  | -86.5(5)  | Re-P2-C40-C41   | -46.2(4)  |
| C23-P2-C40-C41  | -178.3(4) | C39-P2-C40-C41  | 72.4(4)   |
| P2-C40-C41-P3   | 49.2(5)   | Re-P3-C41-C40   | -29.7(4)  |

|                   |            |                    |           |
|-------------------|------------|--------------------|-----------|
| C42-P3-C41-C40    | 94.2(4)    | C48-P3-C41-C40     | -160.4(4) |
| Re-P3-C42-C43     | 158.1(4)   | Re-P3-C42-C47      | -27.0(5)  |
| C41-P3-C42-C43    | 38.4(5)    | C41-P3-C42-C47     | -146.7(4) |
| C48-P3-C42-C43    | -70.0(5)   | C48-P3-C42-C47     | 105.0(5)  |
| P3-C42-C43-C44    | 175.8(4)   | C47-C42-C43-C44    | 0.7(8)    |
| C42-C43-C44-C45   | -0.2(9)    | C43-C44-C45-C46    | -0.4(9)   |
| C44-C45-C46-C47   | 0.3(10)    | C45-C46-C47-C42    | 0.2(9)    |
| P3-C42-C47-C46    | -175.8(5)  | C43-C42-C47-C46    | -0.8(8)   |
| Re-P3-C48-C49     | -133.0(4)  | Re-P3-C48-C53      | 52.1(5)   |
| C41-P3-C48-C49    | -9.9(5)    | C41-P3-C48-C53     | 175.2(4)  |
| C42-P3-C48-C49    | 98.8(5)    | C42-P3-C48-C53     | -76.1(5)  |
| P3-C48-C49-C50    | -174.6(5)  | C53-C48-C49-C50    | 0.3(9)    |
| C48-C49-C50-C51   | -0.4(9)    | C49-C50-C51-C52    | 0.6(10)   |
| C50-C51-C52-C53   | -0.7(9)    | P3-C48-C53-C52     | 174.7(4)  |
| C49-C48-C53-C52   | -0.4(8)    | C51-C52-C53-C48    | 0.6(9)    |
| F1-C57-S-O4       | 60.7(10)   | F1-C57-S-O5        | -178.1(9) |
| F1-C57-S-O6       | -57.2(10)  | F2-C57-S-O4        | -55.3(9)  |
| F2-C57-S-O5       | 65.9(9)    | F2-C57-S-O6        | -173.3(9) |
| F3-C57-S-O4       | -177.7(12) | F3-C57-S-O5        | -56.5(14) |
| F3-C57-S-O6       | 64.4(14)   | O7-C58-C59-C60     | 6.2(10)   |
| O7-C58-C59-C64    | 179.9(7)   | O8-C58-C59-C60     | -171.9(7) |
| O8-C58-C59-C64    | 1.9(10)    | C58-C59-C60-C61    | 171.0(7)  |
| C64-C59-C60-C61   | -2.8(11)   | C59-C60-C61-C62    | 0.9(11)   |
| C59-C60-C61-N3    | -171.9(7)  | C60-C61-C62-C63    | 1.7(10)   |
| C60-C61-C62-N4    | -179.1(6)  | N3-C61-C62-C63     | 175.1(7)  |
| N3-C61-C62-N4     | -5.8(10)   | C61-C62-C63-C64    | -2.5(10)  |
| N4-C62-C63-C64    | 178.3(6)   | C58-C59-C64-C63    | -171.9(7) |
| C60-C59-C64-C63   | 2.0(11)    | C62-C63-C64-C59    | 0.6(11)   |
| C66'-C65-C66-C67  | 60(4)      | C65-C66-C67-C68    | -147(5)   |
| C66-C67-C68-C69   | -157(5)    | C67-C68-C69-C68'   | 65(4)     |
| C66-C65-C66'-C67' | -75(4)     | C65-C66'-C67'-C68' | 145(5)    |
| C68-C69-C68'-C67' | -67(4)     | C66'-C67'-C68'-C69 | 133(6)    |

**Table 5:5.** Anisotropic displacement parameters ( $\text{\AA}^2$ ) for ljh120041 (5). The anisotropic displacement factor exponent takes the form:  $-2\pi^2[h^2a^{*2}U^{11} + \dots + 2hka^*b^*U^{12}]$

|     | U <sup>11</sup> | U <sup>22</sup> | U <sup>33</sup> | U <sup>23</sup> | U <sup>13</sup> | U <sup>12</sup> |
|-----|-----------------|-----------------|-----------------|-----------------|-----------------|-----------------|
| Re  | 0.02057(19)     | 0.01549(19)     | 0.01942(19)     | 0.00224(11)     | 0.00150(12)     | -0.00142(11)    |
| B   | 0.028(3)        | 0.028(3)        | 0.022(3)        | 0.006(2)        | -0.004(2)       | 0.004(2)        |
| N1  | 0.029(3)        | 0.033(3)        | 0.020(2)        | 0.0013(19)      | -0.0029(19)     | -0.0017(19)     |
| N2  | 0.029(3)        | 0.028(3)        | 0.020(2)        | 0.0080(18)      | -0.0014(18)     | 0.0018(19)      |
| C1  | 0.030(3)        | 0.036(3)        | 0.027(3)        | 0.000(2)        | -0.002(2)       | -0.002(2)       |
| C2  | 0.030(3)        | 0.036(3)        | 0.029(3)        | -0.001(2)       | 0.006(2)        | -0.007(2)       |
| C3  | 0.036(3)        | 0.036(3)        | 0.023(3)        | 0.005(2)        | 0.003(2)        | -0.008(2)       |
| C4  | 0.032(3)        | 0.028(3)        | 0.017(2)        | 0.003(2)        | 0.000(2)        | -0.002(2)       |
| C5  | 0.032(3)        | 0.021(3)        | 0.024(3)        | 0.003(2)        | 0.000(2)        | 0.002(2)        |
| C6  | 0.027(3)        | 0.026(3)        | 0.020(3)        | 0.002(2)        | 0.000(2)        | 0.000(2)        |
| C7  | 0.029(3)        | 0.032(3)        | 0.027(3)        | 0.004(2)        | 0.006(2)        | 0.005(2)        |
| C8  | 0.035(3)        | 0.033(3)        | 0.035(3)        | 0.005(3)        | 0.011(3)        | 0.001(2)        |
| C9  | 0.037(3)        | 0.033(3)        | 0.023(3)        | 0.007(2)        | 0.008(2)        | 0.005(2)        |
| C10 | 0.030(3)        | 0.054(5)        | 0.033(3)        | 0.000(3)        | -0.006(3)       | -0.002(3)       |
| C11 | 0.038(4)        | 0.046(4)        | 0.037(3)        | 0.005(3)        | 0.008(3)        | -0.006(3)       |
| C12 | 0.048(4)        | 0.066(5)        | 0.050(4)        | 0.009(4)        | 0.016(3)        | 0.002(4)        |
| C13 | 0.036(4)        | 0.067(5)        | 0.024(3)        | 0.013(3)        | 0.002(3)        | -0.009(3)       |
| C14 | 0.026(3)        | 0.055(4)        | 0.032(3)        | 0.006(3)        | 0.004(2)        | 0.007(3)        |
| C15 | 0.040(4)        | 0.050(4)        | 0.037(3)        | 0.008(3)        | 0.016(3)        | 0.004(3)        |
| C16 | 0.041(4)        | 0.055(5)        | 0.048(4)        | 0.006(3)        | 0.019(3)        | -0.002(3)       |
| C17 | 0.055(4)        | 0.052(4)        | 0.026(3)        | 0.012(3)        | 0.010(3)        | 0.005(3)        |
| C18 | 0.042(4)        | 0.031(3)        | 0.035(3)        | 0.011(3)        | 0.006(3)        | 0.008(3)        |
| C19 | 0.044(4)        | 0.032(3)        | 0.024(3)        | 0.000(2)        | -0.002(3)       | -0.002(3)       |
| C20 | 0.027(3)        | 0.029(3)        | 0.019(3)        | 0.004(2)        | -0.002(2)       | -0.001(2)       |
| C21 | 0.026(3)        | 0.021(3)        | 0.032(3)        | 0.007(2)        | -0.001(2)       | 0.002(2)        |
| C22 | 0.030(3)        | 0.024(3)        | 0.021(3)        | 0.001(2)        | 0.001(2)        | -0.001(2)       |
| C23 | 0.029(3)        | 0.026(3)        | 0.019(3)        | 0.008(2)        | 0.001(2)        | -0.003(2)       |

|     |           |           |           |           |           |            |
|-----|-----------|-----------|-----------|-----------|-----------|------------|
| C24 | 0.042(3)  | 0.022(3)  | 0.025(3)  | 0.007(2)  | -0.008(2) | -0.002(2)  |
| C25 | 0.043(4)  | 0.022(3)  | 0.026(3)  | 0.002(2)  | -0.008(2) | -0.009(2)  |
| P1  | 0.0239(7) | 0.0204(7) | 0.0206(7) | 0.0023(5) | 0.0038(5) | -0.0023(5) |
| P2  | 0.0236(7) | 0.0179(7) | 0.0181(6) | 0.0033(5) | 0.0002(5) | -0.0018(5) |
| P3  | 0.0202(7) | 0.0180(7) | 0.0182(6) | 0.0015(5) | 0.0018(5) | -0.0017(5) |
| C26 | 0.025(3)  | 0.037(3)  | 0.022(3)  | 0.001(2)  | 0.004(2)  | -0.003(2)  |
| C27 | 0.035(3)  | 0.041(4)  | 0.028(3)  | 0.000(3)  | 0.007(2)  | 0.003(3)   |
| C28 | 0.040(4)  | 0.055(4)  | 0.027(3)  | -0.009(3) | 0.005(3)  | -0.001(3)  |
| C29 | 0.046(4)  | 0.069(5)  | 0.022(3)  | 0.005(3)  | 0.001(3)  | 0.010(3)   |
| C30 | 0.055(5)  | 0.057(5)  | 0.030(3)  | 0.011(3)  | 0.007(3)  | 0.011(4)   |
| C31 | 0.038(3)  | 0.042(4)  | 0.023(3)  | 0.008(2)  | 0.004(2)  | 0.005(3)   |
| C32 | 0.026(3)  | 0.031(3)  | 0.019(3)  | 0.004(2)  | 0.002(2)  | -0.001(2)  |
| C33 | 0.025(3)  | 0.034(3)  | 0.035(3)  | -0.003(2) | 0.003(2)  | -0.006(2)  |
| C34 | 0.036(3)  | 0.038(4)  | 0.042(4)  | -0.010(3) | 0.008(3)  | 0.006(3)   |
| C35 | 0.034(3)  | 0.052(4)  | 0.040(4)  | 0.007(3)  | 0.016(3)  | 0.009(3)   |
| C36 | 0.027(3)  | 0.049(4)  | 0.036(3)  | 0.010(3)  | 0.005(3)  | -0.004(3)  |
| C37 | 0.028(3)  | 0.030(3)  | 0.031(3)  | 0.004(2)  | 0.005(2)  | -0.006(2)  |
| C38 | 0.035(3)  | 0.021(3)  | 0.020(3)  | 0.003(2)  | 0.003(2)  | -0.005(2)  |
| C39 | 0.032(3)  | 0.021(3)  | 0.023(3)  | 0.005(2)  | 0.000(2)  | -0.009(2)  |
| C40 | 0.026(3)  | 0.028(3)  | 0.024(3)  | 0.000(2)  | 0.001(2)  | -0.001(2)  |
| C41 | 0.026(3)  | 0.023(3)  | 0.026(3)  | -0.001(2) | 0.000(2)  | 0.003(2)   |
| C42 | 0.024(3)  | 0.026(3)  | 0.017(2)  | 0.005(2)  | 0.000(2)  | -0.002(2)  |
| C43 | 0.029(3)  | 0.032(3)  | 0.023(3)  | 0.005(2)  | 0.006(2)  | 0.004(2)   |
| C44 | 0.031(3)  | 0.043(4)  | 0.027(3)  | 0.005(2)  | 0.007(2)  | 0.006(3)   |
| C45 | 0.028(3)  | 0.051(4)  | 0.030(3)  | 0.010(3)  | 0.008(2)  | -0.004(3)  |
| C46 | 0.035(3)  | 0.031(3)  | 0.041(4)  | 0.008(3)  | 0.006(3)  | -0.008(3)  |
| C47 | 0.024(3)  | 0.029(3)  | 0.033(3)  | 0.004(2)  | 0.006(2)  | -0.001(2)  |
| C48 | 0.021(3)  | 0.023(3)  | 0.023(3)  | 0.010(2)  | 0.003(2)  | 0.003(2)   |
| C49 | 0.036(3)  | 0.023(3)  | 0.022(3)  | 0.002(2)  | -0.002(2) | 0.002(2)   |
| C50 | 0.040(3)  | 0.027(3)  | 0.029(3)  | 0.010(2)  | 0.001(2)  | 0.006(2)   |
| C51 | 0.038(3)  | 0.036(3)  | 0.025(3)  | 0.009(2)  | 0.000(2)  | 0.002(3)   |
| C52 | 0.031(3)  | 0.035(3)  | 0.024(3)  | 0.001(2)  | 0.000(2)  | 0.002(2)   |

|      |            |           |            |            |           |            |
|------|------------|-----------|------------|------------|-----------|------------|
| C53  | 0.031(3)   | 0.028(3)  | 0.024(3)   | 0.001(2)   | 0.003(2)  | 0.001(2)   |
| C54  | 0.031(3)   | 0.013(2)  | 0.027(3)   | 0.003(2)   | 0.001(2)  | 0.001(2)   |
| O1   | 0.043(3)   | 0.037(3)  | 0.053(3)   | 0.006(2)   | 0.003(2)  | 0.010(2)   |
| C55  | 0.034(3)   | 0.015(3)  | 0.035(3)   | 0.005(2)   | 0.008(3)  | -0.001(2)  |
| O2   | 0.046(3)   | 0.031(2)  | 0.037(2)   | -0.011(2)  | -0.003(2) | -0.002(2)  |
| C56  | 0.024(3)   | 0.022(3)  | 0.037(3)   | 0.003(2)   | -0.005(2) | 0.004(2)   |
| O3   | 0.039(3)   | 0.056(3)  | 0.040(3)   | 0.027(2)   | 0.009(2)  | -0.008(2)  |
| C57  | 0.047(5)   | 0.091(8)  | 0.112(9)   | -0.046(7)  | 0.046(6)  | -0.022(5)  |
| F1   | 0.036(3)   | 0.239(12) | 0.172(9)   | -0.065(8)  | 0.005(4)  | -0.005(5)  |
| F2   | 0.146(7)   | 0.095(5)  | 0.102(5)   | -0.012(4)  | 0.083(5)  | -0.056(5)  |
| F3   | 0.116(7)   | 0.164(9)  | 0.216(11)  | -0.104(8)  | 0.104(7)  | -0.007(6)  |
| S    | 0.0451(10) | 0.0257(8) | 0.0596(11) | -0.0036(7) | 0.0064(8) | -0.0004(7) |
| O4   | 0.071(4)   | 0.037(3)  | 0.065(4)   | 0.002(2)   | 0.032(3)  | -0.005(3)  |
| O5   | 0.066(4)   | 0.107(6)  | 0.072(4)   | -0.011(4)  | 0.004(3)  | -0.028(4)  |
| O6   | 0.188(11)  | 0.061(5)  | 0.138(8)   | 0.026(5)   | 0.013(7)  | 0.059(6)   |
| C58  | 0.064(5)   | 0.031(4)  | 0.047(4)   | 0.014(3)   | 0.007(4)  | -0.006(3)  |
| C59  | 0.071(5)   | 0.028(4)  | 0.046(4)   | 0.013(3)   | 0.003(4)  | -0.013(3)  |
| C60  | 0.050(4)   | 0.034(4)  | 0.049(4)   | 0.004(3)   | 0.001(3)  | -0.012(3)  |
| C61  | 0.062(5)   | 0.031(4)  | 0.043(4)   | 0.001(3)   | 0.008(3)  | -0.017(3)  |
| C62  | 0.057(4)   | 0.021(3)  | 0.052(4)   | 0.005(3)   | -0.006(3) | -0.015(3)  |
| C63  | 0.057(4)   | 0.031(4)  | 0.047(4)   | 0.009(3)   | 0.001(3)  | -0.007(3)  |
| C64  | 0.064(5)   | 0.036(4)  | 0.044(4)   | 0.011(3)   | 0.005(3)  | -0.006(3)  |
| O7   | 0.061(4)   | 0.065(4)  | 0.055(3)   | 0.023(3)   | 0.001(3)  | 0.001(3)   |
| O8   | 0.073(4)   | 0.058(4)  | 0.042(3)   | 0.016(3)   | -0.003(3) | 0.006(3)   |
| N3   | 0.073(5)   | 0.069(5)  | 0.064(5)   | 0.005(4)   | 0.007(4)  | -0.004(4)  |
| N4   | 0.069(4)   | 0.039(4)  | 0.042(3)   | 0.007(3)   | -0.003(3) | -0.013(3)  |
| C65  | 0.220(17)  | 0.150(17) | 0.28(2)    | 0.010(14)  | 0.127(16) | 0.090(14)  |
| C66  | 0.199(17)  | 0.16(2)   | 0.28(2)    | 0.010(16)  | 0.129(17) | 0.089(15)  |
| C67  | 0.192(16)  | 0.161(19) | 0.28(2)    | 0.014(15)  | 0.130(16) | 0.071(15)  |
| C68  | 0.194(17)  | 0.18(2)   | 0.28(2)    | 0.019(16)  | 0.127(17) | 0.034(17)  |
| C69  | 0.189(16)  | 0.20(2)   | 0.30(2)    | 0.012(16)  | 0.111(16) | 0.036(15)  |
| C66' | 0.211(19)  | 0.18(2)   | 0.28(2)    | 0.009(16)  | 0.125(17) | 0.051(17)  |

|      |           |         |         |           |           |           |
|------|-----------|---------|---------|-----------|-----------|-----------|
| C67' | 0.199(17) | 0.17(2) | 0.29(2) | 0.015(15) | 0.126(17) | 0.045(15) |
| C68' | 0.189(17) | 0.19(2) | 0.28(2) | 0.015(17) | 0.126(17) | 0.043(17) |



**Table 5:6.** Hydrogen coordinates and isotropic displacement parameters ( $\text{\AA}^2$ ) for ljh120041 (5).

|      | x      | y       | z      | U     |
|------|--------|---------|--------|-------|
| H10A | 1.0537 | 0.2125  | 0.8149 | 0.061 |
| H10B | 0.9864 | 0.2432  | 0.8790 | 0.061 |
| H10C | 0.9821 | 0.1455  | 0.8595 | 0.061 |
| H11A | 1.0534 | 0.2605  | 0.7111 | 0.049 |
| H11B | 0.9761 | 0.2795  | 0.6368 | 0.049 |
| H12A | 1.0881 | 0.1741  | 0.6108 | 0.081 |
| H12B | 1.0305 | 0.1168  | 0.6690 | 0.081 |
| H12C | 0.9531 | 0.1358  | 0.5947 | 0.081 |
| H13A | 0.6432 | 0.2250  | 0.5888 | 0.066 |
| H13B | 0.7622 | 0.2863  | 0.5872 | 0.066 |
| H13C | 0.7537 | 0.1886  | 0.5658 | 0.066 |
| H14A | 0.3245 | 0.1789  | 0.7045 | 0.056 |
| H14B | 0.2459 | 0.1134  | 0.7465 | 0.056 |
| H14C | 0.2630 | 0.2109  | 0.7710 | 0.056 |
| H15A | 0.2433 | 0.1606  | 0.9020 | 0.050 |
| H15B | 0.3193 | 0.1275  | 0.9703 | 0.050 |
| H16A | 0.1610 | 0.0234  | 0.9227 | 0.072 |
| H16B | 0.2037 | 0.0234  | 0.8434 | 0.072 |
| H16C | 0.2797 | -0.0097 | 0.9118 | 0.072 |
| H17A | 0.4883 | 0.1098  | 1.0158 | 0.066 |
| H17B | 0.5973 | 0.0725  | 0.9913 | 0.066 |
| H17C | 0.6084 | 0.1700  | 1.0145 | 0.066 |
| H18A | 0.8571 | 0.0898  | 0.9144 | 0.053 |
| H18B | 0.7413 | 0.0684  | 0.9513 | 0.053 |
| H18C | 0.7437 | 0.0357  | 0.8677 | 0.053 |
| H19A | 0.8565 | 0.2602  | 0.9412 | 0.052 |
| H19B | 0.7443 | 0.2987  | 0.9079 | 0.052 |
| H19C | 0.7397 | 0.2430  | 0.9776 | 0.052 |

|      |         |         |         |       |
|------|---------|---------|---------|-------|
| H21  | 0.4720  | 0.0758  | 0.6242  | 0.032 |
| H22  | 0.3597  | 0.0962  | 0.5128  | 0.031 |
| H24  | 0.4023  | 0.3444  | 0.5673  | 0.038 |
| H25  | 0.5084  | 0.3246  | 0.6812  | 0.039 |
| H27  | 0.1934  | 0.1053  | 0.1461  | 0.042 |
| H28  | 0.1099  | 0.1190  | 0.0252  | 0.050 |
| H29  | 0.0982  | 0.2538  | -0.0163 | 0.055 |
| H30  | 0.1670  | 0.3701  | 0.0641  | 0.056 |
| H31  | 0.2510  | 0.3570  | 0.1855  | 0.041 |
| H33  | 0.3656  | 0.0599  | 0.2284  | 0.040 |
| H34  | 0.5304  | 0.0158  | 0.1909  | 0.046 |
| H35  | 0.7009  | 0.1108  | 0.1948  | 0.049 |
| H36  | 0.7040  | 0.2503  | 0.2335  | 0.046 |
| H37  | 0.5384  | 0.2957  | 0.2680  | 0.037 |
| H38A | 0.4019  | 0.3516  | 0.2932  | 0.031 |
| H38B | 0.2723  | 0.3495  | 0.3120  | 0.031 |
| H39A | 0.3920  | 0.3699  | 0.4252  | 0.032 |
| H39B | 0.4626  | 0.2970  | 0.4043  | 0.032 |
| H40A | 0.1313  | 0.2609  | 0.5064  | 0.032 |
| H40B | 0.2119  | 0.3482  | 0.5006  | 0.032 |
| H41A | 0.1287  | 0.3582  | 0.3795  | 0.031 |
| H41B | 0.0227  | 0.3350  | 0.4251  | 0.031 |
| H43  | -0.1555 | 0.2834  | 0.3997  | 0.033 |
| H44  | -0.3343 | 0.2243  | 0.4298  | 0.040 |
| H45  | -0.3875 | 0.0801  | 0.4227  | 0.044 |
| H46  | -0.2614 | -0.0064 | 0.3839  | 0.044 |
| H47  | -0.0821 | 0.0522  | 0.3536  | 0.035 |
| H49  | -0.0043 | 0.3819  | 0.2927  | 0.033 |
| H50  | -0.0907 | 0.4259  | 0.1815  | 0.038 |
| H51  | -0.1532 | 0.3311  | 0.0795  | 0.040 |
| H52  | -0.1335 | 0.1913  | 0.0889  | 0.037 |
| H53  | -0.0472 | 0.1457  | 0.1994  | 0.033 |
| H60  | 0.0506  | 0.5572  | 0.2281  | 0.056 |

|      |        |        |         |       |
|------|--------|--------|---------|-------|
| H63  | 0.4382 | 0.5229 | 0.2386  | 0.056 |
| H64  | 0.3234 | 0.5275 | 0.1249  | 0.059 |
| H8   | 0.0898 | 0.5126 | -0.0019 | 0.071 |
| H3A  | 0.0714 | 0.5443 | 0.3627  | 0.085 |
| H3B  | 0.1908 | 0.5409 | 0.4057  | 0.085 |
| H4A  | 0.4512 | 0.5217 | 0.3710  | 0.063 |
| H4B  | 0.3474 | 0.5314 | 0.4106  | 0.063 |
| H65A | 0.5951 | 0.3473 | 1.1080  | 0.302 |
| H65B | 0.4684 | 0.3741 | 1.0992  | 0.302 |
| H65C | 0.4875 | 0.2873 | 1.0609  | 0.302 |
| H65D | 0.5867 | 0.3195 | 1.0980  | 0.302 |
| H65E | 0.5373 | 0.4057 | 1.0880  | 0.302 |
| H65F | 0.4499 | 0.3211 | 1.0913  | 0.302 |
| H66A | 0.5985 | 0.3583 | 0.9830  | 0.237 |
| H66B | 0.5793 | 0.4457 | 1.0216  | 0.237 |
| H67A | 0.3644 | 0.3282 | 0.9778  | 0.238 |
| H67B | 0.3778 | 0.4265 | 0.9748  | 0.238 |
| H68A | 0.4459 | 0.4002 | 0.8457  | 0.249 |
| H68B | 0.3805 | 0.3068 | 0.8500  | 0.249 |
| H69A | 0.2553 | 0.3879 | 0.7935  | 0.335 |
| H69B | 0.2152 | 0.3586 | 0.8695  | 0.335 |
| H69C | 0.2802 | 0.4516 | 0.8652  | 0.335 |
| H69D | 0.2589 | 0.4168 | 0.7996  | 0.335 |
| H69E | 0.2685 | 0.3323 | 0.8399  | 0.335 |
| H69F | 0.2194 | 0.4070 | 0.8794  | 0.335 |
| H66C | 0.4965 | 0.2711 | 0.9813  | 0.253 |
| H66D | 0.5843 | 0.3563 | 0.9780  | 0.253 |
| H67C | 0.3912 | 0.4205 | 1.0001  | 0.249 |
| H67D | 0.3302 | 0.3354 | 0.9567  | 0.249 |
| H68C | 0.3997 | 0.4882 | 0.8906  | 0.251 |
| H68D | 0.4493 | 0.4127 | 0.8508  | 0.251 |

## 6 Absorption and Emission Spectroscopy

### 6.1 General Considerations

Absorption spectra were recorded with a Hitachi Model U-3310 spectrophotometer while fluorescence studies were recorded with a Hitachi F-4500 fluorescence spectrophotometer. Solvents used for spectroscopy experiments were spectrophotometric grade. Absorption and emission spectra were recorded for all compounds in dry degassed tetrahydrofuran at room temperature. Fluorescence quantum yields were measured with respect to 4,4-difluoro-8-phenyl-1,3,5,7-tetramethyl-2,6-diethyl-4-bora-3a,4a-diaza-s-indacene ( $\Phi = 0.76$ ,  $\lambda_{\text{abs}} = 524$  nm,  $\lambda_{\text{em}} = 537$  nm,  $\epsilon = 86,000$  M<sup>-1</sup>cm<sup>-1</sup>, THF).<sup>1</sup> Dyes were excited at 485 nm and excitation and emission slits were both set to 5 nm.

### 6.2 Absorption and Emission Spectra

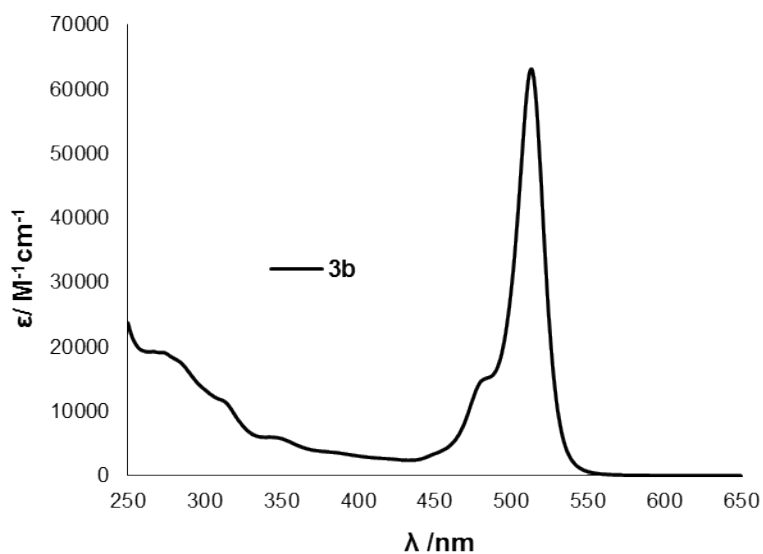

Fig. 6.1. Absorption spectrum of **3b** in THF at room temperature.

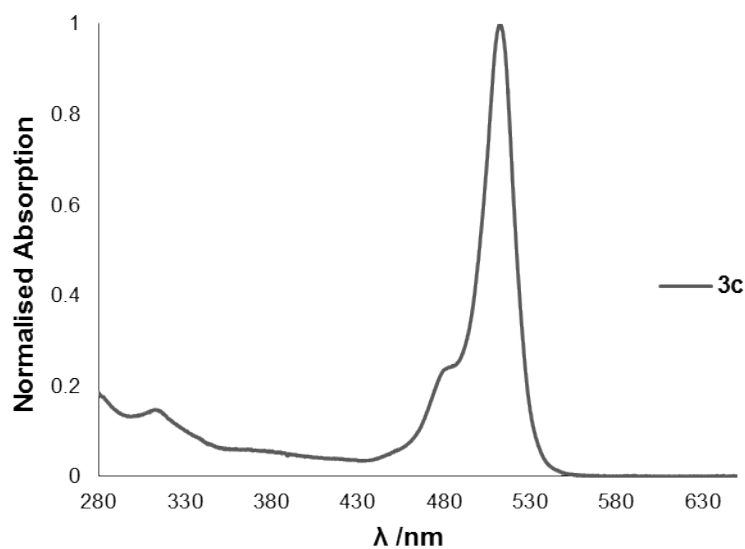

Fig. 6.2. Absorption spectrum of **3c** in THF at room temperature.

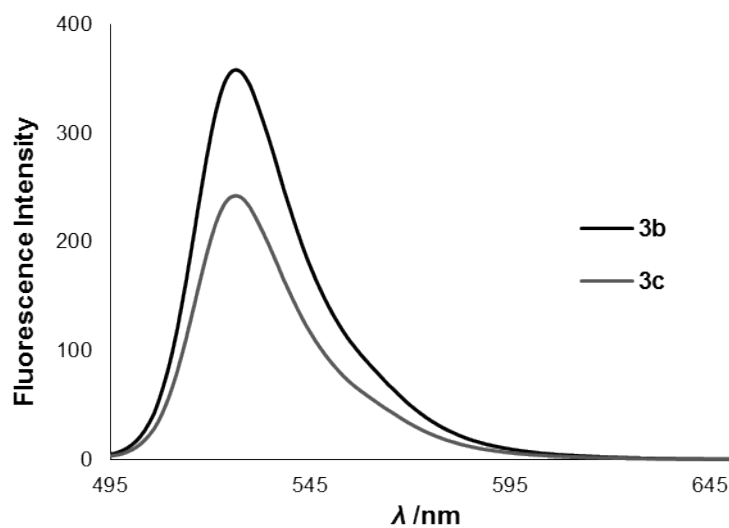

Fig. 6.3. Emission spectra of **3b** and **3c** in THF at room temperature (excitation  $\lambda = 485$  nm).

### 6.3 Quantum Yield Method<sup>11</sup>

The fluorescence quantum yield ( $\Phi_F$ ) can be defined as the ratio of emitted photons relative to the number of absorbed photons. All quantum yields were measured in solution at room temperature. In order to determine the fluorescence quantum yield an appropriate reference compound was selected (see General Considerations), which absorbs and emits over ranges comparable to those of the studied sample. The excitation wavelength, slit widths and the

emission range were kept constant for both the reference and the sample. Optically dilute solutions were prepared to possess exactly the same absorbance at the excitation wavelength ( $A < 0.09$  at the excitation wavelength, with an error limit of  $\pm 0.005$  between the reference and sample). The following formulae were used to correct the relative emission areas for minor differences in absorbance:

$$A = \log\left(\frac{I_0}{I_T}\right)$$

$$I_a + I_T = I_0 = 1$$

$$QY_{REL} = \frac{area}{I_a}$$

$A$  is the absorbance,  $I_0$  is the intensity of incident light,  $I_T$  is the intensity of the transmitted light,  $I_a$  is the intensity of absorbed light and  $QY_{REL}$  is the relative quantum yield.

Where necessary the quantum yields were corrected for the differences in the refractive index of the solvent:

$$QY_A = \frac{\eta_A^2}{\eta_B^2} QY_B$$

The subscripts A and B denote two different solvents and  $\eta$  is the refractive index.

The quantum yield of the sample can now be determined using the following equation:

$$QY^{Sl} = \frac{QY_{Ref}^{Sl}}{QY_{Ref}^{Ref}} QY^{Ref}$$

Superscript Sl and Ref denote sample and reference respectively.

## 7 References

---

1. (a) A. Coskun and E. U. Akkaya, *J. Am. Chem. Soc.*, 2005, **127**, 10464-10465; (b) Y. Gabe, Y. Urano, K. Kikuchi, H. Kojima and T. Nagano, *J. Am. Chem. Soc.*, 2004, **126**, 3357.
2. L. E. Crascall, J. L. Spencer, R. A. Doyle and R. J. Angelici, *Inorg. Synth.*, 1990, **28**, 346.
3. J. Chatt, J. R. Dilworth, H. P. Gunz and G. J. Leigh, *J. Organomet. Chem.*, 1974, **64**, 245.
4. L. H. Davies, R. W. Harrington, W. Clegg and L. J. Higham, manuscript in preparation.
5. S. P. Schmidt, J. Nitschke, W. C. Trogler, S. I. Hockett and R. J. Angelici, *Inorg. Synth.*, 1989, **26**, 113.
6. L. H. Davies, B. Stewart, R. W. Harrington, W. Clegg and L. J. Higham, *Angew. Chem. Int. Ed.*, 2012, **51**, 4921.
7. H. Jiang, B. B. Kasten, H. Liu, S. Qi, Y. Liu, M. Tian, C. L. Barnes, H. Zhang, Z. Cheng and P. D. Benny, *Bioconjugate Chem.*, 2012, **23**, 2300.
8. *CrysAlisPro*, Agilent Technologies Ltd., Oxford, 2008–2013.
9. *SHELXTL*, Bruker AXS Inc., Madison, Wisconsin, 2008–2013; *SHELXL-2013*, G. M. Sheldrick, University of Göttingen, Germany, 2013.
10. A. L. Spek, *Acta Crystallogr. Sect. D*, 2009, **65**, 148.
11. J. R. Lakowicz, *Principles of Fluorescence Spectroscopy*, 3rd ed., Springer, New York, **2006**.
